# Supplementary material for: Effectiveness and active ingredients of social prescribing interventions targeting mental health: a systematic review
Source: PubMed Central journal article supplement — BMJ Open. 2022 Jul 25;12(7):e060214. doi: 10.1136/bmjopen-2021-060214 (PMC9328101; doi:10.1136/bmjopen-2021-060214), 2022-07-25
Supplement: bmjopen-2021-060214.draft_revisions.pdf [file bmjopen-2021-060214.draft_revisions.pdf]

# BMJ Open

BMJ Open is committed to open peer review. As part of this commitment we make the peer review history of every article we publish publicly available.

When an article is published we post the peer reviewers' comments and the authors' responses online. We also post the versions of the paper that were used during peer review. These are the versions that the peer review comments apply to.

The versions of the paper that follow are the versions that were submitted during the peer review process. They are not the versions of record or the final published versions. They should not be cited or distributed as the published version of this manuscript.

BMJ Open is an open access journal and the full, final, typeset and author-corrected version of record of the manuscript is available on our site with no access controls, subscription charges or pay-per-view fees (<http://bmjopen.bmj.com>).

If you have any questions on BMJ Open's open peer review process please email [info.bmjopen@bmj.com](mailto:info.bmjopen@bmj.com)

# BMJ Open

## Identification of Active Ingredients of Social Prescribing Interventions Targeting Mental Health: A Systematic Review

|                               |                                                                                                                                                                                                                                                                                                                                                          |
|-------------------------------|----------------------------------------------------------------------------------------------------------------------------------------------------------------------------------------------------------------------------------------------------------------------------------------------------------------------------------------------------------|
| Journal:                      | <i>BMJ Open</i>                                                                                                                                                                                                                                                                                                                                          |
| Manuscript ID                 | bmjopen-2021-060214                                                                                                                                                                                                                                                                                                                                      |
| Article Type:                 | Original research                                                                                                                                                                                                                                                                                                                                        |
| Date Submitted by the Author: | 16-Dec-2021                                                                                                                                                                                                                                                                                                                                              |
| Complete List of Authors:     | Cooper, Matthew; Teesside University,<br>Avery, Leah; Teesside University, School of Health & Life Sciences<br>Scott, Jason; Northumbria University, Faculty of health and life sciences<br>Ashley, Kirsten; Teesside University<br>Jordan, Cara; Teesside University<br>Errington, Linda; Newcastle University<br>Flynn, Darren; Northumbria University |
| Keywords:                     | MENTAL HEALTH, PUBLIC HEALTH, PRIMARY CARE                                                                                                                                                                                                                                                                                                               |
|                               |                                                                                                                                                                                                                                                                                                                                                          |

SCHOLARONE™  
Manuscripts

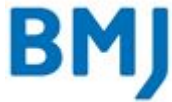

I, the Submitting Author has the right to grant and does grant on behalf of all authors of the Work (as defined in the below author licence), an exclusive licence and/or a non-exclusive licence for contributions from authors who are: i) UK Crown employees; ii) where BMJ has agreed a CC-BY licence shall apply, and/or iii) in accordance with the terms applicable for US Federal Government officers or employees acting as part of their official duties; on a worldwide, perpetual, irrevocable, royalty-free basis to BMJ Publishing Group Ltd ("BMJ") its licensees and where the relevant Journal is co-owned by BMJ to the co-owners of the Journal, to publish the Work in this journal and any other BMJ products and to exploit all rights, as set out in our [licence](#).

The Submitting Author accepts and understands that any supply made under these terms is made by BMJ to the Submitting Author unless you are acting as an employee on behalf of your employer or a postgraduate student of an affiliated institution which is paying any applicable article publishing charge ("APC") for Open Access articles. Where the Submitting Author wishes to make the Work available on an Open Access basis (and intends to pay the relevant APC), the terms of reuse of such Open Access shall be governed by a Creative Commons licence – details of these licences and which [Creative Commons](#) licence will apply to this Work are set out in our licence referred to above.

Other than as permitted in any relevant BMJ Author's Self Archiving Policies, I confirm this Work has not been accepted for publication elsewhere, is not being considered for publication elsewhere and does not duplicate material already published. I confirm all authors consent to publication of this Work and authorise the granting of this licence.

# Identification of Active Ingredients of Social Prescribing Interventions Targeting Mental Health: A Systematic Review.

Matthew Cooper<sup>1</sup>, Leah Avery<sup>1</sup>, Jason Scott<sup>2</sup>, Kirsten Ashley<sup>1</sup>, Cara Jordan<sup>1</sup>, Linda Errington<sup>3</sup>, Darren Flynn<sup>\*4</sup>

<sup>1</sup> School of Health and Life Sciences, Teesside University, Tees Valley, UK, <sup>2</sup> Department of Social Work, Education and Community Wellbeing, Northumbria University, Newcastle upon Tyne, UK, <sup>3</sup> School of Biomedical, Nutritional, and Sport Sciences, Newcastle University, Newcastle upon Tyne, UK, <sup>4</sup> Department of Nursing, Midwifery and Health, Faculty of Health and Life Sciences, Northumbria University, Newcastle upon Tyne, UK

\*Correspondence: [m.cooper@tees.ac.uk](mailto:m.cooper@tees.ac.uk)

School of Health and Life Sciences, Teesside University, Tees Valley, UK

Word Count: 4,275

(Excluding title page, abstract, strengths and limitations, references, endnotes, three figures, and two tables and supplementary material)

**KEYWORDS:** Mental Health, Public Health, Primary Care

## ABSTRACT

### Objectives

To establish the effectiveness, and active ingredients of UK-based social prescribing interventions targeting mental health and well-being outcomes.

### Study appraisal and synthesis methods

Nine databases were systematically searched and assessed independently for eligibility by two reviewers. Methodological quality was assessed using NIHR and CASP checklists. Data were extracted on study characteristics, study outcomes, referral pathways, treatment fidelity strategies, person-centredness (personal needs assessment, choice of social prescribing activity, eliciting their personal preferences; and receipt of social prescribing consistent with their preferences), intervention development processes, and theory-linked Behaviour Change Techniques (BCTs). Data were narratively synthesised.

### Results

Twelve studies were included in the review (N=5,479 participants). There were 10 uncontrolled before and after designs, one randomised controlled trial and one cohort study. The most reported referral pathways were initial referrals to link workers from primary care (n=4) or direct referral from primary care (n=4). Participants were working age adults (mean age range 42 to 56 years). Reasons for referral included anxiety, depression, social isolation, and loneliness. Eleven out of twelve studies reported statistically significant improvement in outcomes (mental wellbeing was the modal outcome measure). Two studies explicitly described all core components of person-centred care. Strategies to enhance treatment fidelity were sub-optimal across studies. None of the studies reported comprehensive intervention development processes. Two studies engaged service users in intervention design or conducted usability/feasibility testing. Nine different BCTs were identified across the 12 studies. The most frequently coded BCTs were credible source (n=6), social support-practical (n=3), social support-unspecified (n=2), and goal setting-outcome (n=2).

### Conclusions and implications

1  
2  
3 Robust conclusions on the effectiveness of social prescribing for mental health- related  
4 outcomes cannot be made. Future research would benefit from comprehensive developmental  
5 processes, with reference to appropriate theory, alongside utilisation of treatment fidelity  
6 strategies, and a focus on person-centred care.  
7  
8  
9  
10

11 **PROSPERO registration number**

12  
13 CRD42020167887  
14  
15  
16  
17  
18  
19  
20  
21  
22  
23  
24  
25  
26  
27  
28  
29  
30  
31  
32  
33  
34  
35  
36  
37  
38  
39  
40  
41  
42  
43  
44  
45  
46  
47  
48  
49  
50  
51  
52  
53  
54  
55  
56  
57  
58  
59  
60

For peer review only

### STRENGTHS AND LIMITATIONS OF THIS STUDY

- In addition to effectiveness, this review identified active ingredients of social prescribing interventions in the context of mental health.
- A novel approach to elucidating the theoretical basis of social prescribing interventions has been applied.
- Establishing the effectiveness of social prescribing interventions is hindered by lack of fidelity assessment.

For peer review only

## INTRODUCTION

Social prescribing is a complex intervention that aims to provide holistic support and care to people living with a range of long-term health problems.[1] It is defined by the Social Prescribing Network as ‘a means of enabling general practitioners and other frontline healthcare professionals to refer patients to a link worker’ from which a link worker will co-produce an action plan to address what matters to the individual.[2]

NHS England included social prescribing as one of the six pillars of a Universal Personalised Care Strategy,[3] and have a target to recruit an additional link workers to help reach 900,000 individuals by 2023.[3] This is despite several systematic reviews reporting that the evidence for the (cost-)effectiveness of social prescribing is mixed, with most studies having important methodological limitations, including absence of comparison groups,[4] disparity in follow-up periods,[4] absence of clear and focused objectives[5] and no statement of underpinning model or theory informing intervention content or components.[6]

To determine what works (or does not work) within social prescribing interventions, there is a pressing need to identify ‘active ingredients’ of social prescribing interventions such as mode of delivery, duration, intensity, underpinning theory/ model of behavioural change and theory-linked behaviour change techniques. Identification of these active ingredients will help to inform the design and evaluation of future social prescribing interventions, including optimisation of existing interventions. Kimberlee et al,[7] and Husk et al,[8] describe four models of social prescribing (referral pathways): signposting service users to appropriate services or groups; direct referral from primary care to an activity or service; a link worker (based within or externally to primary care) who receives referrals and in turn conducts a needs assessment and refers the service user onto an activity or service; and the latter model with the addition of feedback and a support loop between the link worker and the service user. This has been supported by purposive action, particularly influenced by the language of



1  
2  
3 prescribing in primary care, to enhance the implementation of social prescribing in primary  
4 care. [9]  
5  
6  
7  
8

9  
10 Approximately one in six adults in the UK are living with mental health conditions and social  
11 prescribing has the potential to improve outcomes for this population. Previous systematic  
12 reviews have evaluated the impact of social prescribing on people living with a range of health  
13 needs and long-term conditions, but without specific focus on elucidating the evidence of  
14 social prescribing interventions for people living with mental health conditions.[4,8,10] We  
15 conducted a systematic review to establish the effectiveness, and active ingredients of UK-  
16 based social prescribing interventions targeting mental health.  
17  
18  
19  
20  
21  
22  
23  
24  
25  
26  
27  
28  
29  
30  
31  
32  
33  
34  
35  
36  
37  
38  
39  
40  
41  
42  
43  
44  
45  
46  
47  
48  
49  
50  
51  
52  
53  
54  
55  
56  
57  
58  
59  
60

## **METHODS**

### **Study design**

This systematic review followed a published protocol (CRD42020167887)[11] and adhered to the Preferred Reporting Items for Systematic Review and Meta-Analysis (PRISMA) guidelines.[12] A PRISMA Checklist for this review is presented in supplementary materials 1.

### **Review Criteria**

Included studies were social prescribing interventions (any referral pathway, with or without a link worker based in any setting) involving adults aged >18 years that reported on mental health or well-being outcomes. Studies involving adults with physical health comorbidities were included if the study reported on mental health-related or wellbeing outcomes primarily. Only studies with a primary quantitative study design, published in English and conducted in the United Kingdom (UK) were eligible for inclusion in the review. The decision to restrict the review to UK-based studies was made to ensure relevance and transferability of the findings to the health and social care setting in the UK. Studies were excluded if there was no referral or signposting to either a link worker or group/service and/or did not report any empirical data.

### **Search Strategy**

The following nine databases were searched to February 2020: Cochrane Databases of Systematic Reviews (CDSR), The Cochrane Central Register of Controlled Trials (CENTRAL), CINAHL (Cumulative Index of Nursing and Allied Health Literature), Cochrane Protocols, Embase, Medline, PsycInfo, Scopus and Web of Science. Prior to searching, reviewers carried out an extensive exercise to identify and group together potentially relevant terms to cover the concepts of social prescribing and mental health. The search strategy was then developed by an expert information scientist (LE) and adapted as necessary to take into account differing indexing terms and other search functionality available in each of the additional databases.

1  
2  
3 The search strategy developed for Ovid Medline is provided in supplementary file 2. All  
4 modified searches can be supplied on request. Reference lists of included papers were  
5 searched to identify any further studies to be considered for eligibility of inclusion.  
6  
7  
8  
9

## 10 11 **Study Selection**

12 All results from electronic searches were uploaded to EndNote X9 and underwent a process  
13 of de-duplication. One reviewer (MC) screened all titles and abstracts and a second reviewer  
14 (CJ) independently screened 20% of the results generated by the search. Studies retained  
15 following screening of titles and abstracts were reassessed in full text by the same two  
16 reviewers (MC and CJ) working independently using a study selection form. At stage 1 and 2  
17 of study selection, any disagreements between the two reviewers that could not be resolved  
18 via discussion were referred to a third reviewer for adjudication (KA). Subsequently, hand  
19 searches of reference lists and citation searching (using Google Scholar) of included studies  
20 was conducted to identify any potentially relevant literature not captured by the electronic  
21 search.  
22  
23  
24  
25  
26  
27  
28  
29  
30  
31  
32  
33  
34  
35  
36

## 37 **Data Extraction**

38 A structured data extraction form was used to capture information on study characteristics  
39 (country of origin, aims, design, outcomes targeted, inclusion/exclusion criteria, sampling  
40 method, sample size, follow up period, loss to follow up), components of social prescribing  
41 interventions, methodological quality, extent that interventions were person-centred, treatment  
42 fidelity strategies, comprehensiveness of intervention development processes, and outcome  
43 measures. Data were extracted on three stages of social prescribing (where applicable): initial  
44 assessment, use of a facilitator or link worker, and delivery of socially prescribed activity at a  
45 specific service. Components of the Template for Intervention Description and Replication  
46 (TIDieR)[13] checklist was applied to describe key features of social prescribing interventions.  
47 One reviewer (MC) extracted data on all included studies and a second reviewer (KA) checked  
48  
49  
50  
51  
52  
53  
54  
55  
56  
57  
58  
59  
60

1  
2  
3 data extracted from 50% of included studies. Any discrepancies between the two reviewers  
4  
5 were resolved by discussion and checking the primary study data.  
6  
7

8  
9 Each included study was assessed for methodological quality by the same two reviewers (MC  
10 and KA), working independently using a checklist appropriate for the study design: The  
11 National Institute for Health Research Quality Assessment Tool for Before-After (Pre/Post)  
12 Studies[14], Critical Appraisal Skills Programme Cohort Study Design Checklist,[15] and  
13 Critical Appraisal Skills Programme Randomised Control Trial Checklist.[16]  
14  
15  
16  
17  
18  
19

20  
21  
22 Two reviewers (MC and KA) independently coded the presence of theory-linked BCTs within  
23 included studies using the BCT Taxonomy v1.[17]  
24  
25  
26  
27

28 Methodological strategies utilised by included studies to monitor and enhance the reliability  
29 and validity of behavioural interventions (i.e. treatment fidelity strategies) were assessed  
30 independently by MC and KA using a framework published by Bellg et al.[18] This framework  
31 describes treatment fidelity across five domains: design of the study; monitoring and improving  
32 provider training; monitoring and improving delivery of interventions; monitoring and improving  
33 receipt of interventions; and monitoring and improving enactment of intervention skills.  
34  
35  
36  
37  
38  
39  
40  
41  
42

43 The extent that included studies adhered to core principles of person-centred care was  
44 independently assessed by two reviewers (MC and KA). A 4-item checklist was designed  
45 specifically for this review, with reference to relevant literature[19-21] in order to record the  
46 explicit reference to; a needs assessment was conducted with the service user (i.e., a tailored  
47 conversation to discuss their needs and goals); offering a choice of social prescribing activity;  
48 actively involving the service user in discussion to elicit their preferences for type of social  
49 prescribing activity; and the service user received a social prescription consistent with their  
50 preferred choice of social prescribing activity.  
51  
52  
53  
54  
55  
56  
57  
58  
59  
60

1  
2  
3 The comprehensiveness of developmental processes for social prescribing interventions were  
4 assessed using a checklist developed in a previous systematic review[22] to record: use of a  
5 framework, theory or model to guide design and evaluation; use of best available evidence  
6 from research (e.g. systematic review); conducting a needs assessment with service users;  
7 evidence of co-production or design with service users; and evidence of piloting or feasibility  
8 testing in the target population.  
9  
10  
11  
12  
13  
14  
15  
16  
17

### 18 **Data Synthesis**

19  
20 Data were synthesised narratively due to the expected heterogeneity of study designs and  
21 outcome measures. The 'promise' of active ingredients and other intervention features for  
22 positively changing outcomes was assessed by calculating promise ratio.[23]  
23  
24  
25  
26  
27

### 28 **Patient and Public Involvement**

29  
30 There was no patient or public involvement in this research.  
31  
32  
33  
34  
35  
36  
37  
38  
39  
40  
41  
42  
43  
44  
45  
46  
47  
48  
49  
50  
51  
52  
53  
54  
55  
56  
57  
58  
59  
60

## RESULTS

In total 41,243 (database searching n=41,134, reference lists and citation searching n=109) potentially relevant studies were identified from the electronic search (Figure 1). A total of 256 full text articles were assessed for inclusion, with 12 papers fulfilling all the review criteria.[24-35]

**[Insert Figure 1 around here, Title: PRISMA Diagram]**

### Study Characteristics

A summary of included studies is presented in Table 1. The 12 included studies had a combined sample size of 5, 479 participants. Eleven studies were conducted in England[24-30,32-35] and one in Scotland.[31] Ten studies were uncontrolled before and after designs,[26-35] one a randomised controlled trial,[24] and one a cohort study.[25]

The referral pathways were mapped against those described by Husk et al[8]. The most common referral pathway was via link worker (n=4)[2,7,9,10] and a direct referral from primary care (n=4).[26,27,33,35] Two studies reported a direct referral from community care,[28,34] one study used a direct referral from multiple sectors (e.g. referrals from either General Practitioner (GP), Health Care Practitioner (HCP), community, self-referral, secondary care or social care).[24] One study used a community sector referral to a link work pathway.[30]

The initial assessment upon entry to a intervention was mainly reported to have been conducted by a General Practitioner[24-27,29,32,33,35] or other primary care professionals.[24,26,27,29,31,33,35] Initial assessments were also conducted by community-based professionals;[24,28-31,34] self-referral (where the individual contacts a social prescribing service directly);[24,31] secondary care based professionals[24] and social care based professionals.[24,34] Where a link worker model was utilised (n=6),[24,25,29-32] the

1  
2  
3 link worker was predominantly based within a primary care[25,31,32] or community-based  
4  
5 setting.[24,25,30]  
6  
7  
8

9 The mean age of participants ranged from 42 to 56 years across eight studies. Four studies  
10 did not report on the age of participants.[28,30,32,35] Eleven studies reported incomplete data  
11 about the sex of participants.[22,23,25-27,29,30-33] A higher proportion of female participants  
12 were reported in nine studies.[23-27,30-33]  
13  
14  
15  
16

17 Employment status was summarised into four categories: participants who were in work (either  
18 full time or part time), education (full time or part time education or described as a student), or  
19 position of responsibility (such as full time carers) (n=1, 806); those who were not unemployed  
20 or incapacitated from work (n=367); participants who were retired (n=792);[27,28,30] and  
21 participants described as 'other' (n=476).[24,25,27,28] The employment status for the  
22 remaining 2,115 participants was not reported.  
23  
24  
25  
26  
27  
28  
29  
30  
31  
32

33 The ethnicity of participants was reported in five of the twelve included  
34 studies,[25,28,30,34,35]. These studies reported between 55%[25] and 100%[30,34] of  
35 participants were from White of White British backgrounds, 45% as non-White,[25] between  
36 6%[28] and 21%[35] as Ethnic Minority Groups and 1%[28] as 'Other'. The current Consensus  
37 data reports the UK population to be 86% White, 8% Asian, 3% Black and 2% Mixed/Multiple  
38 Ethnic Groups.[36]  
39  
40  
41  
42  
43  
44  
45  
46  
47  
48

49 The most commonly reported reasons for referral to a social prescribing service were anxiety  
50 or depression, (or combined anxiety and depression) based on data from eight studies.[24-  
51 28,30,31,33] Social isolation and depression was the primary reason for referral in one  
52 study.[35] Loneliness was the primary reason for referral in one study[29] with social isolation  
53 and loneliness reported as the primary reasons for referral by two studies.[32,34] Six studies  
54 reported comorbid physical health conditions including: type 2 diabetes,[32,35] chronic  
55  
56  
57  
58  
59  
60

1  
2  
3 pain,[26,35] impaired mobility,[35] coronary obstructive pulmonary disease[32] and 'other'  
4 health or illness.[28,33]  
5  
6  
7  
8

9 The mean follow-up period based on data from 10 studies was 4.2 months (SD=2.4)[24-30,33-  
10 35], with a range of two months[27] to eight months.[29,35] One study did not report a follow-  
11 up period.[31] For one study the follow-up period was stated as dependant on individual  
12 need.[32] The mean loss to follow-up (attrition rate) was 51% (SD=22.7, range 11%[30] to  
13 85%[32]) based on data from 10 studies.[24-30,33-35] The attrition rate from referral to initial  
14 appointment with a link worker was reported in three studies,[24,25,32] with a mean of 40%  
15 (SD= 25), range of 14%[25] to 64%[32]. The attrition rate from initial appointment with a link  
16 worker or primary care professional to an organisation for a social prescription was reported  
17 in two studies,[26,32] with a range of 36%[26] to 58%[32].  
18  
19  
20  
21  
22  
23  
24  
25  
26  
27  
28  
29  
30  
31  
32  
33  
34  
35  
36  
37  
38  
39  
40  
41  
42  
43  
44  
45  
46  
47  
48  
49  
50  
51  
52  
53  
54  
55  
56  
57  
58  
59  
60



1  
2  
3  
4  
5  
6  
7  
8  
9  
10  
11  
12  
13  
14  
15  
16  
17  
18  
19  
20  
21  
22  
23  
24  
25  
26  
27  
28  
29  
30  
31  
32  
33  
34  
35  
36  
37  
38  
39  
40  
41  
42  
43  
44  
45  
46

**Table 1. Summary of study characteristics**

| Author(s)                                        | Study Design                    | Population (Mean Age, Sex%)                                                         | Reported Participant Ethnicity^               | Employment Status                                      | Reason for Referral             | Duration of Follow-up (Loss to Follow-up) | Referral Pathway (Husk et al, [8])      |
|--------------------------------------------------|---------------------------------|-------------------------------------------------------------------------------------|-----------------------------------------------|--------------------------------------------------------|---------------------------------|-------------------------------------------|-----------------------------------------|
| <b>Afuwape, et al. 2010</b> <sup>[24]</sup>      | Randomised Controlled Trial     | N=40 (Control Mean age=32.8, Intervention mean age= 42.73), 67% Female***, 33% Male | NR                                            | In+= 6<br>Out++= 31<br>Other =3                        | Anxiety and Depression          | 3 Months (20%)                            | Direct referral from multiple Sectors** |
| <b>Carnes, et al. 2017</b> <sup>[25]</sup>       | Cohort Study                    | N=486 (Control Mean age=58, Intervention mean age= 56), 55% Female, 43% Male        | White n= 258, Non-White n=213                 | In+ = 155<br>Other =315                                | Anxiety and Depression          | 8 Months (62%)                            | Link Model Worker                       |
| <b>van de Venter et al. 2014</b> <sup>[35]</sup> | Uncontrolled Before/After Study | N=44 (Mean age=NR), 82% Female, 16% Male                                            | White-British n= 29<br>BME n=9<br>Unknown n=6 | NR                                                     | Depression and Social Isolation | 5 Months (NR)                             | Direct Referral from Primary Care       |
| <b>Crone, et al. 2013</b> <sup>[26]</sup>        | Uncontrolled Before/After Study | N=255 (Mean age=NR), 76% Female, 22% Male                                           | NR                                            | NR                                                     | Anxiety and Depression          | 2.2 Months* (54%)                         | Direct Referral from Primary Care       |
| <b>Crone, et al. 2018</b> <sup>[27]</sup>        | Uncontrolled Before/After Study | N=1297 (Mean age=51.9), 76% Female, 24% Male***                                     | NR                                            | In+ = 218<br>Out++ = 507<br>Retired= 289<br>Other =137 | Anxiety and Depression          | 2 Months (52%)                            | Direct Referral from Primary Care       |
| <b>Jones, et al. 2013</b> <sup>[28]</sup>        | Uncontrolled Before/After Study | N=715 (Mean age=NR), 78% Female, 26% Male                                           | White n=623<br>BME n=38<br>Unknown n=8        | In+ =259<br>Out++ = 198<br>Retired= 209<br>Other=21    | Anxiety and Depression          | 3 Months (NR)                             | Direct Referral from Community Care     |
| <b>Kellezi, et al. 2019</b> <sup>[29]</sup>      | Uncontrolled Before/After Study | N=630 (Mean age=NR), 54%Female, 45% Male                                            | NR                                            | NR                                                     | Loneliness                      | 8 Months (71%)                            | Link Model Worker                       |

|                                                    |                                 |                                                             |                                     |                                                                 |                                       |                                     |                                           |
|----------------------------------------------------|---------------------------------|-------------------------------------------------------------|-------------------------------------|-----------------------------------------------------------------|---------------------------------------|-------------------------------------|-------------------------------------------|
| <b>Maund, et al. 2019</b> <sup>[30]</sup>          | Uncontrolled Before/After Study | N=16 (Mean age= NR), 50% Female, 50% Male                   | White-British n=13, White-Other n=3 | In <sup>+</sup> =1<br>Out <sup>++</sup> =10<br>Retired= 5       | Anxiety and Depression                | 6 months (11%)                      | Link worker model from community referral |
| <b>Morton, et al. 2015</b> <sup>[31]</sup>         | Uncontrolled Before/After Study | N=136 (Mean age=52), 73% Female <sup>***</sup> , 27% Male   | NR                                  | NR                                                              | Anxiety and Depression                | NR (48%)                            | Link Worker Model                         |
| <b>Peschery, et al. 2019</b> <sup>[32]</sup>       | Uncontrolled Before/After Study | N=448 (Mean age=50.3), 65% Female, 32% Male                 | NR                                  | In <sup>+</sup> =22<br>Out <sup>++</sup> =41                    | Mild to moderate mental health issues | Dependant on Needs Assessment (84%) | Link Worker Model                         |
| <b>Sumner, et al. 2019</b> <sup>[33]</sup>         | Uncontrolled Before/After Study | N=1297 (Mean age=51.1), 76% Female, 24% Male <sup>***</sup> | NR                                  | In <sup>+</sup> =218<br>Out <sup>++</sup> = 507<br>Retired =289 | Anxiety and Depression                | 2.1 Months* (48%)                   | Direct Referral from Primary Care         |
| <b>Thomson, L. J., et al. 2018</b> <sup>[34]</sup> | Uncontrolled Before/After Study | N=115 (Mean age=NR), 63% Female, 37% Male <sup>***</sup>    | White-British n=95                  | NR                                                              | Social Isolation                      | 2.5 Months* (NR)                    | Direct Referral from Community Care       |

<sup>^</sup>Terminology used by authors.

<sup>\*</sup>Mean calculated by authors based on reported data.

<sup>\*\*</sup> Multiple Sector – Referral from a combination of the following: General Practitioner, Health Care Professional, Community, Self-referral, Secondary Care or Social Care.

<sup>\*\*\*</sup> Not explicitly reported, calculated from subtracting percentage for the reported sex from 100.

<sup>+</sup> In = in work, education, or position of responsibility

<sup>++</sup> Out = out of work, education, or position of responsibility

NR- Not reported

## Study Outcomes

Outcomes are grouped into between-group and within-group differences (Table 2). Of the 12 included studies, 11 reported statistically significant improvements in mental health, mental well-being, general health or quality of life outcomes from baseline to follow-up[26-35] or between the intervention/ exposed and the comparator/ unexposed group[24,25].

The 7 or 14-item Warwick- Edinburgh Mental Wellbeing Scale (WEMWBS)[37] was the most frequently used outcome measure.[26-28,30-33,35] Six studies used the 14-item[24,25,28,29,31] and three used the 7-item short-form version.[24,26,30] All eight studies reported a statistically significant improvement in mental well-being assessed with the WEMWBS.

Two further studies[26,32] utilised measures of mental wellbeing: South West Wellbeing Questionnaire (SWWBQ)[26]; and Museum Wellbeing Measure for Older Adults (MWM-OA).[32] Both of these studies reported a statistically significant improvement in mental wellbeing.

One study assessed loneliness[27] using the University College London Loneliness Scale (ULS-8)[38] and reported a positive reduction in loneliness scores. Other outcomes assessed by studies were stress[27] using the Perceived Stress Scale (PSS)[39] and mood[28] using the Positive and Negative Affect Schedule (PANAS),[40] with both reporting an improvement from social prescribing.

Three studies [25,30,31] utilised symptom-based outcome measures such as: Hospital Anxiety and Depression Scale (HADS),[41] Generalised Anxiety Disorder Assessment (GAD-7).[42] Out of these three studies reported a statistically significant improvement in mental health symptoms.[28,29]

Other outcomes reported by two studies[22,23] were general health: General Health Questionnaire-28 (GHQ-28),[43] Global Assessment of Functioning (GAF),[44] and General Health Score (GHS).[43] One of the studies reported improved general health.[24] One study reported[24] improved health related quality of life assessed with the Short-Form-36 (SF-36).[45]

Two studies[23,24] reported on health service utilisation using patient reported data[26] and health records.[25] Both studies reported a statistically significant reductions in primary care usage when the number of group memberships increased.

**Table 2: Between and Within Group Changes in Outcomes**

| Paper                                             | Outcome Measure           | Statistically significant improvement (p-value) | Effect Size | 95% Confidence Intervals |
|---------------------------------------------------|---------------------------|-------------------------------------------------|-------------|--------------------------|
| <b>Between Group Changes</b>                      |                           |                                                 |             |                          |
| <b>Afuwape et al., 2010</b> <sup>[24]</sup>       | GHQ-28                    | Yes (p=0.03)                                    | 7.76*       | 0.86 to 14.65            |
|                                                   | GAF                       | No (p=0.87)                                     | -0.78*      | -10.40 to 8.84           |
|                                                   | SF-36 Mental Health Score | Yes (p=0.02)                                    | -11.93*     | -21.99 to -1.88          |
| <b>Carnes et al., 2017</b> <sup>[25]</sup>        | General Health Score      | No                                              | -0.03*      | -0.312 to 0.253          |
|                                                   | HADS Score                | No                                              | 0.23*       | -2.113 to 2.577          |
|                                                   | Wellbeing                 | No                                              | -0.09*      | -0.569 to 0.391          |
| <b>Within Group Changes</b>                       |                           |                                                 |             |                          |
| <b>van de Venter et al., 2014</b> <sup>[35]</sup> | WEMWBS-14                 | Yes (p<0.0001)                                  | 8.00        | 4.8 to 11.2              |
| <b>Crone et al., 2013</b> <sup>[26]</sup>         | WEMWBS-7                  | Yes (p<0.001)                                   | 3.00*       | Not Reported             |
|                                                   | WEMWBS -14                | Yes (p<0.001)                                   | 6.00*       | Not Reported             |
| <b>Crone et al., 2018</b> <sup>[27]</sup>         | WEMWBS-14                 | Yes (p<0.001)                                   | 6.50*       | Not Reported             |
| <b>Jones et al., 2013</b> <sup>**[28]</sup>       | General Health Scale      | Yes (p<0.001)                                   | 0.51        | Not Reported             |
|                                                   | Social Wellbeing: SWB-6   | Yes (p<0.001)                                   | 0.17        | Not Reported             |

|                                             |  |                    |                |              |                |
|---------------------------------------------|--|--------------------|----------------|--------------|----------------|
|                                             |  | WEMWBS-7           | Yes (p<0.001)  | 2.28         | Not Reported   |
|                                             |  | CES-D-7            | Yes (p<0.001)  | -1.99        | Not Reported   |
| <b>Kellezi et al., 2019<sup>[29]</sup></b>  |  | ULS-8              | Not Reported   | Not Reported | Not Reported   |
| <b>Maud et al., 2019<sup>[30]</sup></b>     |  | WEMWBS-14          | Yes (p=0.009)  | 4.00*        | Not Reported   |
|                                             |  | GAD-7              | Yes (p=0.002)  | -2.99*       | Not Reported   |
|                                             |  | PSS                | Yes (p=0.041)  | -1.96*       | Not Reported   |
|                                             |  | PANAS (Positive)   | Yes (p=0.012)  | 4.57*        | Not Reported   |
|                                             |  | PANAS (Negative)   | Yes (p=0.025)  | -0.92*       | Not Reported   |
| <b>Morton et al., 2015<sup>[31]</sup></b>   |  | HADS – Anxiety     | Yes (p<0.001)  | Not Reported | 2.2 to 3.3     |
|                                             |  | HADS - Depression  | Yes (p<0.001)  | Not Reported | 1.9 to 3.2     |
|                                             |  | WEMWBS-14          | Yes (p<0.001)  | Not Reported | -8.1 to -5.1   |
| <b>Peschery et al., 2019<sup>[32]</sup></b> |  | WEMWBS-7           | Yes (p<0.0001) | 2.78         | 1.68 to 3.88   |
| <b>Sumner et al., 2019<sup>[33]</sup></b>   |  | WEMWBS-14          | Yes (p<0.001)  | Not Reported | 0.925 to 0.984 |
| <b>Thomson et al., 2018<sup>[34]</sup></b>  |  | MWM-OA Main Effect | Yes (p<0.001)  | Not Reported | Not Reported   |

\*Calculated by author.

\*\*Components of the South West Well Being Questionnaire

Generalised Anxiety Disorder (GAD-7), Global Assessment of Functioning (GAF), General Health Questionnaire-28 (GHQ-28), General Health Score (GHS), Hospital Anxiety and Depression Scale (HADS), Museum Wellbeing Measure for Older Adults (MWM-OA), Perceived Stress Scale (PSS) Positive and Negative Affect Schedule (PANAS), University College London Loneliness Scale (ULS-8), Short Form-36 (SF-36), South West Well-being Questionnaire (SWWBQ), Warwick-Edinburgh Mental Wellbeing Scale (WEMWBS).

## Methodological Quality Assessment

The methodological quality assessment of each included study can be found in Supplementary material 3.

For the ten uncontrolled before and after studies, the scores (out of 24) ranged from 16,<sup>[33]</sup> to 10.<sup>[27,29]</sup> All before/after studies clearly stated the study question or objective and included participants that were representative of those who would be eligible in the clinical population of interest. Only six studies clearly described the eligibility criteria<sup>[26,28,31-33]</sup> or described the intervention in enough detail to ensure the consistent delivery across the included

1  
2  
3 population.[25-28,30,33] Only one study detailed sufficient information to conclude that all  
4 eligible participants were enrolled.[24] Only one study used a sample size sufficiently large  
5 enough to provide confidence in the findings (evidence that the sample size achieved was  
6 consistent with a statistical power analysis.[27] None of the before/after studies used blind  
7 outcome assessors. None of the studies measured outcomes at specified intervals across the  
8 study. However, eight studies used outcome measures that had been assessed for reliability  
9 and validity.[25,26,28-33] Eight studies utilised inferential statistical methods to examine  
10 changes in outcomes.[26-33] There were substantial losses to follow up across the 10 before  
11 and after studies ranging from 11% to 85% (mean=53%) based on data from eight studies.[24-  
12 31]

13  
14  
15  
16  
17  
18  
19  
20  
21  
22  
23  
24  
25  
26 The randomised controlled study[22] scored 20 out of a maximum of 22 points. A potential  
27 source for bias was performance and ascertainment as the allocation to groups was not  
28 concealed from the interventionists.

29  
30  
31  
32  
33  
34  
35 The cohort study[23] scored 23 out of a maximum of 24 points. A potential source of bias was  
36 a large loss to follow up (62%) suggesting a potential for attrition bias, however there was no  
37 evidence provided to attain if this was accounted for when designing the study to ensure  
38 sufficient power.

### 39 40 41 42 43 44 45 **Fidelity Assessment**

46  
47 A summary table presenting the treatment fidelity assessment can be found in supplementary  
48 material 4.

### 49 50 51 52 53 *Design of the study*

54  
55 Ten studies provided sufficient information to establish use of treatment fidelity strategies for  
56 study design to ensure the same dose of the intervention had been delivered within  
57 conditions.[24-28,30-33,35] None of the studies reported any explicit evidence they had  
58  
59  
60

1  
2  
3 planned for implementation setbacks (e.g. sufficient numbers of link workers being recruited  
4 to meet future demand).  
5  
6  
7  
8

9  
10 *Monitoring and improving provider training*

11 Five studies provided sufficient evidence that they provided standardised training for  
12 providers[24,25,28,30,31] (i.e. training was developed specifically for the purpose of  
13 intervention delivery); five studies accommodated and tailored training to address provider  
14 differences (i.e. rotations or specific role placement);[24-27,33] three studies targeted  
15 consolidation of skills of providers (e.g., follow up sessions with service/ research  
16 leads);[24,25,28] and one study minimised variation among providers by monitoring and  
17 reviewing delivery on a monthly basis.[28]  
18  
19  
20  
21  
22  
23  
24  
25  
26  
27

28  
29 *Monitoring and improving delivery of interventions*

30 Five studies[24,25,31,32,35] provided sufficient information to suggest they controlled for  
31 provider differences by using strategies including rotating sessions attended or offering a  
32 range of activities. Two studies[31,35] reduced differences within the intervention using  
33 strategies including standardised training or monitoring adherence to a protocol.  
34  
35  
36  
37  
38  
39  
40

41  
42 *Monitoring and improving receipt of interventions and enactment of intervention skills*

43 Three studies[24,25,31] reported information regarding service users comprehension of the  
44 intervention, and three studies[24,25,28] reported sufficient information to establish service  
45 users ability to receive the intervention using needs assessments prior to delivery of training.  
46  
47  
48  
49 None of the studies included in this review provide sufficient information to suggest the use of  
50 cognitive or behavioural skills in the enactment of the intervention in service users or staff.  
51  
52  
53  
54  
55  
56  
57  
58  
59  
60

### Person-Centredness

A summary table of the person-centredness of the study interventions is presented in supplementary material 5.

Five of the 12 included studies reported evidence that they had conducted a needs assessment with individual service users to discuss their needs and goals.[24,25,29,31,32]

Six studies explicitly stated that service users were offered a choice of social prescribing interventions.[25,27,29,31,32,35] Five studies provided sufficient evidence that service users were actively involved in discussions to elicit their preferences/values on the available social prescribing options.[24,25,29,31,32] Two studies provided explicit evidence that service users received a social prescription that was consistent with their preferences.[25,29] Overall, five studies did not report any explicit evidence that any core components of person-centred care were adopted.[26,28,30,33,34] Two of the twelve studies explicitly described all four components of person-centred care.[25,29]

### Intervention Development Processes

A summary table of the intervention development processes reported across studies is presented in supplementary material 6.

One study explicitly reported the application of the Medical Research Council Framework for the Development and Evaluation of Complex Interventions.[35] The remaining eleven studies made no explicit reference to the application of a framework, theory or model to underpin the development and evaluation of social prescribing interventions. Five studies reported using 'best available evidence'. [27-29,31,32] Two studies involved service users in co-design or co-production processes to design the intervention.[23,29] Two studies[29,30] conducted a needs assessment of the target population using qualitative research methods (e.g., consultations with service users). Evidence of usability testing and feasibility testing of the social prescribing intervention was reported by two studies.[29,30]



## Behaviour Change Techniques

A total of nine different BCTs (Figure 2) were reported across nine studies.[24-28,30-32,34]

The most frequently coded BCT was credible source (e.g. health care professional)(n=6), followed by social support-unspecified (e.g. social support from friends or relatives)(n=3), social support-practical (e.g. advise on, arrange, or provide practical help)(n=2) and goal setting-outcome (e.g. set a goal defined in terms of a positive outcome)(n=2). No BCTs were coded for three studies.[25,29,33]

**[Insert Figure 2 around here. Title: Frequency of Individual BCT's Across Included Studies]**

Individual BCTs were categorised into six groupings (Figure 3) in accordance to a publish taxonomy.[17] The most common groupings were comparison of outcomes (n=6), social support (n=5), and goals and planning (n=4).

**[Insert Figure 3 around here. Title: Frequency of BCT Groupings Across the Included Studies]**

A promise ratio analysis was planned for the coded BCTs and other intervention features; however, this was not feasible due to the preponderance of positive outcomes (i.e., different target behaviours and applications).

## DISCUSSION

### Summary of findings

This systematic review identified 12 UK-based studies of social prescribing interventions, which predominately utilised a link worker pathway or direct referral from a primary care model of social prescribing for working-age adults with common mental health conditions (anxiety and depression). All but one study reported a statistically significant improvement in mental wellbeing, mental health, loneliness, or general health/ quality of life outcomes. Consistent with previous research,[46-48] two studies[23,24] in the current review reported reductions in the number of primary care appointments. However, these findings should be interpreted with caution. Consistent with previous reviews of social prescribing interventions,[4,8,9,45] the majority (10 out of 12) of the included studies were uncontrolled before and after studies (with a range of methodological shortcomings). Attrition rates were high (mean of 51%) and there was substantial variability in outcome measures.

Person centredness is one of the key pillars of social prescribing for empowering the person to improve their own health.[49] However, only two studies included in this review reported evidence of adhering to the core principles of person-centred care.

Only one study[35] reported using a specific framework for the systematic development of the social prescribing intervention being evaluated; the Medical Research Council framework for developing and evaluating complex interventions.[50] No other study reported utilising a comprehensive systematic intervention development process, which limits the replicability of interventions identified in this review. There was a lack of service users' involvement across the studies and usability or feasibility testing of the social prescribing interventions. This lack of involvement could lead to issues with acceptability and appropriateness of the intervention, with regular involvement and testing ensuring that resources are not wasted.

1  
2  
3 Treatment fidelity strategies are critically important for external validity of interventions.  
4  
5 Evidence from this review indicated several shortcomings in this regard. For example, there  
6  
7 was a lack of reported training of staff who were responsible for the delivery of the  
8  
9 interventions, which would serve to promote consistent delivery  
10

11  
12  
13 This systematic review coded for the presence of theory linked BCTs to elucidate the  
14  
15 theoretical underpinning of social prescribing interventions. The most common BCT groupings  
16  
17 were comparisons of outcomes (BCT-credible source; e.g. information provided by a general  
18  
19 practitioner), social support (BCT-social support-practical; e.g. a friend providing transport to  
20  
21 the venue and BCT-social support -unspecified; e.g. a friend who they can call when they feel  
22  
23 anxious), and goals and planning (BCT-goal setting- behaviour; e.g. setting a goal defined in  
24  
25 terms of the behaviour such as attending a social event, BCT-goal setting-outcome e.g. setting  
26  
27 a goal defined in terms of the outcome of the target behaviour such as attending a regular  
28  
29 social group, and BCT-action planning; e.g. planning the performic of the behaviour such as  
30  
31 attending an art class at a particular time on a certain day of the week). Previous systematic  
32  
33 reviews of social prescribing literature and individual articles have not coded for BCT and  
34  
35 therefore no comparison can be made with other findings at this point. The importance of  
36  
37 referring to which BCTs have been used is important both from an understanding and  
38  
39 replicability point of view. [51-53]  
40  
41  
42  
43  
44

## 45 **Limitations**

46  
47 Active ingredients such as BCTs, person-centredness and other intervention features  
48  
49 identified in this review were limited by the available body of evidence consisting of 12 studies.  
50  
51 Whilst this is a limitation of the evidence base rather than this review specifically. Their  
52  
53 identification was reliant upon descriptions provided by study authors. Indeed, none of the  
54  
55 studies included provided an adequate description or a description of intervention content with  
56  
57 reference to the published BCT taxonomy.  
58  
59  
60

## Future Research

It is critical that complex interventions are underpinned by a structured development process involving service users and providers in a co-design activity with reference to appropriate evidence and theory. Future research should prioritise the application of theory and indeed more work is needed to identify which theory or combinations of theories is most appropriate to social prescribing interventions.

Future research on social prescribing interventions for mental health (and more broadly) would benefit from systematic evaluation of single and clustered BCTs. This would optimise the design and delivery of social prescribing interventions across the entire pathway (e.g., from initial contact with a primary care link worker to first appointment with the service providing socially prescribed activities). Interventions could then be tailored for individuals living with mental health conditions to improve person-centred outcomes. Cross-disciplinary reviews have identified the use of BCT clusters including goal planning,[51,52] feedback and monitoring,[51,52] social support,[51,52] and comparison of outcomes,[52] is associated with effectiveness for improving physical activity,[51] mental health seeking behaviour[52] and employee mental health.[53] In addition these reviews have highlighted interventions using clusters of BCTs focused on shaping knowledge and comparison of behaviour have also improved mental health seeking behaviour.[52]

Despite high rates of attrition across the studies included in this review, none of the included studies reported reasons for service users' disengaging from social prescribing. This warrants attention and further investigation in future research, as well as a more detailed understanding of why a high proportion of those referred to social prescribing interventions fail to engage. Both emphasise the need to engage service users in the design and evaluation of social prescribing interventions with a focus on principles of person-centred care.

1  
2  
3 The narrative synthesis presented in the review is based on data aggregated across the  
4 referral pathways adopted by studies. Therefore, future research should conceptualise social  
5 prescribing interventions as complex multi-faceted interventions. There are different referral  
6 pathways for social prescribing, including outside of primary care settings,[54] and the specific  
7 contact points (e.g., initial assessment, interaction with a facilitator or link worker and receipt/  
8 delivery or socially prescribing activity) need to be considered as separate, but linked facets of  
9 a complex multi-faceted intervention involving interactions between healthcare professionals  
10 and service users.  
11  
12  
13  
14  
15  
16  
17  
18  
19  
20  
21

## 22 **Conclusions**

23  
24 The predominance of before and after studies and associated methodological concerns, sub-  
25 optimal development processes, and limited utilisation of treatment fidelity strategies prevents  
26 any robust conclusions being made on the effectiveness of social prescribing for mental  
27 health-related outcomes. Future research would benefit from comprehensive development  
28 processes with reference to appropriate frameworks, theories or models, including adherence  
29 to principles of person-centred care, addressing treatment fidelity and exploring the impact of  
30 clusters of BCTs.  
31  
32  
33  
34  
35  
36  
37  
38  
39  
40  
41  
42  
43  
44  
45  
46  
47  
48  
49  
50  
51  
52  
53  
54  
55  
56  
57  
58  
59  
60

**Contributors**

MC and DF conceived the review. DF, LA, and JS supervised the review. KA and CJ assisted MC with study selection and data extraction. LE designed the search strategy and collated the search results. MC drafted the initial manuscript. All authors revised the manuscript for important intellectual content and approve the final manuscript.

**Funding**

This research received no specific grant from any funding agency in the public, commercial or not-for-profit sectors.

**Competing Interests**

None declared

**Patient Consent**

Not applicable

**Data Sharing Statement**

No original data were generated for this study.

**Ethics Statement**

Not applicable

## REFERENCES

1. Hassan SM, Giebel C, Morasae EK, et al. Social prescribing for people with mental health needs living in disadvantaged communities: the Life Rooms model. *BMC Health Services Research* 2020;20(1):1-9.
2. England N. Social Prescribing 2019 [Available from: [https:// www.england.nhs.uk/contact-us/privacy-notice/how-we-use-your-information/public-and-partners/social-prescribing/](https://www.england.nhs.uk/contact-us/privacy-notice/how-we-use-your-information/public-and-partners/social-prescribing/). accessed 01/03/2020.]
3. England N. NHS Long Term Plan 2019 [Available from: <https://www.longtermplan.nhs.uk/>. accessed 10/02/2021.]
4. Chatterjee HJ, Camic PM, Lockyer B, et al. Non-clinical community interventions: a systematised review of social prescribing schemes. *Arts & Health* 2018;10(2):97-123.
5. Moffatt S, Steer M, Lawson S, et al. Link Worker social prescribing to improve health and well-being for people with long-term conditions: qualitative study of service user perceptions. *BMJ Open* 2017;7(7):e015203.
6. White M, Salamon E. An interim evaluation of the 'Arts For Well-being'social prescribing scheme in County Durham. *Durham University: Centre for Medical Humanities* 2010
7. Kimberlee R. What is social prescribing? *Advances in Social Sciences Research Journal* 2015;2(1)
8. Husk K, Blockley K, Lovell R, et al. What approaches to social prescribing work, for whom, and in what circumstances? A realist review. *Health & Social Care in the Community* 2020;28(2):309-24.
9. Bradley G, Scott J. Social Prescribing Nomenclature, Occupational Therapy and the Theory of Institutional Work: Creating, Maintaining and Disrupting Medical Dominance. *Occupational Therapy In Health Care* 2021:1-14.
10. Bickerdike L, Booth A, Wilson PM, et al. Social prescribing: less rhetoric and more reality. A systematic review of the evidence. *BMJ Open* 2017;7(4)
11. Cooper M, Ashley K, Jordan C, et al. Active ingredients in social prescription interventions for adults with mental health issues: a systematic review. Protocol. *PROSPERO* 2020 CRD42020167887 2020

12. Moher D, Liberati A, Tetzlaff J, et al. Preferred reporting items for systematic reviews and meta-analyses: the PRISMA statement. *PLoS Medicine* 2009;6(7):e1000097.
13. Collaboration C, Training C. Template for Intervention Description and Replication (TIDieR).
14. Research NIfH. Quality Assessment Tool for Before-After (Pre-Post) Studies [Available from: <https://www.nhlbi.nih.gov/health-topics/study-quality-assessment-tools> accessed 05/01/2020.]
15. Programme CAS. CASP Cohort Checklist 2018 [Available from: <https://casp-uk.net/casp-tools-checklists/> accessed 05/01/2020.]
16. Checklist CAS. CASP RCT Checklist 2018 [Available from: <https://casp-uk.net/casp-tools-checklists/> accessed 05/01/2020.]
17. Michie S, Richardson M, Johnston M, et al. The behavior change technique taxonomy (v1) of 93 hierarchically clustered techniques: building an international consensus for the reporting of behavior change interventions. *Annals of Behavioral Medicine* 2013;46(1):81-95.
18. Bellg AJ, Borrelli B, Resnick B, et al. Enhancing treatment fidelity in health behavior change studies: best practices and recommendations from the NIH Behavior Change Consortium. *Health Psychology* 2004;23(5):443.
19. Santana MJ, Manalili K, Jolley RJ, et al. How to practice person-centred care: A conceptual framework. *Health Expectations* 2018;21(2):429-40.
20. McCormack B, Dewing J, Mccance T. Developing person-centred care: addressing contextual challenges through practice development. 2011
21. Moore L, Britten N, Lydahl D, et al. Barriers and facilitators to the implementation of person-centred care in different healthcare contexts. *Scandinavian Journal of Caring Sciences* 2017;31(4):662-73.
22. Flynn D, Knoedler MA, Hess EP, et al. Engaging patients in health care decisions in the emergency department through shared decision-making: a systematic review. *Academic Emergency Medicine* 2012;19(8):959-67.



- 1  
2  
3 23. Moore SA, Hrisos N, Flynn D, et al. How should long-term free-living physical activity be targeted  
4 after stroke? A systematic review and narrative synthesis. *International Journal of Behavioral*  
5 *Nutrition and Physical Activity* 2018;15(1):1-19.  
6  
7  
8  
9 24. Afuwape SA, Craig TKJ, Harris T, et al. The Cares of Life Project (CoLP): An exploratory  
10 randomised controlled trial of a community-based intervention for black people with common  
11 mental disorder. *Journal of Affective Disorders* 2010;127(1-3):370-74.  
12  
13  
14  
15 25. Carnes D, Sohanpal R, Frostick C, et al. The impact of a social prescribing service on patients in  
16 primary care: a mixed methods evaluation. *BMC Health Services Research* 2017;17:1-9.  
17  
18  
19 26. Crone DM, O'Connell EE, Tyson PJ, et al. 'Art Lift' intervention to improve mental well-being: An  
20 observational study from UK general practice. *International Journal of Mental Health Nursing*  
21 2013;22(3):279-86.  
22  
23  
24  
25 27. Crone DM, Sumner RC, Baker CM, et al. 'Artlift' arts-on-referral intervention in UK primary care:  
26 updated findings from an ongoing observational study. *European Journal of Public Health*  
27 2018;28(3):404-09.  
28  
29  
30  
31 28. Jones M, Kimberlee R, Deave T, et al. The Role of Community Centre-based Arts, Leisure and  
32 Social Activities in Promoting Adult Well-being and Healthy Lifestyles. *International Journal of*  
33 *Environmental Research and Public Health* 2013;10(5):1948-62.  
34  
35  
36  
37 29. Kellezi B, Wakefield JRH, Stevenson C, et al. The social cure of social prescribing: A mixed-  
38 methods study on the benefits of social connectedness on quality and effectiveness of care  
39 provision. *BMJ Open* 2019;9(11):e033137.  
40  
41  
42  
43 30. Maund PR, Irvine KN, Reeves J, et al. Wetlands for wellbeing: Piloting a nature-based health  
44 intervention for the management of anxiety and depression. *International Journal of*  
45 *Environmental Research and Public Health* 2019;16(22):4413.  
46  
47  
48  
49 31. Morton L, Ferguson M, Baty F. Improving wellbeing and self-efficacy by social prescription. *Public*  
50 *Health* 2015;129(3):286-9.  
51  
52  
53  
54 32. Pescheny JV, Gunn LH, Pappas Y, et al. The impact of the Luton social prescribing programme  
55 on mental well-being: a quantitative before-and-after study. *Journal of Public Health*  
56 2019;27:e69-e76.  
57  
58  
59  
60

- 1  
2  
3 33. Sumner RC, Crone DM, Baker C, et al. Factors associated with attendance, engagement and  
4 wellbeing change in an arts on prescription intervention. *Journal of Public Health* 2019;08:e88-  
5 e95.  
6  
7  
8  
9 34. Thomson LJ, Lockyer B, Camic PM, et al. Effects of a museum-based social prescription  
10 intervention on quantitative measures of psychological wellbeing in older adults. *Perspectives*  
11 *in Public Health* 2018;138(1):28-38.  
12  
13  
14  
15 35. van de Venter E BA. Arts on referral interventions: a mixed-methods study investigating factors  
16 associated with differential changes in mental well-being. *Journal of Public Health*  
17 2014;37(1):143-50.  
18  
19  
20  
21 36. Gov.UK. Population of England and Wales 01/08/2018; 2018 [Available from:  
22 [https://www.ethnicity-facts-figures.service.gov.uk/uk-population-by-ethnicity/national-and-](https://www.ethnicity-facts-figures.service.gov.uk/uk-population-by-ethnicity/national-and-regional-populations/population-of-england-and-wales/latest)  
23 [regional-populations/population-of-england-and-wales/latest](https://www.ethnicity-facts-figures.service.gov.uk/uk-population-by-ethnicity/national-and-regional-populations/population-of-england-and-wales/latest) accessed 14/09/2021.]  
24  
25  
26  
27  
28 37. Tennant R, Hiller L, Fishwick R, et al. The Warwick-Edinburgh mental well-being scale  
29 (WEMWBS): development and UK validation. *Health and Quality of life Outcomes*  
30 2007;5(1):1-13.  
31  
32  
33  
34 38. Russell DW. UCLA Loneliness Scale (Version 3): Reliability, validity, and factor structure. *Journal*  
35 *of Personality Assessment* 1996;66(1):20-40.  
36  
37  
38  
39 39. Cohen S, Kamarck T, Mermelstein R. Perceived stress scale. *Measuring stress: A guide for health*  
40 *and social scientists* 1994;10(2):1-2.  
41  
42  
43 40. Watson D, Clark LA. The PANAS-X: Manual for the positive and negative affect schedule-  
44 expanded form. 1999  
45  
46  
47 41. Zigmond AS, Snaith RP. The hospital anxiety and depression scale. *Acta psychiatrica*  
48 *scandinavica* 1983;67(6):361-70.  
49  
50  
51 42. Spitzer RL, Kroenke K, Williams JB, et al. A brief measure for assessing generalized anxiety  
52 disorder: the GAD-7. *Archives of Internal Medicine* 2006;166(10):1092-97.  
53  
54  
55 43. Goldberg DP, Hillier VF. A scaled version of the General Health Questionnaire. *Psychological*  
56 *Medicine* 1979;9(1):139-45.  
57  
58  
59 44. Hall RC. Global assessment of functioning: a modified scale. *Psychosomatics* 1995;36(3):267-75.  
60

- 1  
2  
3 45. Jenkinson C, Coulter A, Wright L. Short form 36 (SF36) health survey questionnaire: normative  
4 data for adults of working age. *British Medical Journal* 1993;306(6890):1437-40.  
5  
6  
7 46. Polley M, Pilkington K. A review of the evidence assessing impact of social prescribing on  
8 healthcare demand and cost implications 2017 [Available from:  
9 [https://westminsterresearch.westminster.ac.uk/item/q1455/a-review-of-the-evidence-](https://westminsterresearch.westminster.ac.uk/item/q1455/a-review-of-the-evidence-assessing-impact-of-social-prescribing-on-healthcare-demand-and-cost-implications)  
10 [assessing-impact-of-social-prescribing-on-healthcare-demand-and-cost-implications.](https://westminsterresearch.westminster.ac.uk/item/q1455/a-review-of-the-evidence-assessing-impact-of-social-prescribing-on-healthcare-demand-and-cost-implications)  
11  
12  
13  
14  
15 Accessed on 14/09/2021.]  
16  
17 47. Longwill A. Independent evaluation of Hackney WellFamily service. *Improving Health and*  
18 *Wellbeing UK* 2014  
19  
20  
21 48. Brandling J, House W. Social prescribing in general practice: adding meaning to medicine. *British*  
22 *Journal of General Practice* 2009;59(563):454-56.  
23  
24  
25 49. Polley M, Whiteside J, Elnaschie S, et al. What does successful social prescribing look like?  
26 Mapping meaningful outcomes: London University of Westminster, 2020.  
27  
28  
29 50. Council MR. Developing and evaluating complex interventions: new guidance. Medical Research  
30 Council 2008  
31  
32  
33 51. French DP, Olander EK, Chisholm A, et al. Which behaviour change techniques are most effective  
34 at increasing older adults' self-efficacy and physical activity behaviour? A systematic review.  
35 *Annals of Behavioral Medicine* 2014;48(2):225-34.  
36  
37  
38 52. Sagar-Ouriaghli I, Godfrey E, Bridge L, et al. Improving mental health service utilization among  
39 men: a systematic review and synthesis of behavior change techniques within interventions  
40 targeting help-seeking. *American Journal of Men's Health* 2019;13(3):1557988319857009.  
41  
42  
43 53. De Korte E, Wiezer N, Roozeboom MB, et al. Behavior change techniques in mhealth apps for  
44 the mental and physical health of employees: Systematic assessment. *Journal Medical*  
45 *Internet Research mHealth and uHealth* 2018;6(10):e167.  
46  
47  
48 54. Scott J, Fidler G, Monk D, et al. Exploring the potential for social prescribing in pre-hospital  
49 emergency and urgent care: A qualitative study. *Health & Social Care in the Community*  
50 2021;29(3):654-63.  
51  
52  
53  
54  
55  
56  
57  
58  
59  
60

1  
2  
3 **LEGEND**  
4

5 **Figure 1 – PRISMA Diagram**  
6

7 **Table 1- Summary of Characteristics**  
8

9 Footnotes:

10 ^Terminology used by authors.

11 \*Mean calculated by authors based on reported data.

12 \*\* Multiple Sector – Referral from a combination of the following: General Practitioner, Health Care  
13 Professional, Community, Self-referral, Secondary Care or Social Care.

14 \*\*\* Not explicitly reported, calculated from subtracting percentage for the reported sex from 100.

15 + In = in work, education, or position of responsibility

16 ++ Out = out of work, education, or position of responsibility

17 NR- Not reported

18 **Table 2- Between and Within Group Changes in Outcomes**  
19

20 Footnotes:

21 \*Calculated by author.

22 \*\*Components of the South West Well Being Questionnaire

23 Generalised Anxiety Disorder (GAD-7), Global Assessment of Functioning (GAF), General Health Questionnaire-28  
24 (GHQ-28), General Health Score (GHS), Hospital Anxiety and Depression Scale (HADS), Museum Wellbeing Measure  
25 for Older Adults (MWM-OA), Perceived Stress Scale (PSS) Positive and Negative Affect Schedule (PANAS), University  
26 College London Loneliness Scale (ULS-8), Short Form-36 (SF-36), South West Well-being Questionnaire (SWWBQ),  
27 Warwick- Edinburgh Mental Wellbeing Scale (WEMWBS).

28 **Figure 2 – Frequency of Individual Behaviour Change Techniques Across Individual  
29 Studies**  
30

31 **Figure 3 - Frequency of Behaviour Change Groupings Across the Included Studies**  
32  
33  
34  
35  
36  
37  
38  
39  
40  
41  
42  
43  
44  
45  
46  
47  
48  
49  
50  
51  
52  
53  
54  
55  
56  
57  
58  
59  
60

**Figure 1: PRISMA Diagram**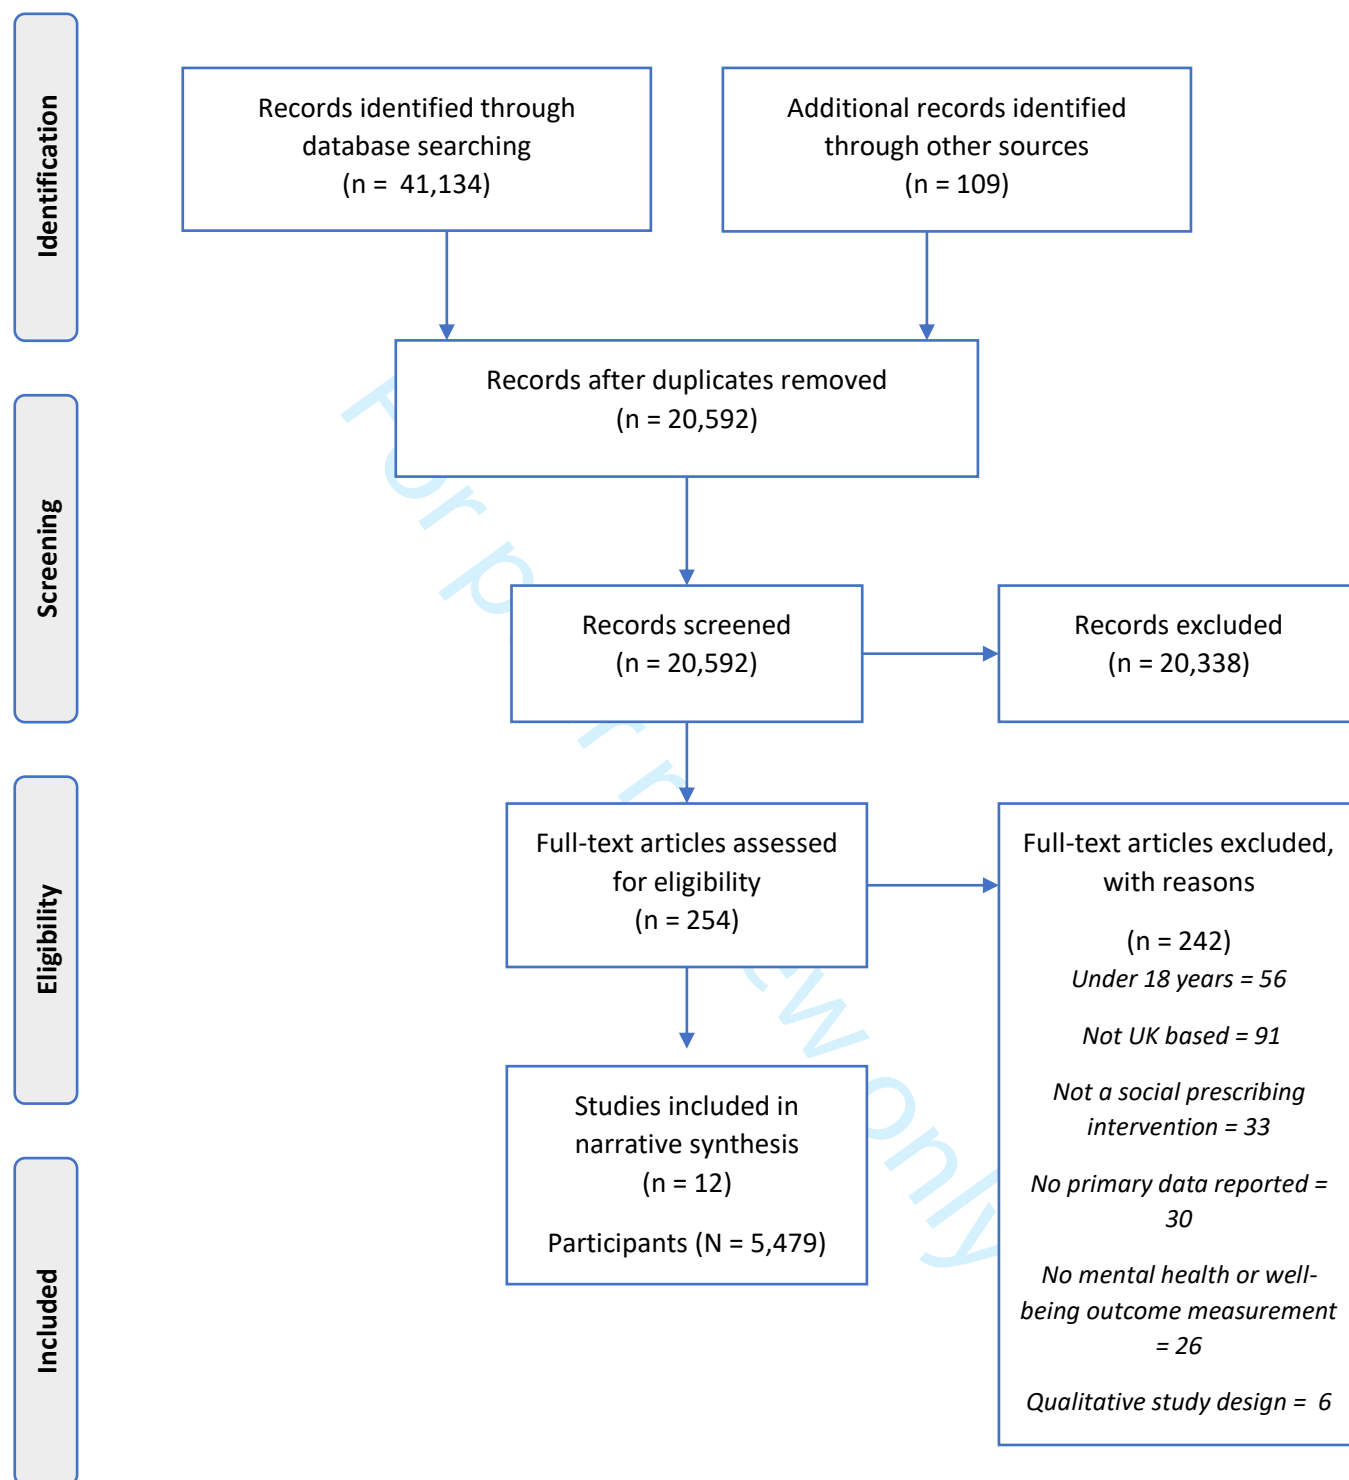

**Figure 2: Frequency of Individual BCT's Across Included Studies**

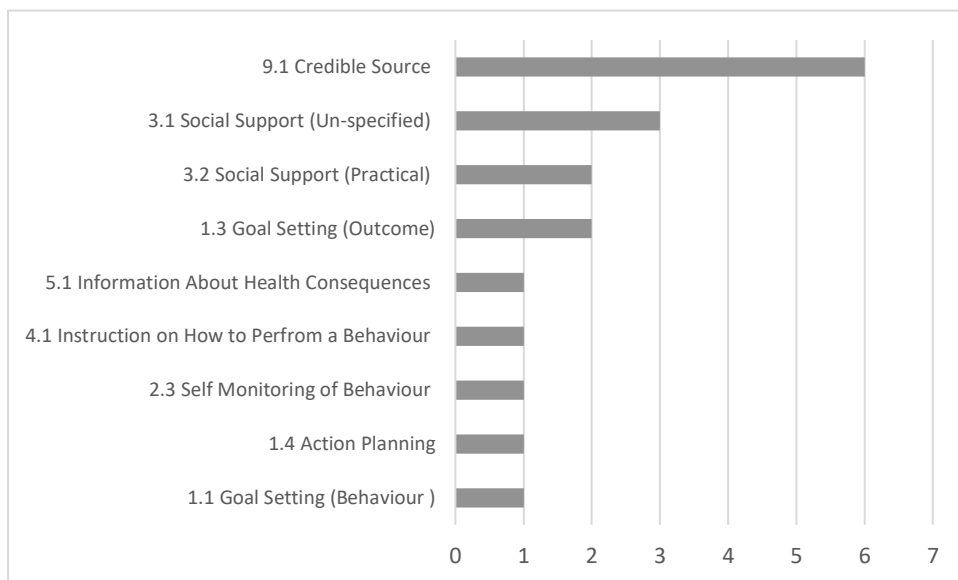

**Figure 3: Frequency of BCT Groupings Across the Included Studies**

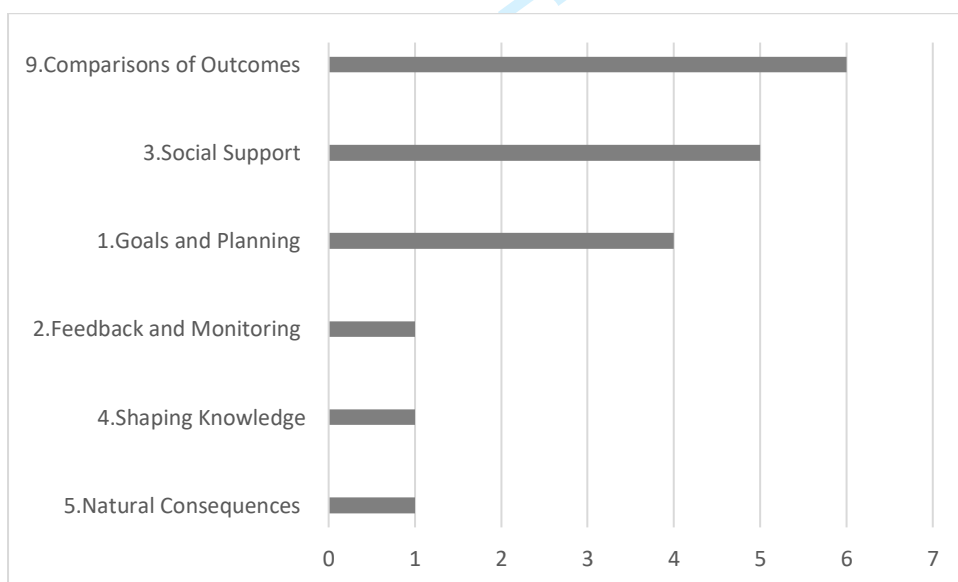

1  
2  
3  
4  
5  
6  
7  
8  
9  
10  
11  
12  
13  
14  
15  
16  
17  
18  
19  
20  
21  
22  
23  
24  
25  
26  
27  
28  
29  
30  
31  
32  
33  
34  
35  
36  
37  
38  
39  
40  
41  
42  
43  
44  
45  
46

Supplementary Materials 1

Prisma Checklist

| Section and Topic             | Item # | Checklist item                                                                                                                                                                                                                                                                                       | Location where item is reported |
|-------------------------------|--------|------------------------------------------------------------------------------------------------------------------------------------------------------------------------------------------------------------------------------------------------------------------------------------------------------|---------------------------------|
| <b>TITLE</b>                  |        |                                                                                                                                                                                                                                                                                                      |                                 |
| Title                         | 1      | Identify the report as a systematic review.                                                                                                                                                                                                                                                          | 1                               |
| <b>ABSTRACT</b>               |        |                                                                                                                                                                                                                                                                                                      |                                 |
| Abstract                      | 2      | See the PRISMA 2020 for Abstracts checklist.                                                                                                                                                                                                                                                         | 2                               |
| <b>INTRODUCTION</b>           |        |                                                                                                                                                                                                                                                                                                      |                                 |
| Rationale                     | 3      | Describe the rationale for the review in the context of existing knowledge.                                                                                                                                                                                                                          | 3                               |
| Objectives                    | 4      | Provide an explicit statement of the objective(s) or question(s) the review addresses.                                                                                                                                                                                                               | 3                               |
| <b>METHODS</b>                |        |                                                                                                                                                                                                                                                                                                      |                                 |
| Eligibility criteria          | 5      | Specify the inclusion and exclusion criteria for the review and how studies were grouped for the syntheses.                                                                                                                                                                                          | 7                               |
| Information sources           | 6      | Specify all databases, registers, websites, organisations, reference lists and other sources searched or consulted to identify studies. Specify the date when each source was last searched or consulted.                                                                                            | 7                               |
| Search strategy               | 7      | Present the full search strategies for all databases, registers and websites, including any filters and limits used.                                                                                                                                                                                 | 7                               |
| Selection process             | 8      | Specify the methods used to decide whether a study met the inclusion criteria of the review, including how many reviewers screened each record and each report retrieved, whether they worked independently, and if applicable, details of automation tools used in the process.                     | 8                               |
| Data collection process       | 9      | Specify the methods used to collect data from reports, including how many reviewers collected data from each report, whether they worked independently, any processes for obtaining or confirming data from study investigators, and if applicable, details of automation tools used in the process. | 8                               |
| Data items                    | 10a    | List and define all outcomes for which data were sought. Specify whether all results that were compatible with each outcome domain in each study were sought (e.g. for all measures, time points, analyses), and if not, the methods used to decide which results to collect.                        | 8                               |
|                               | 10b    | List and define all other variables for which data were sought (e.g. participant and intervention characteristics, funding sources). Describe any assumptions made about any missing or unclear information.                                                                                         | 8                               |
| Study risk of bias assessment | 11     | Specify the methods used to assess risk of bias in the included studies, including details of the tool(s) used, how many reviewers assessed each study and whether they worked independently, and if applicable, details of automation tools used in the process.                                    | 8                               |
| Effect measures               | 12     | Specify for each outcome the effect measure(s) (e.g. risk ratio, mean difference) used in the synthesis or presentation of results.                                                                                                                                                                  | 8                               |
| Synthesis methods             | 13a    | Describe the processes used to decide which studies were eligible for each synthesis (e.g. tabulating the study intervention characteristics and comparing against the planned groups for each synthesis (item #5)).                                                                                 | 9                               |
|                               | 13b    | Describe any methods required to prepare the data for presentation or synthesis, such as handling of missing summary statistics, or data conversions.                                                                                                                                                | N/A                             |

| Section and Topic             | Item # | Checklist item                                                                                                                                                                                                                                                                       | Location where item is reported |
|-------------------------------|--------|--------------------------------------------------------------------------------------------------------------------------------------------------------------------------------------------------------------------------------------------------------------------------------------|---------------------------------|
|                               | 13c    | Describe any methods used to tabulate or visually display results of individual studies and syntheses.                                                                                                                                                                               | N/A                             |
|                               | 13d    | Describe any methods used to synthesize results and provide a rationale for the choice(s). If meta-analysis was performed, describe the model(s), method(s) to identify the presence and extent of statistical heterogeneity, and software package(s) used.                          | N/A                             |
|                               | 13e    | Describe any methods used to explore possible causes of heterogeneity among study results (e.g. subgroup analysis, meta-regression).                                                                                                                                                 | N/A                             |
|                               | 13f    | Describe any sensitivity analyses conducted to assess robustness of the synthesized results.                                                                                                                                                                                         | N/A                             |
| Reporting bias assessment     | 14     | Describe any methods used to assess risk of bias due to missing results in a synthesis (arising from reporting biases).                                                                                                                                                              | 9                               |
| Certainty assessment          | 15     | Describe any methods used to assess certainty (or confidence) in the body of evidence for an outcome.                                                                                                                                                                                | N/A                             |
| <b>RESULTS</b>                |        |                                                                                                                                                                                                                                                                                      |                                 |
| Study selection               | 16a    | Describe the results of the search and selection process, from the number of records identified in the search to the number of studies included in the review, ideally using a flow diagram.                                                                                         | 10                              |
|                               | 16b    | Cite studies that might appear to meet the inclusion criteria, but which were excluded, and explain why they were excluded.                                                                                                                                                          | 11                              |
| Study characteristics         | 17     | Cite each included study and present its characteristics.                                                                                                                                                                                                                            | 12                              |
| Risk of bias in studies       | 18     | Present assessments of risk of bias for each included study.                                                                                                                                                                                                                         | 18                              |
| Results of individual studies | 19     | For all outcomes, present, for each study: (a) summary statistics for each group (where appropriate) and (b) an effect estimate and its precision (e.g. confidence/credible interval), ideally using structured tables or plots.                                                     | 16                              |
| Results of syntheses          | 20a    | For each synthesis, briefly summarise the characteristics and risk of bias among contributing studies.                                                                                                                                                                               | N/A                             |
|                               | 20b    | Present results of all statistical syntheses conducted. If meta-analysis was done, present for each the summary estimate and its precision (e.g. confidence/credible interval) and measures of statistical heterogeneity. If comparing groups, describe the direction of the effect. | N/A                             |
|                               | 20c    | Present results of all investigations of possible causes of heterogeneity among study results.                                                                                                                                                                                       | N/A                             |
|                               | 20d    | Present results of all sensitivity analyses conducted to assess the robustness of the synthesized results.                                                                                                                                                                           | N/A                             |
| Reporting biases              | 21     | Present assessments of risk of bias due to missing results (arising from reporting biases) for each synthesis assessed.                                                                                                                                                              | N/A                             |
| Certainty of evidence         | 22     | Present assessments of certainty (or confidence) in the body of evidence for each outcome assessed.                                                                                                                                                                                  | N/A                             |
| <b>DISCUSSION</b>             |        |                                                                                                                                                                                                                                                                                      |                                 |
| Discussion                    | 23a    | Provide a general interpretation of the results in the context of other evidence.                                                                                                                                                                                                    | 24                              |
|                               | 23b    | Discuss any limitations of the evidence included in the review.                                                                                                                                                                                                                      | 26                              |
|                               | 23c    | Discuss any limitations of the review processes used.                                                                                                                                                                                                                                | 26                              |



1  
2  
3  
4  
5  
6  
7  
8  
9  
10  
11  
12  
13  
14  
15  
16  
17  
18  
19  
20  
21  
22  
23  
24  
25  
26  
27  
28  
29  
30  
31  
32  
33  
34  
35  
36  
37  
38  
39  
40  
41  
42  
43  
44  
45  
46

| Section and Topic                              | Item # | Checklist item                                                                                                                                                                                                                             | Location where item is reported |
|------------------------------------------------|--------|--------------------------------------------------------------------------------------------------------------------------------------------------------------------------------------------------------------------------------------------|---------------------------------|
|                                                | 23d    | Discuss implications of the results for practice, policy, and future research.                                                                                                                                                             | 27                              |
| <b>OTHER INFORMATION</b>                       |        |                                                                                                                                                                                                                                            |                                 |
| Registration and protocol                      | 24a    | Provide registration information for the review, including register name and registration number, or state that the review was not registered.                                                                                             | 7                               |
|                                                | 24b    | Indicate where the review protocol can be accessed, or state that a protocol was not prepared.                                                                                                                                             | 7                               |
|                                                | 24c    | Describe and explain any amendments to information provided at registration or in the protocol.                                                                                                                                            | N/A                             |
| Support                                        | 25     | Describe sources of financial or non-financial support for the review, and the role of the funders or sponsors in the review.                                                                                                              | 30                              |
| Competing interests                            | 26     | Declare any competing interests of review authors.                                                                                                                                                                                         | 30                              |
| Availability of data, code and other materials | 27     | Report which of the following are publicly available and where they can be found: template data collection forms; data extracted from included studies; data used for all analyses; analytic code; any other materials used in the review. | Supplementary Files             |

## Supplementary Materials 2

## Ovid Medline Search Strategy Example

- 1 (Social adj4 (prescri\* or referral or intervention)).mp.
- 2 (community adj4 (prescri\* or referral or intervention)).mp.
- 3 linking scheme\*.mp.
- 4 u3a.mp.
- 5 university of the third age.mp.
- 6 buddy scheme\*.mp.
- 7 men's shed.mp.
- 8 (prescri\* adj4 (exercis\* or education or learning or arts)).mp.
- 9 information referral.mp.
- 10 social referral.mp.
- 11 green gym.mp.
- 12 time bank.mp.
- 13 supported referral.mp.
- 14 (well-being adj2 referral).mp.
- 15 (wellbeing adj2 referral).mp.
- 16 ecotherapy.mp.
- 17 Individual Placement.mp.
- 18 supported employment.mp.
- 19 non-medical referral.mp.
- 20 non-clinical referral.mp.
- 21 or/1-20
- 22 Mental Health/  
23 mental disorders/ or anxiety disorders/ or "bipolar and related disorders"/ or "disruptive, impulse control, and conduct disorders"/ or dissociative disorders/ or "feeding and eating disorders"/ or mood disorders/ or personality disorders/ or somatoform disorders/ or "trauma and stressor related disorders"/
- 24 mental\* ill\*.mp.
- 25 Depression/  
26 exp Anxiety/  
27 wellbeing.mp.
- 28 well-being.mp.
- 29 psychiatric disorder\*.mp.
- 30 psychiatric problem.mp.

1  
2  
3  
4  
5  
6  
7  
8  
9  
10  
11  
12  
13  
14  
15  
16  
17  
18  
19  
20  
21  
22  
23  
24  
25  
26  
27  
28  
29  
30  
31  
32  
33  
34  
35  
36  
37  
38  
39  
40  
41  
42  
43  
44  
45  
46  
47  
48  
49  
50  
51  
52  
53  
54  
55  
56  
57  
58  
59  
60

- 31 non-medical symptoms.mp.
- 32 psycho-social problem\*.mp.
- 33 psychosocial problem\*.mp.
- 34 mups.mp.
- 35 medically unexplained physical symptoms.mp.
- 36 non-medical problem.mp.
- 37 mental difficult\*.mp.
- 38 recovery.mp.
- 39 Mental Health Recovery/  
40 social function\*.mp.  
41 or/22-40  
42 21 and 41

For peer review only

## Supplementary Materials 3

## Additional tables

**Methodological Quality Assessment**

| <b>CASP Randomised Control Trial Checklist</b>                                       | <b>Study</b>                        |
|--------------------------------------------------------------------------------------|-------------------------------------|
| Max 22                                                                               | Afuwape et al. 2010 <sup>(22)</sup> |
| Did the trial address a clearly focused issue?                                       | Yes                                 |
| Was the assignment of patients to treatments randomised?                             | Yes                                 |
| Were all of the patients who entered the trial properly accounted for at conclusion? | Yes                                 |
| Were patients, health workers and study personnel 'blind' to treatment?              | Yes                                 |
| Were the groups similar at the start of the trial?                                   | Yes                                 |
| Aside from the experimental intervention, were the groups treated equally?           | Yes                                 |
| How large was the treatment effect?                                                  | Unclear                             |
| How precise was the estimate of the treatment?                                       | Unclear                             |
| Can the results be applied to the local population or in your context?               | Yes                                 |
| Were all clinically important outcomes considered?                                   | Yes                                 |
| Are the benefits worth the harms and costs?                                          | Yes                                 |
| <b>Total CASP Checklist score<br/>(Yes=2, Unclear = 1, No =0)</b>                    | 20                                  |

1  
2  
3  
4  
5  
6  
7  
8  
9  
10  
11  
12  
13  
14  
15  
16  
17  
18  
19  
20  
21  
22  
23  
24  
25  
26  
27  
28  
29  
30  
31  
32  
33  
34  
35  
36  
37  
38  
39  
40  
41  
42  
43  
44  
45  
46

| <b>CASP Cohort Checklist</b>                                                          | <b>Study</b>                       |
|---------------------------------------------------------------------------------------|------------------------------------|
| Max 24                                                                                | Carnes et al. 2017 <sup>(23)</sup> |
| Did the study address a clearly focussed issue?                                       | Yes                                |
| Was the cohort recruited in an acceptable way?                                        | Yes                                |
| Was the exposure accurately measured to minimise bias?                                | Yes                                |
| Was the outcome accurately measures to minimise bias?                                 | Yes                                |
| (A) Have the authors identified all important confounding factor's?                   | Yes                                |
| (B) Have they taken account of the confounding factors in the design and/or analysis? | Yes                                |
| (A) Was the follow up of subjects complete enough?                                    | Yes                                |
| (B) Was the follow up of subjects long enough?                                        | Yes                                |
| What were the results of this study?                                                  | Yes                                |
| How precise are the results?                                                          | Unclear                            |
| Do you believe the results?                                                           | Yes                                |
| Can the results be applied to the local population?                                   | Yes                                |
| <b>Total CASP Checklist score</b><br><i>(Yes=2, Unclear = 1, No =0)</i>               | <b>23</b>                          |

| NIHR Pre/Post Checklist                                                                                                                                               | Study                                     |                                   |                                   |                                   |                                     |                                   |                                    |                                      |                                    |                                     |
|-----------------------------------------------------------------------------------------------------------------------------------------------------------------------|-------------------------------------------|-----------------------------------|-----------------------------------|-----------------------------------|-------------------------------------|-----------------------------------|------------------------------------|--------------------------------------|------------------------------------|-------------------------------------|
| Max 24                                                                                                                                                                | van de Venter et al. 2014 <sup>(33)</sup> | Crone et al. 2013 <sup>(24)</sup> | Crone et al. 2018 <sup>(25)</sup> | Jones et al. 2013 <sup>(26)</sup> | Kellezi et al. 2019 <sup>(27)</sup> | Maund et al. 2019 <sup>(28)</sup> | Morton et al. 2019 <sup>(29)</sup> | Peschery et al. 2019 <sup>(30)</sup> | Sumner et al. 2019 <sup>(31)</sup> | Thomson et al. 2018 <sup>(32)</sup> |
| Was the study question or objective clearly stated?                                                                                                                   | Yes                                       | Yes                               | Yes                               | Yes                               | Yes                                 | Yes                               | Yes                                | Yes                                  | Yes                                | Yes                                 |
| Were eligibility/ selection criteria for the study population prespecified and clearly described?                                                                     | Yes                                       | No                                | No                                | Yes                               | No                                  | Yes                               | No                                 | Yes                                  | Yes                                | Yes                                 |
| Were the participants in the study representative of those who would be eligible for the test/service/intervention in the general or clinical population of interest? | Yes                                       | Yes                               | Yes                               | Yes                               | Unclear                             | Yes                               | Yes                                | Yes                                  | Yes                                | Yes                                 |
| Were all eligible participants that met the prespecified entry criteria enrolled?                                                                                     | No                                        | Yes                               | Unclear                           | No                                | Unclear                             | No                                | Not Reported                       | Unclear                              | Unclear                            | Unclear                             |
| Was the sample size sufficiently large to provide confidence in the findings?                                                                                         | Not Reported                              | Not Reported                      | Unclear                           | Not Reported                      | Yes                                 | NR                                | Not Reported                       | Unclear                              | Unclear                            | Unclear                             |
| Was the test/service/intervention clearly described and delivered consistently across the study population?                                                           | Yes                                       | Unclear                           | Yes                               | Yes                               | Yes                                 | Yes                               | No                                 | Yes                                  | No                                 | Unclear                             |
| Were the outcome measures prespecified, clearly defined, valid, reliable, and assessed consistently across all study participants?                                    | Yes                                       | No                                | Yes                               | Yes                               | No                                  | Yes                               | Yes                                | Yes                                  | Yes                                | Yes                                 |
| Were the people assessing the outcomes blinded to the participants' exposures/interventions?                                                                          | No                                        | No                                | No                                | No                                | No                                  | No                                | No                                 | No                                   | No                                 | No                                  |
| Was the loss to follow-up after baseline 20% or less? Were those lost to follow-up accounted for in the analysis?                                                     | NR                                        | No                                | No                                | No                                | No                                  | NR                                | No                                 | No                                   | No                                 | NR                                  |
| Did the statistical methods examine changes in outcome measures from before to after the                                                                              | Yes                                       | Unclear                           | Unclear                           | Yes                               | Yes                                 | Yes                               | Yes                                | Yes                                  | Yes                                | Yes                                 |

1  
2  
3  
4  
5  
6  
7  
8  
9  
10  
11  
12  
13  
14  
15  
16  
17  
18  
19  
20  
21  
22  
23  
24  
25  
26  
27  
28  
29  
30  
31  
32  
33  
34  
35  
36  
37  
38  
39  
40  
41  
42  
43  
44  
45  
46

|                                                                                                                                                                                  |    |    |    |    |    |    |    |    |    |    |
|----------------------------------------------------------------------------------------------------------------------------------------------------------------------------------|----|----|----|----|----|----|----|----|----|----|
| intervention? Were statistical tests done that provided p values for the pre-to-post changes?                                                                                    |    |    |    |    |    |    |    |    |    |    |
| Were outcome measures of interest taken multiple times before the intervention and multiple times after the intervention (i.e., did they use an interrupted time-series design)? | No |
| <b>Total CASP Checklist score (Yes=2, Unclear = 1, No =0)</b>                                                                                                                    | 16 | 11 | 13 | 15 | 10 | 15 | 10 | 14 | 14 | 15 |

For peer review only

## Supplementary Materials 4

**Fidelity Assessment**

| Study                                                                                      | Afuwa<br>pe et<br>al.,<br>2010 <sup>(22)</sup> | Carn<br>es et<br>al.,<br>2017 <sup>(23)</sup> | van de<br>Venter<br>et al.,<br>2014 <sup>(33)</sup> | Cron<br>e et<br>al.,<br>2013 <sup>(24)</sup> | Cron<br>e et<br>al.,<br>2018 <sup>(25)</sup> | Jone<br>s et<br>al.,<br>2013 <sup>(26)</sup> | Kelle<br>zi et<br>al.,<br>2019 <sup>(27)</sup> | Maun<br>d et<br>al.,201<br>9 <sup>(28)</sup> | Morto<br>n et<br>al.,201<br>5 <sup>(29)</sup> | Pesch<br>eny et<br>al.,201<br>9 <sup>(30)</sup> | Sumner<br>et<br>al.,2019 <sup>(31)</sup> | Thoms<br>on et<br>al.,201<br>8 <sup>(32)</sup> |
|--------------------------------------------------------------------------------------------|------------------------------------------------|-----------------------------------------------|-----------------------------------------------------|----------------------------------------------|----------------------------------------------|----------------------------------------------|------------------------------------------------|----------------------------------------------|-----------------------------------------------|-------------------------------------------------|------------------------------------------|------------------------------------------------|
| <b>1) Treatment fidelity strategies for design of study</b>                                |                                                |                                               |                                                     |                                              |                                              |                                              |                                                |                                              |                                               |                                                 |                                          |                                                |
| Ensure same treatment dose within conditions                                               | Yes                                            | Yes                                           | Yes                                                 | Yes                                          | Yes                                          | Yes                                          | UC                                             | No                                           | Yes                                           | Yes                                             | Yes                                      | Yes                                            |
| Ensure equivalent dose across conditions                                                   | UC                                             | UC                                            | N/A                                                 | N/A                                          | N/A                                          | N/A                                          | N/A                                            | N/A                                          | N/A                                           | N/A                                             | N/A                                      | N/A                                            |
| Plan for implementation setbacks                                                           | Yes                                            | Yes                                           | Yes                                                 | Yes                                          | Yes                                          | Yes                                          | UC                                             | Yes                                          | Yes                                           | Yes                                             | Yes                                      | No                                             |
| <b>2) Treatment fidelity strategies for monitoring and improving provider training</b>     |                                                |                                               |                                                     |                                              |                                              |                                              |                                                |                                              |                                               |                                                 |                                          |                                                |
| Standardize training                                                                       | Yes                                            | Yes                                           | UC                                                  | UC                                           | UC                                           | Yes                                          | UC                                             | Yes                                          | Yes                                           | UC                                              | UC                                       | No                                             |
| Ensure provider skill acquisition                                                          | Yes                                            | Yes                                           | UC                                                  | UC                                           | UC                                           | Yes                                          | UC                                             | UC                                           | NR                                            | UC                                              | UC                                       | No                                             |
| Minimize “drift” in provider skills                                                        | NR                                             | NR                                            | UC                                                  | UC                                           | UC                                           | Yes                                          | UC                                             | UC                                           | NR                                            | UC                                              | UC                                       | No                                             |
| Accommodate provider differences                                                           | Yes                                            | Yes                                           | UC                                                  | Yes                                          | Yes                                          | UC                                           | UC                                             | UC                                           | NR                                            | UC                                              | Yes                                      | No                                             |
| <b>3) Treatment fidelity strategies for monitoring and improving delivery of treatment</b> |                                                |                                               |                                                     |                                              |                                              |                                              |                                                |                                              |                                               |                                                 |                                          |                                                |
| Control for provider differences                                                           | Yes                                            | Yes                                           | Yes                                                 | No                                           | No                                           | UC                                           | UC                                             | UC                                           | Yes                                           | Yes                                             | No                                       | UC                                             |
| Reduce differences within treatment                                                        | No                                             | No                                            | Yes                                                 | No                                           | No                                           | No                                           | UC                                             | No                                           | Yes                                           | UC                                              | No                                       | No                                             |
| Ensure adherence to treatment protocol                                                     | NR                                             | NR                                            | Yes                                                 | UC                                           | UC                                           | UC                                           | UC                                             | Yes                                          | N/A                                           | UC                                              | UC                                       | UC                                             |
| Minimize contamination between conditions                                                  | Yes                                            | Yes                                           | N/A                                                 | UC                                           | UC                                           | Yes                                          | UC                                             | No                                           | N/A                                           | N/A                                             | UC                                       | Yes                                            |
| <b>4) Treatment fidelity strategies for monitoring and improving receipt of treatment</b>  |                                                |                                               |                                                     |                                              |                                              |                                              |                                                |                                              |                                               |                                                 |                                          |                                                |
| Ensure participant comprehension                                                           | Yes                                            | Yes                                           | UC                                                  | No                                           | No                                           | No                                           | UC                                             | UC                                           | Yes                                           | UC                                              | No                                       | UC                                             |



1  
2  
3  
4  
5  
6  
7  
8  
9  
10  
11  
12  
13  
14  
15  
16  
17  
18  
19  
20  
21  
22  
23  
24  
25  
26  
27  
28  
29  
30  
31  
32  
33  
34  
35  
36  
37  
38  
39  
40  
41  
42  
43  
44  
45  
46

|                                                                                                    |     |     |    |    |    |     |    |    |    |    |    |    |
|----------------------------------------------------------------------------------------------------|-----|-----|----|----|----|-----|----|----|----|----|----|----|
| Ensure participant ability to use cognitive skills                                                 | Yes | Yes | UC | No | No | No  | UC | UC | NR | UC | No | UC |
| Ensure participant ability to perform behavioral skills                                            | UC  | UC  | UC | UC | UC | Yes | UC | UC | NR | UC | UC | UC |
| <b>5) Treatment fidelity strategies for monitoring and improving enactment of treatment skills</b> |     |     |    |    |    |     |    |    |    |    |    |    |
| Ensure participant use of cognitive skills                                                         | UC  | UC  | No | UC | UC | No  | UC | UC | NR | No | UC | UC |
| Ensure participant use of behavioral skills                                                        | UC  | UC  | No | UC | UC | UC  | UC | UC | NR | No | UC | UC |

UC- unclear  
 NR-not reported  
 N/A – not applicable

For peer review only

1  
2  
3  
4  
5  
6  
7  
8  
9  
10  
11  
12  
13  
14  
15  
16  
17  
18  
19  
20  
21  
22  
23  
24  
25  
26  
27  
28  
29  
30  
31  
32  
33  
34  
35  
36  
37  
38  
39  
40  
41  
42  
43  
44  
45  
46

For peer review only

1  
2  
3  
4  
5  
6  
7  
8  
9  
10  
11  
12  
13  
14  
15  
16  
17  
18  
19  
20  
21  
22  
23  
24  
25  
26  
27  
28  
29  
30  
31  
32  
33  
34  
35  
36  
37  
38  
39  
40  
41  
42  
43  
44  
45  
46

Supplementary Materials 5

**Person Centredness**

| Study                                                                                                                                                       | Afuwa<br>pe et<br>al.,<br>2010 <sup>(22)</sup> | Carnes<br>et al.,<br>2017 <sup>(23)</sup> | van de<br>Venter<br>et al.,<br>2014 <sup>(33)</sup> | Crone<br>et al.,<br>2013 <sup>(24)</sup> | Crone<br>et al.,<br>2018 <sup>(25)</sup> | Jones<br>et al.,<br>2013 <sup>(26)</sup> | Kellezi<br>et al.,<br>2019 <sup>(27)</sup> | Maun<br>d et<br>al.,201<br>9 <sup>(28)</sup> | Morto<br>n et<br>al.,201<br>5 <sup>(29)</sup> | Pesch<br>eny et<br>al.,201<br>9 <sup>(30)</sup> | Sumne<br>r et<br>al.,201<br>9 <sup>(31)</sup> | Thoms<br>on et<br>al.,201<br>8 <sup>(32)</sup> |
|-------------------------------------------------------------------------------------------------------------------------------------------------------------|------------------------------------------------|-------------------------------------------|-----------------------------------------------------|------------------------------------------|------------------------------------------|------------------------------------------|--------------------------------------------|----------------------------------------------|-----------------------------------------------|-------------------------------------------------|-----------------------------------------------|------------------------------------------------|
| <b>Personal needs assessment conducted (social, emotional or practical needs)</b>                                                                           | Yes                                            | Yes                                       | NR                                                  | UC                                       | No                                       | UC                                       | Yes                                        | UC                                           | Yes                                           | Yes                                             | NR                                            | No                                             |
| <b>Choice of SP activities offered?</b>                                                                                                                     | No                                             | Yes                                       | Yes                                                 | UC                                       | Yes                                      | UC                                       | Yes                                        | UC                                           | Yes                                           | Yes                                             | NR                                            | No                                             |
| <b>Person actively involved in discussions to establish their preferences/ values on the available SP options to improve their health and/ or wellbeing</b> | Yes                                            | Yes                                       | NR                                                  | UC                                       | No                                       | UC                                       | Yes                                        | UC                                           | Yes                                           | Yes                                             | NR                                            | No                                             |
| <b>Person received a SP consistent with their choice</b>                                                                                                    | No                                             | Yes                                       | NR                                                  | UC                                       | No                                       | UC                                       | Yes                                        | UC                                           | UC                                            | No                                              | NR                                            | No                                             |

1  
2  
3  
4  
5  
6  
7  
8  
9  
10  
11  
12  
13  
14  
15  
16  
17  
18  
19  
20  
21  
22  
23  
24  
25  
26  
27  
28  
29  
30  
31  
32  
33  
34  
35  
36  
37  
38  
39  
40  
41  
42  
43  
44  
45  
46

For peer review only

1  
2  
3  
4  
5  
6  
7  
8  
9  
10  
11  
12  
13  
14  
15  
16  
17  
18  
19  
20  
21  
22  
23  
24  
25  
26  
27  
28  
29  
30  
31  
32  
33  
34  
35  
36  
37  
38  
39  
40  
41  
42  
43  
44  
45  
46

Supplementary Materials 6

**Intervention Development Processes**

| Study                                             |                         | Afuwape et al., 2010 <sup>(22)</sup> | Carne et al., 2017 <sup>(23)</sup> | van de Ven et al., 2014 <sup>(3)</sup> | Crone et al., 2013 <sup>(24)</sup> | Crone et al., 2018 <sup>(25)</sup> | Jones et al., 2013 <sup>(26)</sup> | Kellezi et al., 2019 <sup>(27)</sup> | Maund et al., 2019 <sup>(28)</sup> | Morton et al., 2015 <sup>(29)</sup> | Pescheny et al., 2019 <sup>(30)</sup> | Sumner et al., 2019 <sup>(31)</sup> | Thomson et al., 2018 <sup>(32)</sup> |
|---------------------------------------------------|-------------------------|--------------------------------------|------------------------------------|----------------------------------------|------------------------------------|------------------------------------|------------------------------------|--------------------------------------|------------------------------------|-------------------------------------|---------------------------------------|-------------------------------------|--------------------------------------|
| <b>Evidence of Systematic Development</b>         | Yes/No                  | UC                                   | No                                 | Yes                                    | No                                 | No                                 | No                                 | No                                   | No                                 | Yes                                 | Yes                                   | Yes                                 | Yes                                  |
|                                                   | Framework used          |                                      |                                    | MRC                                    |                                    |                                    |                                    |                                      |                                    | No                                  | No                                    | No                                  | No                                   |
|                                                   | Best available evidence | Yes                                  | No                                 | No                                     | UC                                 | UC                                 | UC                                 | Yes                                  | Yes                                | Yes                                 | No                                    | Yes                                 | Yes                                  |
|                                                   | Needs assessments       | UC                                   | No                                 | No                                     | No                                 | No                                 | No                                 | No                                   | No                                 | Yes                                 | Yes                                   | No                                  | No                                   |
|                                                   | Evidence of testing     | No                                   | No                                 | No                                     | No                                 | No                                 | No                                 | No                                   | No                                 | Yes                                 | Yes                                   | No                                  | No                                   |
| <b>Underpinned by Theory Co-design/production</b> | Yes/No                  | No                                   | No                                 | No                                     | No                                 | No                                 | No                                 | No                                   | No                                 | No                                  | No                                    | No                                  | No                                   |
|                                                   | Which one               | N/A                                  | N/A                                | N/A                                    | N/A                                | N/A                                | N/A                                | N/A                                  | N/A                                | N/A                                 | N/A                                   | N/A                                 | N/A                                  |
|                                                   | Yes/No who              | No                                   | Yes                                | No                                     | No                                 | No                                 | No                                 | No                                   | No                                 | Yes                                 | Yes                                   | UC                                  | No                                   |
|                                                   |                         |                                      | Service User                       |                                        |                                    |                                    |                                    |                                      |                                    | Service User                        | Needs Assessment                      |                                     |                                      |

# BMJ Open

## The Effectiveness and Active Ingredients of Social Prescribing Interventions Targeting Mental Health: A Systematic Review

|                                 |                                                                                                                                                                                                                                                                                                                                                       |
|---------------------------------|-------------------------------------------------------------------------------------------------------------------------------------------------------------------------------------------------------------------------------------------------------------------------------------------------------------------------------------------------------|
| Journal:                        | <i>BMJ Open</i>                                                                                                                                                                                                                                                                                                                                       |
| Manuscript ID                   | bmjopen-2021-060214.R1                                                                                                                                                                                                                                                                                                                                |
| Article Type:                   | Original research                                                                                                                                                                                                                                                                                                                                     |
| Date Submitted by the Author:   | 10-Jun-2022                                                                                                                                                                                                                                                                                                                                           |
| Complete List of Authors:       | Cooper, Matthew; Teesside University, Avery, Leah; Teesside University, School of Health & Life Sciences<br>Scott, Jason; Northumbria University, Faculty of health and life sciences<br>Ashley, Kirsten; Teesside University<br>Jordan, Cara; Teesside University<br>Errington, Linda; Newcastle University<br>Flynn, Darren; Northumbria University |
| <b>Primary Subject Heading</b>: | Mental health                                                                                                                                                                                                                                                                                                                                         |
| Secondary Subject Heading:      | Public health, Health services research                                                                                                                                                                                                                                                                                                               |
| Keywords:                       | MENTAL HEALTH, PUBLIC HEALTH, PRIMARY CARE                                                                                                                                                                                                                                                                                                            |
|                                 |                                                                                                                                                                                                                                                                                                                                                       |

SCHOLARONE™  
Manuscripts



I, the Submitting Author has the right to grant and does grant on behalf of all authors of the Work (as defined in the below author licence), an exclusive licence and/or a non-exclusive licence for contributions from authors who are: i) UK Crown employees; ii) where BMJ has agreed a CC-BY licence shall apply, and/or iii) in accordance with the terms applicable for US Federal Government officers or employees acting as part of their official duties; on a worldwide, perpetual, irrevocable, royalty-free basis to BMJ Publishing Group Ltd ("BMJ") its licensees and where the relevant Journal is co-owned by BMJ to the co-owners of the Journal, to publish the Work in this journal and any other BMJ products and to exploit all rights, as set out in our [licence](#).

The Submitting Author accepts and understands that any supply made under these terms is made by BMJ to the Submitting Author unless you are acting as an employee on behalf of your employer or a postgraduate student of an affiliated institution which is paying any applicable article publishing charge ("APC") for Open Access articles. Where the Submitting Author wishes to make the Work available on an Open Access basis (and intends to pay the relevant APC), the terms of reuse of such Open Access shall be governed by a Creative Commons licence – details of these licences and which [Creative Commons](#) licence will apply to this Work are set out in our licence referred to above.

Other than as permitted in any relevant BMJ Author's Self Archiving Policies, I confirm this Work has not been accepted for publication elsewhere, is not being considered for publication elsewhere and does not duplicate material already published. I confirm all authors consent to publication of this Work and authorise the granting of this licence.

# The Effectiveness and Active Ingredients of Social Prescribing Interventions Targeting Mental Health: A Systematic Review

Matthew Cooper<sup>1</sup>, Leah Avery<sup>1</sup>, Jason Scott<sup>2</sup>, Kirsten Ashley<sup>1</sup>, Cara Jordan<sup>1</sup>, Linda Errington<sup>3</sup>, Darren Flynn<sup>\*4</sup>

<sup>1</sup> School of Health and Life Sciences, Teesside University, Tees Valley, UK, <sup>2</sup> Department of Social Work, Education and Community Wellbeing, Northumbria University, Newcastle upon Tyne, UK, <sup>3</sup> School of Biomedical, Nutritional, and Sport Sciences, Newcastle University, Newcastle upon Tyne, UK, <sup>4</sup> Department of Nursing, Midwifery and Health, Faculty of Health and Life Sciences, Northumbria University, Newcastle upon Tyne, UK

\*Correspondence: [darren.flynn@northumbria.ac.uk](mailto:darren.flynn@northumbria.ac.uk)  
Department of Nursing, Midwifery and Health, Faculty of Health and Life Sciences, Northumbria University, Newcastle upon Tyne, UK.

Word Count: 5,066

(Excluding title page, abstract, strengths and limitations, references, endnotes, three figures, and two tables and supplementary material)

**KEYWORDS:** Mental Health, Public Health, Primary Care



## ABSTRACT

**Objective** To establish the effectiveness and active ingredients of UK-based social prescribing interventions targeting mental health and well-being outcomes.

**Design** Systematic review adhering to PRISMA guidelines, and a published protocol.

**Data Sources** Nine databases were systematically searched up to March 2022.

**Eligibility Criteria** Social prescribing interventions in the UK involving adults aged  $\geq 18$  years, which reported on mental health outcomes.

**Data extraction and synthesis** Two reviewers extracted data on study characteristics; outcomes; referral pathways; treatment fidelity strategies; person-centredness; intervention development processes; and theory-linked Behaviour Change Techniques (BCTs). Data were narratively synthesised.

**Results** 52,074 records were retrieved by the search, 13 interventions reported across 17 studies were included in this review (N=5,036 participants at post-intervention). Fifteen studies were uncontrolled before and after designs, one a randomised controlled trial and one a matched groups design. The most frequently reported referral pathway was the link worker model (n=12), followed by direct referrals from community services (n=3). Participants were predominantly working age adults, and were referred for anxiety, depression, social isolation, and loneliness. 16 out of 17 studies reported statistically significant improvements in outcomes (mental health, mental wellbeing, general health, or quality of life). Strategies to enhance treatment fidelity were sub-optimal across studies. Only two studies utilised a specific theoretical framework. Few studies reported engaging service users in co-design (n=2) or usability and/or feasibility testing (n=4). Overall, 22 BCTs were coded across 13 interventions. The most frequently coded BCTs were social support-unspecified (n=11), credible source (n=7) and social support-practical (n=6).

**Conclusions** Robust conclusions on the effectiveness of social prescribing for mental health-related outcomes cannot be made. Future research would benefit from comprehensive intervention developmental processes, with reference to appropriate theory, alongside long-

1  
2  
3 term follow-up outcome assessment, utilising treatment fidelity strategies, and a focus on  
4  
5 principle of person-centred care.  
6

7 **PROSPERO registration number:** CRD42020167887  
8  
9  
10  
11  
12  
13  
14  
15  
16  
17  
18  
19  
20  
21  
22  
23  
24  
25  
26  
27  
28  
29  
30  
31  
32  
33  
34  
35  
36  
37  
38  
39  
40  
41  
42  
43  
44  
45  
46  
47  
48  
49  
50  
51  
52  
53  
54  
55  
56  
57  
58  
59  
60

For peer review only

### STRENGTHS AND LIMITATIONS OF THIS STUDY

- The methodological approach undertaken identified active ingredients within effective social prescribing interventions as well as the overall impact of the interventions on mental health and wellbeing outcomes
- This review highlighted that a large proportion of individuals referred to social prescribing interventions fail to engage. This emphasises the importance of involving service users in the design and evaluation of social prescribing interventions
- Heterogeneity of study designs, populations, interventions, and outcome measures prevented the conduct of a meta-analysis
- Robust conclusions on the effectiveness of social prescribing for mental health- related outcomes cannot be established due to issues with methodological quality

## INTRODUCTION

Social prescribing is a complex intervention that aims to provide holistic support and care to people living with a range of long-term health problems.[1] It is defined by the Social Prescribing Network as ‘a means of enabling general practitioners and other frontline healthcare professionals to refer patients to a link worker’ from which a link worker will co-produce an action plan to address what matters to the individual.[2]

NHS England included social prescribing as one of the six pillars of a Universal Personalised Care Strategy,[3] and have a target to recruit additional link workers to help reach 900,000 individuals by 2023.[3] This is despite several systematic reviews reporting that the evidence for the (cost-)effectiveness of social prescribing is mixed, with most studies having important methodological limitations, including absence of comparison groups,[4] disparity in follow-up periods,[4] absence of clear and focused objectives[5] and no statement of underpinning model or theory informing intervention content or components.[6]

To determine what works (or does not work) within social prescribing interventions, there is a pressing need to identify ‘active ingredients’ of social prescribing interventions such as mode of delivery, duration, intensity, underpinning theory/ model of behavioural change and theory-linked behaviour change techniques. Identification of these active ingredients will help to inform the design and evaluation of future social prescribing interventions, including optimisation of existing interventions. Kimberlee et al,[7] and Husk et al,[8] describe four models of social prescribing (referral pathways): signposting service users to appropriate services or groups; direct referral from primary care to an activity or service; a link worker (based within or externally to primary care) who receives referrals and in turn conducts a needs assessment and refers the service user onto an activity or service; and the latter model with the addition of feedback and a support loop between the link worker and the service user. This has been supported by purposive action, particularly influenced by the language of

1  
2  
3 prescribing in primary care, to enhance the implementation of social prescribing in primary  
4 care.[9]  
5  
6  
7  
8

9  
10 Approximately one in six adults in the UK are living with mental health conditions[10] and  
11 social prescribing has the potential to improve outcomes for this population. Mental health has  
12 a devastating impact on individuals, their families and society, with depression and anxiety  
13 disorders affecting 16% of the UK population at any one time.[10] A conservative estimate of  
14 the total costs of mental health in the UK in 2019 was £117.9 billion (approximately 5% of  
15 GDP), with 56% and 27% for people aged 15-49 and 50-69 respectively.[11]  
16  
17  
18  
19  
20  
21  
22  
23

24 Previous systematic reviews have evaluated the impact of social prescribing on people living  
25 with a range of health needs and long-term conditions, but without specific focus on elucidating  
26 the evidence of social prescribing interventions for people living with mental health  
27 conditions.[4, 8, 12] We conducted a systematic review to establish the effectiveness, and  
28 active ingredients of UK-based social prescribing interventions targeting mental health.  
29  
30  
31  
32  
33  
34  
35  
36  
37  
38  
39  
40  
41  
42  
43  
44  
45  
46  
47  
48  
49  
50  
51  
52  
53  
54  
55  
56  
57  
58  
59  
60

## **METHODS**

### **Study design**

This systematic review followed a published protocol (CRD42020167887)[13] and adhered to the Preferred Reporting Items for Systematic Review and Meta-Analysis (PRISMA) guidelines.[14] A PRISMA Checklist for this review is presented in supplementary materials 1.

### **Review Criteria**

Included studies were social prescribing interventions (any referral pathway, with or without a link worker based in any setting) involving adults aged  $\geq 18$  years that reported on mental health or well-being outcomes. Studies involving adults with physical health comorbidities were included if the study reported on mental health-related or wellbeing outcomes primarily. Only studies with a primary quantitative study design, published in English and conducted in the United Kingdom (UK) were eligible for inclusion in the review. The decision to restrict the review to UK-based studies was made to ensure relevance and transferability of the findings to the health and social care setting in the UK. Studies were excluded if there was no referral or signposting to either a link worker or group/service and/or did not report any empirical data.

### **Search Strategy**

The following nine databases were searched from inception to 21<sup>st</sup> March 2022: Cochrane Databases of Systematic Reviews (CDSR), The Cochrane Central Register of Controlled Trials (CENTRAL), CINAHL (Cumulative Index of Nursing and Allied Health Literature), Cochrane Protocols, Embase, Medline, PsycInfo, Scopus and Web of Science. Prior to searching, reviewers carried out an extensive exercise to identify and collate potentially relevant terms to cover the concepts of social prescribing and mental health. The search strategy was then developed by an expert information scientist (LE) and adapted as necessary to consider differing indexing terms and other search functionality available in each of the additional databases.

1  
2  
3 The search strategy developed for each database is provided in supplementary file 2.  
4  
5 Reference lists of included studies were searched to identify any further studies to be  
6  
7 considered for eligibility of inclusion.  
8  
9

## 10 11 **Study Selection**

12  
13 All results from electronic database searches were uploaded to EndNote X9 and underwent a  
14  
15 process of de-duplication. One reviewer (MC) screened all titles and abstracts and a second  
16  
17 reviewer (CJ) independently screened 20% of all titles and abstracts. All studies retained  
18  
19 following screening of titles and abstracts were reassessed in full text by the same two  
20  
21 reviewers who worked independently using a study selection form. At stage 1 and 2 of study  
22  
23 selection, any disagreements between the two reviewers that could not be resolved via  
24  
25 discussion were referred to a third reviewer for adjudication (KA or DF). Subsequently, hand  
26  
27 searches of reference lists and citation searching of included studies (using Google Scholar)  
28  
29 were conducted to identify any potentially relevant literature not captured by the electronic  
30  
31 search.  
32  
33

## 34 35 **Data Extraction**

36  
37 A structured data extraction form was used to capture information on study characteristics  
38  
39 (country of origin, aims, design, outcomes targeted, inclusion/exclusion criteria, sampling  
40  
41 method, sample size, follow up period, loss to follow up), components of social prescribing  
42  
43 interventions, methodological quality, extent that interventions were person-centred, treatment  
44  
45 fidelity strategies, comprehensiveness of intervention development processes, and outcome  
46  
47 measures. Data were extracted on three stages of social prescribing (where applicable): initial  
48  
49 assessment, use of a facilitator or link worker, and delivery of socially prescribed activity at a  
50  
51 specific service. Components of the Template for Intervention Description and Replication  
52  
53 (TIDieR)[15] checklist were applied to describe key features of social prescribing interventions.  
54  
55 One reviewer (MC) extracted data on all included studies and a second reviewer (KA) checked  
56  
57  
58  
59  
60

1  
2  
3 data extracted from 50% of included studies. Any discrepancies between the two reviewers  
4  
5 were resolved by discussion and by checking the primary study data.  
6  
7  
8

9  
10 Three reviewers (MC, KA, LA) independently coded the presence of theory-linked BCTs within  
11 included interventions using the BCT Taxonomy v1.[16] The extent that included interventions  
12 adhered to core principles of person-centred care was independently assessed by two  
13 reviewers (MC and KA). A 4-item checklist was designed specifically for this review, with  
14 reference to relevant literature[17-19] in order to record whether: a needs assessment was  
15 conducted with the study participants (i.e., a tailored conversation to discuss their needs and  
16 goals); a choice of social prescribing activity was offered to participants; participants were  
17 actively involving in discussion to elicit their preferences for type of social prescribing activity;  
18 and the participants received a social prescription consistent with their preferred choice of  
19 social prescribing activity.  
20  
21  
22  
23  
24  
25  
26  
27  
28  
29  
30

31  
32 The comprehensiveness of developmental processes for social prescribing interventions were  
33 assessed using a checklist developed in a previous systematic review[20] to record: use of a  
34 framework, theory or model to guide design and evaluation; use of best available evidence  
35 from research (e.g. systematic review); conducting a needs assessment with service users;  
36 evidence of co-production or design with service users; and evidence of piloting or feasibility  
37 testing in the target population.  
38  
39  
40  
41  
42  
43  
44  
45  
46

47 Methodological strategies utilised by included studies to monitor and enhance the reliability  
48 and validity of behavioural interventions (i.e. treatment fidelity strategies) were assessed  
49 independently by three reviewers (MC, KA, DF) using a framework published by Bellg et al.[21]  
50 This framework describes treatment fidelity across five domains: design of the study;  
51 monitoring and improving provider training; monitoring and improving delivery of interventions;  
52 monitoring and improving receipt of interventions; and monitoring and improving enactment of  
53 intervention skills.  
54  
55  
56  
57  
58  
59  
60



1  
2  
3  
4  
5 Any additional articles, grey literature, or media sources that were referenced by included  
6 studies were consulted for the purpose of coding intervention development processes, person  
7 centeredness, fidelity, and BCTs. Where appropriate, data were coded across multiple studies  
8 reporting on the same intervention.  
9  
10  
11  
12  
13  
14  
15

### 16 **Methodological quality assessment**

17  
18 Methodological quality was assessed independently by two reviewers (MC, KA) using the  
19 Critical Appraisal Skills Programme Randomised Control Trial Checklist,[22] National Heart,  
20 Lung and Blood Institute Quality Assessment Tool for Before-After Studies,[23] and ROBINS-I:  
21 tool for assessing risk of bias in non-randomised studies of interventions.[24]  
22  
23  
24  
25  
26  
27  
28

### 29 **Data Synthesis**

30 Data were synthesised narratively due to the heterogeneity of study designs, populations,  
31 interventions (referral pathways, form, and content) and outcome measures (i.e., assessment  
32 methods to assess mental health and well-being). The 'promise' of active ingredients and other  
33 intervention features for positively changing outcomes was assessed by calculating promise  
34 ratios.[25]  
35  
36  
37  
38  
39  
40  
41  
42

### 43 **Patient and Public Involvement**

44  
45 There was no patient or public involvement in this study.  
46  
47  
48  
49  
50  
51  
52  
53  
54  
55  
56  
57  
58  
59  
60

## RESULTS

In total 52,074 (database searching n=51,965, reference lists and citation/hand searching n=109) potentially relevant studies were identified from the electronic search (Figure 1). A total of 297 full text articles (database search = 288 and citation/hand searching = 9) were assessed for inclusion. Seventeen studies reporting on 13 interventions met the inclusion criteria.[26-42] An additional 15 sources of grey literature were consulted for details on the intervention development, person centredness, fidelity, and BCTs.[43-57]

Findings of the Art Lift intervention were reported across four studies.[26-29] The Art Shine intervention was reported in one study.[30] The Social Cure and social prescribing intervention was reported across two studies.[38, 39] The British Red Cross Connecting Communities,[31] The Cadwun Mon,[32] The Cares of Life Project,[33] The Fife Social Prescribing: Mood Café,[34] GROW: Art, Park, and Wellbeing,[35] Luton Social Prescribing Programme,[36] Museums on Prescription,[37] The Southwest Wellbeing Programme,[40] and Wetlands for Wellbeing[42] all were reported within one study. One included study[41] did not provide a specific name for the intervention.

**[Insert Figure 1 around here, Title: PRISMA Diagram]**

### Study Characteristics

A summary of the 13 interventions reported across the 17 included studies is presented in Table 1. Fifteen studies were conducted in England,[26-31, 33, 35-42] one in Wales[32] and one in Scotland.[34] The 17 studies had a combined post-intervention sample size of 5,036 participants. Fifteen studies were uncontrolled before and after designs,[26-32, 34-40, 42] one a randomised controlled trial,[33] and one a matched groups design.[41]

The referral pathways were mapped against those described by Husk et al.[8] The most common referral pathway reported within studies was the link worker model (n=12

1  
2  
3 studies),[26-29, 31, 32, 34, 36, 38, 39, 41, 42] followed by referrals direct from community  
4 services (n=3 studies),[35, 37, 40] primary care,[30] or from multiple services.[33]  
5  
6  
7  
8

9 The mean age of participants who received social prescribing interventions ranged from 43 to  
10 77 years across 11 studies.[26-34, 38, 39] Six studies did not report on the age of  
11 participants.[35-37, 40-42] Two studies did not report data on the sex of participants.[33, 41]  
12  
13 Out of 15 studies that reported on participant sex, 12 studies reported a higher proportion of  
14 female participants.[26-32, 34, 36-38, 40]  
15  
16  
17  
18  
19  
20  
21

22 Data on ethnicity of participants was reported in seven studies,[30, 31, 33, 37, 40-42] but most  
23 did not report data using census categories; for example, only reporting numbers of  
24 participants who were White British or from Black, Asian, and Minority Ethnic (BAME) groups.  
25 Only one study specifically targeted people from BAME groups.[33] One study did not report  
26 on participant ethnicity at the post-assessment period.[41] Proportions of White or White  
27 British participants at post-assessment based on data from five studies was 58%, [31] 66%, [30]  
28 82%, [37, 42] and 91%. [40]  
29  
30  
31  
32  
33  
34  
35  
36  
37  
38

39 Employment status was reported by five studies [28, 29, 36, 30, 42] and was summarised into  
40 four categories: participants who were in work (either full time or part time), education (full time  
41 or part time education or described as a student), or position of responsibility (such as full time  
42 carers)(ranged from 1 to 259 participants); those who were not unemployed or incapacitated  
43 from work (ranged from 10 to 198 participants based on data from five studies); participants  
44 who were retired (ranged from 5 to 209 participants based on data from two studies); and  
45 participants described as 'other'(ranged from 2 to 21 participants based on data from two  
46 studies). Employment status was not reported by the remaining 12 studies.[26, 27, 30-35, 37-  
47 39, 41]  
48  
49  
50  
51  
52  
53  
54  
55  
56  
57  
58  
59  
60

1  
2  
3 The most commonly reported reasons for referral to a social prescribing service were anxiety  
4 or depression, (or combined anxiety and depression), n=9 studies.[26-29, 33, 35, 40-42]  
5  
6 Depression and social isolation was the primary reason for referral in one study.[30]  
7  
8 Loneliness was the primary reason for referral in one study,[31] and social isolation in  
9  
10 another.[37] Social isolation and loneliness was reported as the primary reasons for referral  
11  
12 by three studies.[32, 38, 39] The two remaining studies reporting mild to moderate mental  
13  
14 health issues[36] and mental wellbeing[35] as primary reasons for referral.  
15  
16  
17  
18  
19

20 The period between baseline assessment and follow up was reported by 15 studies and  
21  
22 ranged between 1.5 months[40] to 9 months.[39] One study did not report a follow-up  
23  
24 period.[34] One study reported a follow up period that was based on individual need.[36]  
25  
26 Fourteen studies reported sample sizes at pre-assessment, which ranged from n=16[42] to  
27  
28 n=841.[40] All 17 included studies reported the total number of individuals who took part in a  
29  
30 follow up assessment, ranging from 16[42] to 2,250.[31] Based on data from 14 studies,[26-  
31  
32 29, 32-35, 36, 38-42] the average loss to follow up (attrition rate) was 38% (SD=27), which  
33  
34 ranged from 90%[39] to 0%.[35, 42]  
35  
36  
37  
38  
39  
40  
41  
42  
43  
44  
45  
46  
47  
48  
49  
50  
51  
52  
53  
54  
55  
56  
57  
58  
59  
60

Table 1. Summary of Study Characteristics

| Author(s) of Corresponding Study(s) | Intervention / Programme name             | Research Design                 | Population Sample Sizes (pre-post assessment data and mean age and sex)                            | Participant Ethnicity^ (post-assessment data)                                     | Employment Status (post-assessment data)              | Reason for Referral             | Duration of Follow-up | Referral Pathway (Husk et al)[8]                 |
|-------------------------------------|-------------------------------------------|---------------------------------|----------------------------------------------------------------------------------------------------|-----------------------------------------------------------------------------------|-------------------------------------------------------|---------------------------------|-----------------------|--------------------------------------------------|
| Crone, et al. 2013[26]              | Art Lift                                  | Uncontrolled Before/After Study | Pre-assessment n=157<br>Post-assessment n=84 (Mean age=57, SD=15), Male n=22, Female n=62          | NR                                                                                | NR                                                    | Anxiety and Depression          | 2.5 months            | Direct Referral from Link Worker in Primary Care |
| Crone, et al. 2018[27]              |                                           | Uncontrolled Before/After Study | Pre-assessment n=818<br>Post-assessment n=651 (Mean age=51.9, SD=15.9), Male n=142**, Female n=509 | NR                                                                                | NR                                                    | Anxiety and Depression          | 2.5 months            | Direct Referral from Link Worker in Primary Care |
| Sumner, et al. 2019[28]             |                                           | Uncontrolled Before/After Study | Pre-assessment n=547<br>Post-assessment n=418 (Mean age=49.7, SD=15.5), Male n=83**, Female n=335  | NR                                                                                | In+ n=76<br>Out** n=176<br>Retired n=103              | Anxiety and Depression          | 2.5 months            | Direct Referral from Link Worker in Primary Care |
| Sumner, et al. 2021[29]             |                                           | Uncontrolled Before/After Study | Pre-assessment n=245<br>Post-assessment n=110 (Mean age=51.3, SD=15.9), Male n=16**, Female n=94   | NR                                                                                | In+ n=22<br>Out** n=86<br>Retired n=NR<br>Unknown n=2 | Anxiety and Depression          | 2 months              | Direct Referral from Link Worker in Primary Care |
| van de Venter et al. 2014[30]       | Art Shine                                 | Uncontrolled Before/After Study | Pre-assessment n=NR<br>Post-assessment n=44 (Mean age=43, SD=NR), Male n=7, Female n=36, Other n=1 | 'White-British' n=29 (66%)<br>'Black and Minority Ethnic' n=9(21%)<br>Unknown n=6 | NR                                                    | Depression and Social Isolation | 5 months              | Direct Referral from Primary Care                |
| Foster, et al. 2021[31]             | British Red Cross: Connecting Communities | Uncontrolled Before/After Study | Pre-assessment n=NR<br>Post-assessment n=2,250 (Mean age=65.6, SD=18.8), Male n=702,               | 'White British' n= 1,313 (58%)<br>'Not White British' n=499(22%)<br>Unknown n=438 | NR                                                    | Loneliness                      | 3 months              | Link Worker Model                                |

|                                  |                                     |                                 |                                                                                                                                                                                                                                                                        |                                                                                |                       |                                       |                               |                                                                 |
|----------------------------------|-------------------------------------|---------------------------------|------------------------------------------------------------------------------------------------------------------------------------------------------------------------------------------------------------------------------------------------------------------------|--------------------------------------------------------------------------------|-----------------------|---------------------------------------|-------------------------------|-----------------------------------------------------------------|
|                                  |                                     |                                 | Female n=1,426, Other n=122                                                                                                                                                                                                                                            |                                                                                |                       |                                       |                               |                                                                 |
| <b>Roberts, et al. 2020[32]</b>  | Cadwyn Mon                          | Uncontrolled Before/After Study | Pre-assessment n=182<br>Post-assessment n=120<br>(Mean age=76.7, SD=NR), Male n=22, Female n=98, Other n=1                                                                                                                                                             | NR                                                                             | NR                    | Loneliness and Social Isolation       | 3.75 Months                   | Link Worker Model                                               |
| <b>Afuwape, et al. 2010[33]</b>  | Cares of Life Project               | Randomised Controlled Trial     | N=16 <i>Intervention Group</i><br>Pre-assessment n=20<br>Post-assessment n=16<br>(Mean age =43.6, SD=7.7) Male n=NR, Female n=NR<br><br>N=16 <i>Comparison group</i><br>Pre-assessment n=20<br>Post-assessment n=16<br>(Mean age=32.6, SD=11.0) Male n=NR, Female n=NR | 'All participants were of Black African Origin or Black Caribbean Origin' n=32 | NR                    | Anxiety and Depression                | 3 Months                      | Direct referral from multiple Sectors*                          |
| <b>Morton, et al. 2015[34]</b>   | Fife Social Prescribing (Mood Café) | Uncontrolled Before/After Study | Pre-assessment n=174<br>Post-assessment n=136<br>(Mean age=52, SD=11), Male n=37, Female n=99**                                                                                                                                                                        | NR                                                                             | NR                    | Anxiety and Depression                | NR                            | Link Worker Model                                               |
| <b>Thomson, et al. 2020[35]</b>  | GROW: Art, Park and Wellbeing       | Uncontrolled Before/After Study | Pre-assessment n=20<br>Post-assessment n=20<br>(Mean age=NR), Male n=11, Female n=9**                                                                                                                                                                                  | NR                                                                             | NR                    | Mental Wellbeing                      | 2.5 Months                    | Direct referral from Community and Local Mental Health Services |
| <b>Pescheny, et al. 2019[36]</b> | Luton Social Prescribing Programme  | Uncontrolled Before/After Study | Pre-assessment n=162<br>Post-assessment n=63<br>(Mean age=NR), Male n=23, Female n=40                                                                                                                                                                                  | NR                                                                             | In+ n=22<br>Out+ n=41 | Mild to moderate mental health issues | Dependant on Needs Assessment | Link Worker Model                                               |

1  
2  
3  
4  
5  
6  
7  
8  
9  
10  
11  
12  
13  
14  
15  
16  
17  
18  
19  
20  
21  
22  
23  
24  
25  
26  
27  
28  
29  
30  
31  
32  
33  
34  
35  
36  
37  
38  
39  
40  
41  
42  
43  
44  
45  
46

|                                  |                                    |                                 |                                                                                                                                                                                                                                                                                                                                                               |                                                                                                                                                                                                                                   |                                                         |                                 |            |                                     |
|----------------------------------|------------------------------------|---------------------------------|---------------------------------------------------------------------------------------------------------------------------------------------------------------------------------------------------------------------------------------------------------------------------------------------------------------------------------------------------------------|-----------------------------------------------------------------------------------------------------------------------------------------------------------------------------------------------------------------------------------|---------------------------------------------------------|---------------------------------|------------|-------------------------------------|
| <b>Thomson, et al. 2018[37]</b>  | Museums on Prescription            | Uncontrolled Before/After Study | Pre-assessment n=NR<br>Post-assessment n=115 (Mean age=NR), Male n=42**, Female n=73                                                                                                                                                                                                                                                                          | 'White-British' n=94 (82%)<br>Other=NR                                                                                                                                                                                            | NR                                                      | Social Isolation                | 2.5 Months | Direct Referral from Community Care |
| <b>Kellezi, et al. 2019[38]</b>  | Social Cure and Social Prescribing | Uncontrolled Before/After Study | Pre-assessment n=630<br>Post-assessment n=178 (Mean age=55.8, SD=13.8), Male=86, Female=91, Other n=1                                                                                                                                                                                                                                                         | NR                                                                                                                                                                                                                                | NR                                                      | Loneliness                      | 4 Months   | Link Worker Model                   |
| <b>Wakefield, et al 2022[39]</b> |                                    | Uncontrolled Before/After Study | Pre-assessment n=630<br>Post-assessment n=63 (Mean age=57.1, SD=15.7), Male=32, Female=31                                                                                                                                                                                                                                                                     | NR                                                                                                                                                                                                                                | NR                                                      | Social Isolation and Loneliness | 9 Months   | Link Worker Model                   |
| <b>Jones, et al. 2013[40]</b>    | Southwest Wellbeing Programme      | Uncontrolled Before/After Study | Pre-assessment n=841<br>Post-assessment n=687 (Mean age=NR), Male n=179, Female n=357, Other n=151                                                                                                                                                                                                                                                            | 'White' n=623 (91%)<br>'Black or Minority Ethnic Group' n=38 (6%)<br>Unknown n=26                                                                                                                                                 | In+ n=259<br>Out** n=198<br>Retired n=209<br>Other n=21 | Anxiety and Depression          | 3 Months   | Direct Referral from Community Care |
| <b>Carnes, et al. 2017[41]</b>   | Unnamed Intervention               | Matched Groups Design           | Survey Study<br><i>Intervention Group</i><br>Pre-assessment, n=184<br>Post-assessment, n=65 (Mean age=NR)<br>Male= NR, Female= NR<br><br><i>Comparison Group (matched based on age, GP attendance and diagnosis)</i><br>Pre-assessment, n= 302<br>Post-assessment, n=127<br>Mean age = NR<br>Male= NR, Female= NR<br><br>Analysis of Health Care Resource use | Survey Study<br><i>Intervention Group</i><br><br>Post-assessment = NR<br><br><i>Comparison Group</i><br>Pre-assessment: White n=170<br>Non-white n=123<br><br>Post-assessment = NR<br><br>Analysis of Health Care Resource use=NR | NR                                                      | Anxiety and Depression          | 8 Months   | Link Worker Model                   |

|                               |                        |                                 |                                                                                                                                                                                                                                                |                                                      |                                      |                        |            |                                           |
|-------------------------------|------------------------|---------------------------------|------------------------------------------------------------------------------------------------------------------------------------------------------------------------------------------------------------------------------------------------|------------------------------------------------------|--------------------------------------|------------------------|------------|-------------------------------------------|
|                               |                        |                                 | <p><i>Intervention Group,</i><br/>n=377<br/>(Mean age=NR)<br/>Male= NR, Female= NR</p> <p><i>Comparison Group</i><br/>(<i>matched based on age, sex, ethnicity and comorbidities</i>), n= 7,540<br/>Mean age = NR<br/>Male= NR, Female= NR</p> |                                                      |                                      |                        |            |                                           |
| <b>Maund, et al. 2019[42]</b> | Wetlands for Wellbeing | Uncontrolled Before/After Study | Pre-assessment n=16<br>Post-assessment n=16<br>(Mean age=NR),<br>Male=8, Female=8                                                                                                                                                              | 'White-British' n=13 (82%)<br>'White-Other' n=3(19%) | In+ n=1<br>Out** n=10<br>Retired n=5 | Anxiety and Depression | 1.5 Months | Link worker model from community referral |

^Terminology used by authors.

\* Multiple Sector – Referral from a combination of the following: General Practitioner, Health Care Professional, Community, Self-referral, Secondary Care or Social Care.

\*\* Not explicitly reported, calculated by authors

+ In = in work, education, or position of responsibility

++ Out = out of work, education, or position of responsibility

NR- Not reported



## Study Outcomes

Outcomes are grouped into between-group and within-group differences (Table 2). Of the 17 included studies, 16 reported statistically significant improvements in mental health, mental well-being, general health, or quality of life outcomes from baseline to follow-up[26-32, 34-40, 42] or between the intervention group and matched controls.[33] Only one intervention (unnamed intervention)[41] did not report any statistically significant improvement in outcomes.

The 7 or 14-item Warwick-Edinburgh Mental Wellbeing Scale (WEMWBS)[58] was the most frequently used outcome measure.[26-30, 34, 36, 40, 42] Seven studies used the 14-item[26-30, 34, 42] and three used the 7-item short-form version.[26, 36, 40] All studies reported a statistically significant improvement in mental well-being assessed with the WEMWBS.

Three studies utilised other measures of mental wellbeing: Social Wellbeing Questionnaire (SWB-6);[40] Museum Wellbeing Measure for Older Adults (MWM-OA);[37] and University College London Museum Wellbeing Measure.[35] All three studies reported a statistically significant improvement in mental wellbeing.

Three studies[31, 38, 39] assessed loneliness using the University College London Loneliness Scale (ULS-3 or 8)[59] and one[32] used the De Jon Gierveld Loneliness Scale.[60] All three studies reported a statistically significant reduction in loneliness. One study[32] reported a statistically significant reduction in social isolation assessed with the Lubben Social Network Scale (LSNL).[61]

Five studies[29, 34, 40-42] utilised mental health symptom-based outcome measures such as: Hospital Anxiety and Depression Scale (HADS),[62] Generalised Anxiety Disorder Assessment (GAD-7),[63] Patient Health Questionnaire (PHQ-8),[64] or the Centre for

Epidemiological Studies Depression Scale (CES-D-7).[65] Four studies reported a statistically significant improvement in symptom-based outcomes.[29, 34, 40, 42]

General health measures were reported by three studies:[33, 40, 41] General Health Questionnaire-28 (GHQ-28)[66] or Global Assessment of Functioning (GAF).[67] In addition, quality of life measures were used by three studies[32, 33, 39] using the Satisfaction with Life Scale,[68] EuroQol Quality of Life Measure (EQ5D),[69] and the Short-Form-36 (SF-36).[70]

Other outcomes assessed by one study[42] were stress using the Perceived Stress Scale (PSS)[71] and mood using the Positive and Negative Affect Schedule (PANAS),[72] and reported statistically significant improvements in these outcomes following social prescribing.

Two studies[38, 41] reported on health service utilisation using patient reported data on group memberships and primary care health service use[38] and health records to extract data on consultation rates and medication prescribed.[41] Both studies reported a statistically significant reduction in use of primary health care.

**Table 2: Between and Within Group Changes in Outcomes**

| Intervention/<br>Programme<br>Name                             | Study                       | Outcome Measure              | Statistically<br>significant<br>improvement (p-<br>value) | 95%<br>Confidence<br>Intervals |
|----------------------------------------------------------------|-----------------------------|------------------------------|-----------------------------------------------------------|--------------------------------|
| <b>Between Group Changes (compared with comparison groups)</b> |                             |                              |                                                           |                                |
| Cares Of Life<br>Project                                       | Afuwape, et al.<br>2010[33] | GHQ-28                       | Yes (p=0.03)                                              | 0.86 to 14.65                  |
|                                                                |                             | GAF                          | No (p=0.87)                                               | -10.40 to 8.84                 |
|                                                                |                             | SF-36 Mental Health<br>Score | Yes (p=0.02)                                              | -21.99 to -<br>1.88            |
| Unnamed<br>Intervention                                        | Carnes, et al.<br>2017[41]  | General Health Score         | No                                                        | -0.31 to 0.25                  |
|                                                                |                             | HADS Score                   | No                                                        | -2.11 to 2.58                  |
|                                                                |                             | Wellbeing                    | No                                                        | -0.57 to 0.39                  |
| <b>Within Group Changes</b>                                    |                             |                              |                                                           |                                |
| Art Lift                                                       | Crone, et al.<br>2013[26]   | WEMWBS-7                     | Yes (p<0.001)                                             | Not Reported                   |
|                                                                |                             | WEMWBS -14                   | Yes (p<0.001)                                             | Not Reported                   |
|                                                                | Crone, et al.<br>2018[27]   | WEMWBS-14                    | Yes (p<0.001)                                             | Not Reported                   |
|                                                                | Sumner, et al.<br>2019[28]  | WEMWBS-14                    | Yes (p<0.001)                                             | 0.93 to 0.98                   |
|                                                                | Sumner, et al.              | GAD-7                        | Yes (p<0.001)                                             | Not Reported                   |

|                                     |                                |                                   |                |                |
|-------------------------------------|--------------------------------|-----------------------------------|----------------|----------------|
|                                     | 2021[29]                       | PHQ-8                             | Yes (p<0.001)  | Not Reported   |
|                                     |                                | WEMWEBS-14                        | Yes (p<0.001)  | Not Reported   |
| Art Shine                           | van de Venter, et al. 2014[30] | WEMWBS-14                         | Yes (p<0.001)  | 4.80 to 11.20  |
| BRC Connecting Communities          | Foster, et al. 2021[31]        | ULS-3                             | Yes (p<0.001)  | -1.91 to -1.77 |
| Cadwyn Mon                          | Roberts, et al. 2020[32]       | De Jong Gierveld Loneliness Scale | Yes (p<0.001)  | Not Reported   |
|                                     |                                | Lubben Social Network Scale       | Yes (p<0.004)  | Not Reported   |
|                                     |                                | Satisfaction with Life Scale      | Yes (p<0.001)  | Not Reported   |
| Fife Social Prescribing (Mood Café) | Morton, et al. 2015[34]        | HADS – Anxiety                    | Yes (p<0.001)  | 2.20 to 3.30   |
|                                     |                                | HADS – Depression                 | Yes (p<0.001)  | 1.90 to 3.20   |
|                                     |                                | WEMWBS-14                         | Yes (p<0.001)  | -8.10 to -5.10 |
| GROW: Art, Park and Wellbeing       | Thomson, et al. 2020[35]       | UCL Museum Wellbeing Measure      | Yes (p<0.001)  | Not Reported   |
| Luton Social Prescribing Programme  | Pescheny, et al. 2019[36]      | WEMWBS-7                          | Yes (p<0.0001) | 1.68 to 3.88   |
| Museums On Prescription             | Thomson, et al. 2018[37]       | MWM-OA Main Effect                | Yes (p<0.001)  | Not Reported   |
| Social Cure and Social Prescribing  | Kellezi, et al. 2019[38]       | ULS-8                             | Yes (p<0.0001) | Not Reported   |
|                                     | Wakefield, et al. 2022[39]     | ULS-8                             | Yes (p<0.001)  | Not Reported   |
|                                     |                                | EQ5D                              | Yes (p<0.04)   | Not Reported   |
| Southwest Wellbeing Programme       | Jones, et al. 2013[40]         | General Health Scale*             | Yes (p<0.001)  | Not Reported   |
|                                     |                                | Social Wellbeing: SWB-6*          | Yes (p<0.001)  | Not Reported   |
|                                     |                                | WEMWBS-7*                         | Yes (p<0.001)  | Not Reported   |
|                                     |                                | CES-D-7**                         | Yes (p<0.001)  | Not Reported   |
| Wetlands For Wellbeing              | Maund, et al. 2019[42]         | WEMWBS-14                         | Yes (p=0.009)  | Not Reported   |
|                                     |                                | GAD-7                             | Yes (p=0.002)  | Not Reported   |
|                                     |                                | PSS                               | Yes (p=0.041)  | Not Reported   |
|                                     |                                | PANAS (Positive)                  | Yes (p=0.012)  | Not Reported   |
|                                     |                                | PANAS (Negative)                  | Yes (p=0.025)  | Not Reported   |

\*Components of the Southwest Well Being Questionnaire

Generalised Anxiety Disorder (GAD-7), Global Assessment of Functioning (GAF), General Health Questionnaire-28 (GHQ-28), General Health Score (GHS), Hospital Anxiety and Depression Scale (HADS), Museum Wellbeing Measure for Older Adults (MWM-OA), Perceived Stress Scale (PSS) Positive and Negative Affect Schedule (PANAS), University College London Loneliness Scale (ULS-3 or 8), Short Form-36 (SF-36), Southwest Well-being Questionnaire (SWWBQ), Warwick- Edinburgh Mental Wellbeing Scale (WEMWBS), Patient Health Questionnaire (PHQ-8), EuroQol Quality of Life Measure (EQ5D), Centre for Epidemiology Depression Scale (CES-D-7).

## Methodological Quality Assessment

The methodological quality assessment of for each individual study can be found in Supplementary material 3.

With reference to the 15 uncontrolled before and after studies, the scores (out of 22) ranged from 9[26, 39] to 14.[30, 36, 37, 42] All before/after studies clearly stated the study question or objective and included participants that were representative of those who would be eligible

1  
2  
3 in the clinical population of interest. Seven studies clearly described the eligibility criteria or  
4 described the intervention in sufficient enough detail to ensure the consistent delivery across  
5 the included population.[28, 30, 32, 36, 37, 40, 42] Only one study detailed sufficient  
6 information to conclude that all eligible participants were enrolled[26] and one study used a  
7 sample size that was adequate to provide confidence in the findings (evidence that the sample  
8 size achieved was consistent with a statistical power analysis.[38] None of the studies  
9 measured outcomes at specified intervals across the study. All but two studies[26, 38] used  
10 outcome measures that had been assessed for reliability and validity. All but two studies[26,  
11 27] utilised inferential statistical methods to examine changes in outcomes. There were  
12 substantial losses to follow up of greater than 20% reported in 11 studies.[26-29, 31, 32, 34,  
13 36, 38-40] For four studies there was insufficient data to calculate a percentage loss to follow-  
14 up.[30, 35, 37, 42]

15  
16  
17  
18  
19  
20  
21  
22  
23  
24  
25  
26  
27  
28  
29  
30  
31  
32  
33  
34  
35  
36  
37  
38  
39  
40  
41  
42  
43  
44  
45  
46  
47  
48  
49  
50  
51  
52  
53  
54  
55  
56  
57  
58  
59  
60  
The randomised controlled trial[33] scored 20 out of a maximum of 22 points. A potential  
source for bias was performance and ascertainment as the allocation to groups was not  
concealed from the interventionists, although in the context of social prescribing interventions  
this is difficult to achieve.

The matched groups design study[41] was found overall to have a moderate level of bias. The  
bias due to confounding pre-intervention and selection of participants into the study was  
judged as being moderate and low respectively. Bias in classification of interventions was also  
judged to be low. Bias due to missing, measurement of outcomes and selection of the report  
results were all judged to be moderate.

### **Fidelity Assessment**

A summary table presenting the treatment fidelity assessment of the included interventions  
and sources of information used is presented in supplementary material 4.

### *Design of the study*

All 13 intervention's provided sufficient information to establish use of treatment fidelity strategies for intervention design to ensure the same dose of the intervention had been delivered within conditions.[26-42] None of the intervention's reported any explicit evidence that they had planned for implementation setbacks (e.g. sufficient numbers of link workers being recruited to meet future demand).

### *Monitoring and improving provider training*

Seven interventions (Art Shine,[30] Cadwyn Mon,[31] Cares of Life Project,[33] Fife Social Prescribing Mood Café,[34] Southwest Wellbeing Programme,[40] Unnamed Intervention,[41] and Wetlands for Wellbeing[42] provided evidence that they provided standardised training for providers (i.e., training was developed specifically for the purpose of intervention delivery). Two interventions (Art Shine[30] and Southwest Wellbeing Programme)[40] accommodated and tailored training to address provider differences in delivery (i.e., rotations or specific role placement) and targeted acquisition of skills by providers (e.g., follow up sessions with service/ research leads). One intervention (Art Shine)[30] minimised drift in provider skills over time by monitoring and reviewing delivery on a monthly basis.

### *Monitoring and improving delivery of interventions*

Four interventions (Art Lift,[26-29] Art Shine,[30] Cadwyn Mon,[32] GROW: Art. Park and Wellbeing)[35] provided sufficient information to suggest they controlled for provider differences by using strategies such as rotating sessions attended or offering a range of activities. One intervention (GROW: Art. Park and Wellbeing)[35] explicitly reported monitoring adherence to a protocol. One intervention (Art Shine)[30] explicitly reported strategies to reduce differences within interventions.

### *Monitoring and improving receipt of interventions and enactment of intervention skills*

1  
2  
3 All 13 interventions reported information regarding service users' comprehension of the  
4 intervention. Due to the nature of social prescribing interventions being tailored to the  
5 individual and their specific needs, the specific skills that would be targeted by the  
6 interventions is difficult to assess. Similarly, and further due to the absence of long- term  
7 follow-up assessments after the intervention period, this prohibited a robust assessment of  
8 enactment of intervention skills after the intervention activity had ended.  
9  
10  
11  
12  
13  
14  
15  
16  
17

### 18 **Person-Centredness**

19  
20 A summary table of the assessment of person-centredness of the 13 interventions is  
21 presented in supplementary material 5.  
22  
23  
24  
25

26 Eight interventions (BRC Connecting Communities,[31] Cadwyn Mon,[32] Cares of Life  
27 Project,[33] GROW: Art, Park and Wellbeing,[35] Luton Social Prescribing Programme,[36]  
28 Social Cure and Social Prescribing,[38, 39] Southwest Wellbeing Programme,[40] and  
29 unnamed intervention)[41] provided evidence that a personal needs assessment with service  
30 users was undertaken to discuss their needs and goals. Six interventions (Art Lift,[26-29]  
31 Cadwyn Mon,[32] Cares of Life Project,[33] Fife Social Prescribing: Mood Café,[34] GROW:  
32 Art, Park and Wellbeing,[35] Luton Social Prescribing Programme,[36] Southwest Wellbeing  
33 Programme)[40] explicitly stated that service users were offered a choice of social prescribing  
34 interventions. Three interventions (Luton Social Prescribing Programme,[36] Southwest  
35 Wellbeing Programme,[40] and Wetlands for Wellbeing)[42] provided explicit evidence that  
36 service users were actively involved in discussions to elicit their preferences/values on the  
37 available social prescribing options. None of the included interventions provided any explicit  
38 evidence they ensured service users received a social prescription that was consistent with  
39 their preferences.  
40  
41  
42  
43  
44  
45  
46  
47  
48  
49  
50  
51  
52  
53  
54  
55  
56  
57

58 Overall, three interventions (Art Shine,[30] Museums on Prescription,[37] and Wetlands for  
59 Wellbeing)[42] did not report any explicit evidence that any core components of person-  
60

1  
2  
3 centred care were adopted. None of the 13 interventions provided any explicit evidence for all  
4  
5 four components of person-centred care.  
6  
7  
8

### 9 **Intervention Development Processes**

10  
11 A summary table of the intervention development processes is presented in supplementary  
12  
13 material 6.  
14  
15  
16

17  
18 Eight interventions (Art Lift,[26-29] BRC Connecting Communities,[31] Cadwyn Mon,[32]  
19  
20 Cares of Life Project,[33] Fife Social Prescribing: Mood Café,[34] GROW: Art, Park and  
21  
22 Wellbeing,[35] Museums on Prescription,[37] and Southwest Wellbeing Programme)[40]  
23  
24 provided explicit evidence they had used the best available evidence in the development  
25  
26 (e.g. systematic reviews, previous research, previous piloting). Eight interventions (Art  
27  
28 Lift,[26-29] BRC Connecting Communities,[31] Cadwyn Mon,[32] Cares of Life Project,[33]  
29  
30 Fife Social Prescribing: Mood Café,[34] Luton Social Prescribing Programme,[36] Southwest  
31  
32 Wellbeing Programme,[40] and Unnamed Intervention)[41] explicitly referred to conducting a  
33  
34 population needs assessment to inform intervention development. Four interventions (Art  
35  
36 Lift,[26-29] Art Shine,[30] Fife Social Prescribing: Mood Café,[34] and Luton Social  
37  
38 Prescribing Programme)[36] provided explicit evidence of usability testing or feasibility  
39  
40 testing/piloting of the intervention; however one interventions explicitly reported they were in  
41  
42 the pilot stage (Unnamed Intervention).[41]  
43  
44  
45  
46  
47

48  
49 Two interventions provided explicit evidence for the use of a framework to underpin  
50  
51 development and evaluation. Cares of Life[33] used the Medical Research Council Framework  
52  
53 for The Development and Evaluation of Complex Interventions.[73] The Social Cure and  
54  
55 Social Prescribing[38, 39] used the Social Cure Framework.[74] None of the 13 included  
56  
57 interventions provided evidence of the use a theory or model of behaviour change to underpin  
58  
59 the development of the intervention. Two interventions (Fife Social Prescribing: Mood Café[34]  
60

1  
2  
3 and Southwest Wellbeing Programme)[40] provided evidence of the use of a co-  
4 design/production process, working with service users in the co-design of interventions.  
5  
6  
7

### 8 9 **Behaviour Change Techniques**

10  
11 A total of 22 different BCTs (Figure 2) were reported across the 13 interventions. The most  
12 frequently coded BCT was social support-unspecified (e.g. social support from link workers,  
13 friends or relatives)(n=11), followed by credible source (e.g. health care professional)(n=7),  
14 social support-practical (e.g. advise on, arrange, or provide practical help)(n=6) and social  
15 support-emotional (e.g. providing support with feelings and emotions)(n=5).  
16  
17  
18  
19  
20  
21  
22  
23

24 **[Insert Figure 2 around here. Title: Frequency of Individual BCT's Used Across Included**  
25 **Interventions]**  
26

27  
28  
29 Individual BCTs were categorised into 10 groupings (Figure 3) in accordance with the  
30 published taxonomy.[16] The most common groupings were social support (n=11);  
31 comparison of outcomes (n=7), goals and planning; feedback and monitoring; and natural  
32 consequences (all n=6).  
33  
34  
35  
36  
37  
38  
39

40 **[Insert Figure 3 around here. Title: Frequency of BCT Groupings Across the Included**  
41 **Interventions]**  
42

43  
44  
45 A promise ratio analysis was planned for the coded BCTs and other intervention features;  
46 however, this was not feasible due to the preponderance of positive outcomes (17 of the 18  
47 studies all reported statistically significant improvements in outcomes).  
48  
49  
50  
51  
52  
53  
54  
55  
56  
57  
58  
59  
60



## DISCUSSION

### Summary of findings

This systematic review identified 13 UK-based social prescribing interventions reported across 17 studies, which most-commonly utilised a link worker model or direct referral from community services, for predominately working-age adults living with common mental health conditions (anxiety and depression). All but one study reported a statistically significant improvement in outcomes (mental wellbeing, mental health, loneliness, and/or general health/quality of life outcomes). Consistent with previous research,[75-77] two studies[38, 41] in the current review reported reductions in primary healthcare use (consultation rates and medication prescribed).—However, these findings should be interpreted with caution. Consistent with previous reviews of social prescribing interventions,[4, 8, 9, 75] the majority (15 out of 17) of the included studies were uncontrolled before and after studies (with a range of methodological shortcomings). Attrition rates were generally high (mean of 38%) and there was substantial variability in outcome measures. Furthermore, there was a lack of long-term follow-up studies.

Person centredness is one of the key pillars of social prescribing for empowering the person to improve their own health.[78] None of the included interventions in this review reported evidence of adhering to all four core principles of person-centred care.

Ethnicity of participants was under-reported across the studies in the current review. Based on five studies the proportions of White or White British participants ranged from 58%[31] to 91%.[40] The current Consensus data reports the UK population to be 86% White, 8% Asian, 3% Black and 2% Mixed/Multiple Ethnic Groups.[79]

Only two interventions reported using a specific framework for design and evaluation of social prescribing interventions - the Medical Research Council Framework For The Development And Evaluation Of Complex Interventions[73] and the Social Cure Framework.[74] There was

1  
2  
3 a lack of explicit evidence of service user involvement in co-design activity and usability or  
4 feasibility testing of interventions. This could lead to sub-optimal acceptability and  
5 engagement with social prescribing interventions.  
6  
7  
8  
9

10  
11 Treatment fidelity strategies are critically important for external validity of interventions.  
12 Evidence from this review indicated several shortcomings in this regard. However, due to the  
13 nature of social prescribing interventions (i.e., highly tailored to individuals and their  
14 circumstances) the findings of the fidelity assessment should be interpreted with caution.  
15  
16 There is no published guidance for assessing fidelity of social prescribing interventions. For  
17 example, it is not clear what cognitive and behavioural skills social prescribing interventions  
18 are targeting and how these can be assessed in terms of receipt and enactment by  
19 participants.  
20  
21  
22  
23  
24  
25  
26  
27  
28  
29

30 The most common BCT groupings identified were: social support (BCTs – social support-  
31 unspecified/ practical/ emotional); comparison of outcomes (BCTs - credible source); goals  
32 and planning (BCTs - goal setting (behaviour), problem solving, goal setting (outcome), and  
33 action planning); feedback and monitoring (BCTs – feedback on behaviour, self-monitoring of  
34 behaviour, monitoring of behaviour by others without feedback, feedback on outcome of  
35 behaviour); and natural consequences (BCTs – information about health consequences,  
36 information about social and environmental consequences, information about emotional  
37 consequences). The importance of identifying and reporting on BCTs used when  
38 developing/delivering interventions is important to further understanding and to facilitate  
39 replicability.[80-82]  
40  
41  
42  
43  
44  
45  
46  
47  
48  
49  
50

51  
52  
53 Given the lack of detail provided by the studies of social prescribing interventions in the review,  
54 and that 16 out of 17 studies reported statistically significant improvements in outcomes, we  
55 were unable to conduct promise calculations (summing promising interventions (reported  
56 positive results) that includes a specific active ingredient of interest, for example different  
57  
58  
59  
60

1  
2  
3 models of social prescribing, and dividing this by the number of non-promising interventions  
4 (reporting negative results or no change) featuring the same active ingredient) to explore  
5 further the active ingredients of effective social prescribing interventions.  
6  
7  
8  
9

## 10 11 **Limitations**

12  
13 Several limitations of this review need to be acknowledged. There continues to be a debate  
14 about what constitutes a social prescribing intervention, and this will be reflected in published  
15 literature. Therefore, the existence of additional studies that would have met our inclusion  
16 criteria cannot be ruled out. Findings of the review are also limited by the descriptions of  
17 interventions reported within the included studies (i.e., most social prescribing  
18 pathways/interventions were not described in detail), which impacts on conclusions about  
19 intervention development processes, person centredness, treatment fidelity and BCTs.  
20 Improved quality of reporting on social prescribing models and interventions with reference to  
21 a published BCT taxonomy[16] would help address this issue.  
22  
23  
24  
25  
26  
27  
28  
29  
30  
31  
32  
33  
34

## 35 **Future Research**

36  
37 It is critical that complex interventions are underpinned by a structured development process  
38 involving service users and providers in a co-design activity with reference to appropriate  
39 evidence and theory. Future research should prioritise the application of theory to the design  
40 and evaluation of interventions to help identify the optimal theoretical approach to underpin  
41 social prescribing interventions for specific outcomes.  
42  
43  
44  
45  
46  
47  
48

49  
50 Future research on social prescribing interventions for mental health (and more broadly) would  
51 benefit from systematic evaluation of single and clustered BCTs (alongside improvements in  
52 the quality of reporting on intervention descriptions). This would optimise the design and  
53 delivery of social prescribing interventions across the entire pathway (e.g., from initial contract  
54 with a primary care link worker to first appointment with the service providing socially  
55 prescribed activities). Interventions could subsequently be tailored for individuals living with  
56  
57  
58  
59  
60

1  
2  
3 mental health conditions to improve person-centred outcomes. Cross-disciplinary reviews  
4 have identified the use of BCT clusters including goal planning, feedback and monitoring,  
5 social support, and comparison of outcomes, are associated with effectiveness for improving  
6 physical activity, mental health seeking behaviour and employee mental health.[80-82] In  
7 addition, these reviews have highlighted interventions using clusters of BCTs focused on  
8 shaping knowledge and comparison of behaviour and have shown improvements in mental  
9 health seeking behaviour.[81]  
10  
11  
12  
13  
14  
15  
16  
17  
18  
19

20 Despite variable rates of attrition across the studies included in this review, few studies  
21 reported reasons for service users' disengaging from social prescribing. This warrants  
22 attention and further investigation in future research, as well as a more detailed understanding  
23 of why a high proportion of those referred to social prescribing interventions fail to engage.  
24 Both emphasise the need to engage service users in the design and evaluation of social  
25 prescribing interventions with a focus on principles of person-centred care. In addition, this  
26 review has further highlighted the lack of long-term follow up within social prescribing studies.  
27 Future research would benefit from evaluations to establish the long-term impact of social  
28 prescribing on service users' mental health, including specific skills targeted by social  
29 prescribing interventions to improve fidelity assessment.  
30  
31  
32  
33  
34  
35  
36  
37  
38  
39  
40  
41  
42

43 The narrative synthesis presented in the review is based on data aggregated across the  
44 referral pathways adopted by studies. Therefore, future research should conceptualise social  
45 prescribing interventions as complex multi-faceted interventions. There are different referral  
46 pathways for social prescribing, including outside of primary care settings,[83] and the specific  
47 contact points (e.g., initial assessment, interaction with a facilitator or link worker and receipt/  
48 delivery or socially prescribing activity) need to be considered as separate, but linked facets of  
49 a complex multi-faceted intervention involving interactions between healthcare professionals  
50 and service users.  
51  
52  
53  
54  
55  
56  
57  
58  
59  
60

## Conclusions

The predominance of before and after studies and associated methodological concerns, sub-optimal development processes, and limited evidence of treatment fidelity assessments, prevents any robust conclusions on the effectiveness of social prescribing for mental health-related outcomes. Development of future social prescribing interventions would benefit from comprehensive development processes with reference to appropriate frameworks, theories or models (alongside detailed reporting of social prescribing referral pathways), including long-term outcome assessment and adherence to principles of person-centred care.

**Contributors**

MC and DF conceived the review. DF, LA, and JS supervised the review. KA, CJ, and JS assisted MC with study selection, and methodological quality assessment. MC, KA, DF, and LA conducted data extraction. LE designed the search strategy, ran all searches, and collated search results. MC drafted the initial manuscript. All authors revised the manuscript for important intellectual content and approved the final version.

**Funding**

This research received no specific grant from any funding agency in the public, commercial or not-for-profit sectors.

**Competing Interests**

None declared

**Patient Consent**

Not applicable

**Data Sharing Statement**

No original data were generated for this study.

**Ethics Statement**

Not applicable

**REFERENCES**

1. Hassan SM, Giebel C, Morasae EK, et al. Social prescribing for people with mental health needs living in disadvantaged communities: the Life Rooms model. *BMC Health Services Research* 2020;20(1):1-9.
2. England N. Social Prescribing 2019 [Available from: <https://www.england.nhs.uk/contact-us/privacy-notice/how-we-use-your-information/public-and-partners/social-prescribing/>. accessed 01/03/2020.]
3. England N. NHS Long Term Plan 2019 [Available from: <https://www.longtermplan.nhs.uk/>. accessed 10/02/2021.]
4. Chatterjee HJ, Camic PM, Lockyer B, et al. Non-clinical community interventions: a systematised review of social prescribing schemes. *Arts & Health* 2018;10(2):97-123.
5. Moffatt S, Steer M, Lawson S, et al. Link Worker social prescribing to improve health and well-being for people with long-term conditions: qualitative study of service user perceptions. *BMJ Open* 2017;7(7):e015203.
6. White M, Salamon E. An interim evaluation of the 'Arts For Well-being' social prescribing scheme in County Durham. *Durham University: Centre for Medical Humanities* 2010
7. Kimberlee R. What is social prescribing? *Advances in Social Sciences Research Journal* 2015;2(1)
8. Husk K, Blockley K, Lovell R, et al. What approaches to social prescribing work, for whom, and in what circumstances? A realist review. *Health & Social Care in the Community* 2020;28(2):309-24.
9. Bradley G, Scott J. Social Prescribing Nomenclature, Occupational Therapy and the Theory of Institutional Work: Creating, Maintaining and Disrupting Medical Dominance. *Occupational Therapy In Health Care* 2021:1-14.
10. McManus S, Bebbington P, Jenkins R, Brugha T. Mental health and wellbeing in England: Adult Psychiatric Morbidity Survey 2014. Leeds: NHS Digital; 2016.

- 1  
2  
3 11. McDaid D, A-La Park A-L, Davidson G, John A, Lee Knifton L, McDaid S, Morton A,  
4  
5 Thorpe L, Wilson N. The economic case for investing in the prevention of mental  
6  
7 health conditions in the UK. London School of Economics and Political Science /  
8  
9 Mental Health Foundation, 2022  
10
- 11  
12 12. Bickerdike L, Booth A, Wilson PM, et al. Social prescribing: less rhetoric and more  
13  
14 reality. A systematic review of the evidence. *British Medical Journal Open* 2017;7(4)  
15
- 16  
17 13. Cooper M, Ashley K, Jordan C, et al. Active ingredients in social prescription  
18  
19 interventions for adults with mental health issues: a systematic review. Protocol.  
20  
21 *PROSPERO 2020 CRD42020167887 2020*
- 22  
23 14. Moher D, Liberati A, Tetzlaff J, et al. Preferred reporting items for systematic reviews  
24  
25 and meta-analyses: the PRISMA statement. *PLoS Medicine* 2009;6(7):e1000097.  
26
- 27  
28 15. Collaboration C, Training C. Template for Intervention Description and Replication  
29  
30 (TIDieR).
- 31  
32 16. Michie S, Richardson M, Johnston M, et al. The behavior change technique  
33  
34 taxonomy (v1) of 93 hierarchically clustered techniques: building an international  
35  
36 consensus for the reporting of behavior change interventions. *Annals of Behavioral*  
37  
38 *Medicine* 2013;46(1):81-95.
- 39  
40 17. Santana MJ, Manalili K, Jolley RJ, et al. How to practice person-centred care: A  
41  
42 conceptual framework. *Health Expectations* 2018;21(2):429-40.
- 43  
44 18. McCormack B, Dewing J, Mccance T. Developing person-centred care: addressing  
45  
46 contextual challenges through practice development. *Online Journal of Issues in*  
47  
48 *Nursing*. 2011
- 49  
50 19. Moore L, Britten N, Lydahl D, et al. Barriers and facilitators to the implementation of  
51  
52 person-centred care in different healthcare contexts. *Scandinavian Journal of Caring*  
53  
54 *Sciences* 2017;31(4):662-73.
- 55  
56 20. Flynn D, Knoedler MA, Hess EP, et al. Engaging patients in health care decisions in  
57  
58 the emergency department through shared decision-making: a systematic review.  
59  
60 *Academic Emergency Medicine* 2012;19(8):959-67.



- 1  
2  
3 21. Bellg AJ, Borrelli B, Resnick B, et al. Enhancing treatment fidelity in health behavior  
4 change studies: best practices and recommendations from the NIH Behavior Change  
5 Consortium. *Health Psychology* 2004;23(5):443.  
6  
7
- 8  
9 22. Checklist CAS. CASP RCT Checklist 2018 [Available from: [https://casp-uk.net/casp-  
11 tools-checklists/](https://casp-uk.net/casp-<br/>10 tools-checklists/) accessed 05/01/2020.]  
12
- 13 23. Research NHLBI. Quality Assessment Tool for Before-After (Pre-Post) Studies  
14 [Available from: [https://www.nhlbi.nih.gov/health-topics/study-quality-assessment-  
16 tools](https://www.nhlbi.nih.gov/health-topics/study-quality-assessment-<br/>15 tools) accessed 05/01/2020.]  
17  
18
- 19 24. Sterne JAC, Hernan MA, Reeves BC, et al. ROBINS-I: a tool for assessing risk of  
20 bias in non-randomised studies of interventions. *British Medical Journal* 2016; 355;  
21 i4919; doi: 10.1136/bmj.i4919.  
22  
23
- 24 25. Moore SA, Hrisos N, Flynn D, et al. How should long-term free-living physical activity  
25 be targeted after stroke? A systematic review and narrative synthesis. *International  
26 Journal of Behavioral Nutrition and Physical Activity* 2018;15(1):1-19.  
27  
28
- 29 26. Crone DM, O'Connell EE, Tyson PJ, et al. 'Art Lift' intervention to improve mental  
30 well-being: An observational study from UK general practice. *International Journal of  
31 Mental Health Nursing* 2013;22(3):279-86.  
32  
33
- 34 27. Crone DM, Sumner RC, Baker CM, et al. 'Artliff' arts-on-referral intervention in UK  
35 primary care: updated findings from an ongoing observational study. *European  
36 Journal of Public Health* 2018;28(3):404-09.  
37  
38
- 39 28. Sumner RC, Crone DM, Baker C, et al. Factors associated with attendance,  
40 engagement and wellbeing change in an arts on prescription intervention. *Journal of  
41 Public Health* 2019;08:e88-e95.  
42  
43
- 44 29. Sumner R.C, Crone DM, Hughes S, James DV. Arts on prescription: observed  
45 changes in anxiety, depression, and well-being across referral cycles. *Public  
46 Health*, 2021;192:49-55.  
47  
48  
49  
50  
51  
52  
53  
54  
55  
56  
57  
58  
59  
60

- 1  
2  
3 30. van de Venter E BA. Arts on referral interventions: a mixed-methods study  
4 investigating factors associated with differential changes in mental well-being.  
5 *Journal of Public Health* 2014;37(1):143-50.  
6  
7  
8  
9 31. Foster A, Thompson J, Holding E, Ariss S, Mukuria C, Jacques R, Akparido, R,  
10 Haywood A. Impact of social prescribing to address loneliness: A mixed methods  
11 evaluation of a national social prescribing programme. *Health & Social Care in the*  
12 *Community*, 2021; 29(5):1439-1449.  
13  
14  
15  
16  
17 32. Roberts, JR, Windle G. Evaluation of an intervention targeting loneliness and  
18 isolation for older people in North Wales. *Perspectives in Public Health*, 2020;140(3):  
19 153-161.  
20  
21  
22  
23  
24 33. Afuwape SA, Craig TKJ, Harris T, et al. The Cares of Life Project (CoLP): An  
25 exploratory randomised controlled trial of a community-based intervention for black  
26 people with common mental disorder. *Journal of Affective Disorders* 2010;127(1-  
27 3):370-74.  
28  
29  
30  
31  
32 34. Morton L, Ferguson M, Baty F. Improving wellbeing and self-efficacy by social  
33 prescription. *Public Health* 2015;129(3):286-9.  
34  
35  
36  
37 35. Thomson LJ, Morse N, Elsden E, Chatterjee HJ. Art, nature and mental health:  
38 assessing the biopsychosocial effects of a 'creative green prescription' museum  
39 programme involving horticulture, artmaking and collections. *Perspectives in Public*  
40 *health*, 2020;140(5):277-285.  
41  
42  
43  
44  
45 36. Pescheny JV, Gunn LH, Pappas Y, et al. The impact of the Luton social prescribing  
46 programme on mental well-being: a quantitative before-and-after study. *Journal of*  
47 *Public Health* 2019;27:e69-e76.  
48  
49  
50  
51 37. Thomson LJ, Lockyer B, Camic PM, et al. Effects of a museum-based social  
52 prescription intervention on quantitative measures of psychological wellbeing in older  
53 adults. *Perspectives in Public Health* 2018;138(1):28-38.  
54  
55  
56  
57  
58  
59  
60

- 1  
2  
3 38. Kellezi B, Wakefield JRH, Stevenson C, et al. The social cure of social prescribing: A  
4 mixed-methods study on the benefits of social connectedness on quality and  
5 effectiveness of care provision. *BMJ Open* 2019;9(11):e033137.  
6  
7  
8  
9 39. Wakefield JRH, Kellezi B, Stevenson C, McNamara N, Bowe M, Wilson I, Halder  
10 MM, Mair E. Social Prescribing as 'Social Cure': A longitudinal study of the health  
11 benefits of social connectedness within a Social Prescribing pathway. *Journal of*  
12 *Health Psychology*, 2022; 27(2):386-396.  
13  
14  
15  
16  
17 40. Jones M, Kimberlee R, Deave T, et al. The Role of Community Centre-based Arts,  
18 Leisure and Social Activities in Promoting Adult Well-being and Healthy Lifestyles.  
19 *International Journal of Environmental Research and Public Health* 2013;10(5):1948-  
20 62.  
21  
22  
23  
24  
25  
26 41. Carnes D, Sohanpal R, Frostick C, et al. The impact of a social prescribing service  
27 on patients in primary care: a mixed methods evaluation. *BMC Health Services*  
28 *Research* 2017;17:1-9.  
29  
30  
31  
32 42. Maund PR, Irvine KN, Reeves J, et al. Wetlands for wellbeing: Piloting a nature-  
33 based health intervention for the management of anxiety and depression.  
34 *International Journal of Environmental Research and Public Health*  
35 2019;16(22):4413.  
36  
37  
38  
39  
40 43. Baker C, Crone D, Clark-Stone F, Kilgour L. *Art Lift (Extension), Gloucestershire:*  
41 *Evaluation Report*. University of Gloucestershire, U.K., 2013  
42  
43  
44 44. Loughren, EA, Matthews, J, Baker, C., Speke, C. & Crone, D. (2014). *Artlift*  
45 *Gloucestershire: Update Report 2011-2014*. University of Gloucestershire, U.K, 2014  
46  
47  
48 45. Daykin N, McClean S, Pilkington P. *Evaluation of Art Lift: A Partnership Arts and*  
49 *Health Project*. University of Gloucestershire, UK, 2008  
50  
51  
52 46. van de Venter E, Newman L. NHS Bristol. Arts on referral for Inner City Bristol:  
53 evaluation report. Bristol, UK: NHS Bristol, 2011. [Available from:  
54 [https://www.ahsw.org.uk/wp-content/uploads/2019/07/Artshine\\_Evaluation.pdf](https://www.ahsw.org.uk/wp-content/uploads/2019/07/Artshine_Evaluation.pdf) latest  
55 access 01/05/2022]  
56  
57  
58  
59  
60

- 1  
2  
3 47. Arts on Referral. Website [available from: <http://www.artsonreferral.org> latest access  
4 01/05/2022]  
5  
6  
7 48. Holding E, Thompson J, Foster A, Haywood A. Connecting communities: A  
8 qualitative investigation of the challenges in delivering a national social prescribing  
9 service to reduce loneliness. *Health & Social Care in the*  
10 *Community*, 2020;28(5);1535-1543.  
11  
12  
13 49. Co-op Partnership. Website [available from: [https://www.redcross.org.uk/get-](https://www.redcross.org.uk/get-involved/partner-with-us/co-op)  
14 [involved/partner-with-us/co-op](https://www.redcross.org.uk/get-involved/partner-with-us/co-op) latest access 01/05/2022]  
15  
16  
17 50. Tackling Loneliness Together: British Red Cross and Co-op End of Partnership  
18 Report. [available from: [https://www.redcross.org.uk/get-involved/partner-with-us/co-](https://www.redcross.org.uk/get-involved/partner-with-us/co-op)  
19 [op](https://www.redcross.org.uk/get-involved/partner-with-us/co-op) latest access 01/05/2022]  
20  
21  
22 51. Mood Café. Website [available from: <https://www.moodcafe.co.uk> latest access  
23 01/05/2022]  
24  
25  
26 52. Not So Grim Up North (GROW) Report. [available from:  
27 <https://www.artshealthresources.org.uk/docs/not-so-grim-up-north/> latest access  
28 01/05/2022]  
29  
30  
31 53. Pescheny JV, Pappas Y, Randhawa G. Evaluating the implementation and delivery  
32 of a social prescribing intervention: a research protocol. *International Journal of*  
33 *Integrated Care*, 2018; 18(1).  
34  
35  
36 54. Pescheny JV. An evaluation of the implementation and practice of social prescribing,  
37 2019.  
38  
39  
40 55. Pescheny JV, Gunn LH, Randhawa G, Pappa Y. The impact of the Luton social  
41 prescribing programme on energy expenditure: a quantitative before-and-after  
42 study. *British Medical Journal Open* 2019, 9(6), p.e026862.  
43  
44  
45 56. Halder MM, Wakefield JR, Bowe M, Kellezi B, Mair E, McNamara N, Wilson I,  
46 Stevenson C. Evaluation and exploration of a social prescribing initiative: Study  
47 protocol. *Journal of Health Psychology*, 2021;26(3):345-356.  
48  
49  
50 57. *South West Healthy Living Alliance Strategy*; Westbank HLC: Devon, UK, 2009.  
51  
52  
53  
54  
55  
56  
57  
58  
59  
60

- 1  
2  
3 58. Tennant R, Hiller L, Fishwick R, et al. The Warwick-Edinburgh mental well-being  
4 scale (WEMWBS): development and UK validation. *Health and Quality of Life*  
5 *Outcomes* 2007;5(1):1-13.  
6  
7  
8  
9 59. Russell DW. UCLA Loneliness Scale (Version 3): Reliability, validity, and factor  
10 structure. *Journal of Personality Assessment* 1996;66(1):20-40.  
11  
12  
13 60. De Jong-Gierveld J, Kamphuls F. The development of a Rasch-type loneliness  
14 scale. *Applied Psychological Measurement*, 1985;9(3):289-299.  
15  
16  
17 61. Lubben J, Blozik E, Gillmann G, Iliffe S, von Renteln Kruse W, Beck JC, Stuck AE.  
18 Performance of an abbreviated version of the Lubben Social Network Scale among  
19 three European community-dwelling older adult populations. *The*  
20 *Gerontologist*, 2006; 46(4):503-513.  
21  
22  
23 62. Zigmond AS, Snaith RP. The hospital anxiety and depression scale. *Acta*  
24 *Psychiatrica Scandinavica* 1983;67(6):361-70.  
25  
26  
27 63. Spitzer RL, Kroenke K, Williams JB, et al. A brief measure for assessing generalized  
28 anxiety disorder: the GAD-7. *Archives of Internal Medicine* 2006;166(10):1092-97.  
29  
30  
31 64. Kroenke K, Strine TW, Spitzer RL, Williams JB, Berry JT, Mokdad AH. The PHQ-8 as  
32 a measure of current depression in the general population. *Journal of Affective*  
33 *Disorders*, 2009; 114(1-3):163-173.  
34  
35  
36 65. Radloff LS. The CES-D scale: A self-report depression scale for research in the  
37 general population. *Applied Psychological Measurement* 1977;1(3):385-401.  
38  
39  
40 66. Goldberg DP, Hillier VF. A scaled version of the General Health Questionnaire.  
41 *Psychological Medicine* 1979;9(1):139-45.  
42  
43  
44 67. Hall RC. Global assessment of functioning: a modified scale. *Psychosomatics*  
45 1995;36(3):267-75.  
46  
47  
48 68. Diener ED, Emmons RA, Larsen RJ, Griffin S. The satisfaction with life scale. *Journal*  
49 *of Personality Assessment*, 1985;49(1):71-75  
50  
51  
52 69. Group TE. EuroQol-a new facility for the measurement of health-related quality of  
53 life. *Health Policy*, 1990;16(3):199-208.  
54  
55  
56  
57  
58  
59  
60

- 1  
2  
3 70. Jenkinson C, Coulter A, Wright L. Short form 36 (SF36) health survey questionnaire:  
4 normative data for adults of working age. *British Medical Journal*  
5 1993;306(6890):1437-40.  
6  
7  
8  
9 71. Cohen S, Kamarck T, Mermelstein R. Perceived stress scale. *Measuring stress: A*  
10 *guide for health and social scientists* 1994;10(2):1-2.  
11  
12  
13 72. Watson D, Clark LA. The PANAS-X: Manual for the positive and negative affect  
14 schedule-expanded form, 1999.  
15  
16  
17 73. Council MR. Developing and evaluating complex interventions: new guidance.  
18 Medical Research Council, 2008.  
19  
20  
21 74. Haslam C, Jetten J, Cruwys T, et al. *The new psychology of health. Unlocking the*  
22 *social cure*. London:Routledge, 2018  
23  
24  
25 75. Polley M, Pilkington K. A review of the evidence assessing impact of social  
26 prescribing on healthcare demand and cost implications 2017 [Available from:  
27 [https://westminsterresearch.westminster.ac.uk/item/q1455/a-review-of-the-evidence-](https://westminsterresearch.westminster.ac.uk/item/q1455/a-review-of-the-evidence-assessing-impact-of-social-prescribing-on-healthcare-demand-and-cost-implications)  
28 [assessing-impact-of-social-prescribing-on-healthcare-demand-and-cost-implications.](https://westminsterresearch.westminster.ac.uk/item/q1455/a-review-of-the-evidence-assessing-impact-of-social-prescribing-on-healthcare-demand-and-cost-implications)  
29  
30  
31  
32  
33  
34  
35 Accessed on 14/09/2021.]  
36  
37 76. Longwill A. Independent evaluation of Hackney WellFamily service. *Improving Health*  
38 *and Wellbeing UK* 2014  
39  
40  
41 77. Brandling J, House W. Social prescribing in general practice: adding meaning to  
42 medicine. *British Journal of General Practice* 2009;59(563):454-56.  
43  
44  
45 78. Polley M, Whiteside J, Elnaschie S, et al. What does successful social prescribing  
46 look like? Mapping meaningful outcomes: London University of Westminster, 2020.  
47  
48  
49 79. Gov.UK. Population of England and Wales 01/08/2018; 2018 [Available from:  
50 [https://www.ethnicity-facts-figures.service.gov.uk/uk-population-by-ethnicity/national-](https://www.ethnicity-facts-figures.service.gov.uk/uk-population-by-ethnicity/national-and-regional-populations/population-of-england-and-wales/latest)  
51 [and-regional-populations/population-of-england-and-wales/latest](https://www.ethnicity-facts-figures.service.gov.uk/uk-population-by-ethnicity/national-and-regional-populations/population-of-england-and-wales/latest) accessed  
52  
53  
54  
55  
56  
57  
58  
59  
60

- 1  
2  
3 80. French DP, Olander EK, Chisholm A, et al. Which behaviour change techniques are  
4 most effective at increasing older adults' self-efficacy and physical activity behaviour?  
5 A systematic review. *Annals of Behavioral Medicine* 2014;48(2):225-34.  
6  
7  
8  
9 81. Sagar-Ouriaghli I, Godfrey E, Bridge L, et al. Improving mental health service  
10 utilization among men: a systematic review and synthesis of behavior change  
11 techniques within interventions targeting help-seeking. *American Journal of Men's*  
12 *Health* 2019;13(3):1557988319857009.  
13  
14  
15  
16  
17 82. De Korte E, Wiezer N, Roozeboom MB, et al. Behavior change techniques in  
18 mhealth apps for the mental and physical health of employees: Systematic  
19 assessment. *Journal Medical Internet Research mHealth and uHealth*  
20 2018;6(10):e167.  
21  
22  
23  
24  
25  
26 83. Scott J, Fidler G, Monk D, et al. Exploring the potential for social prescribing in  
27 pre-hospital emergency and urgent care: A qualitative study. *Health & Social Care in*  
28 *the Community* 2021;29(3):654-63.  
29  
30  
31  
32  
33  
34  
35  
36  
37  
38  
39  
40  
41  
42  
43  
44  
45  
46  
47  
48  
49  
50  
51  
52  
53  
54  
55  
56  
57  
58  
59  
60

## LEGEND

### Figure 1 – PRISMA Diagram

### Table 1- Summary of Study Characteristics

Footnotes:

^Terminology used by authors.

\* Multiple Sector – Referral from a combination of the following: General Practitioner, Health Care Professional, Community, Self-referral, Secondary Care or Social Care.

\*\* Not explicitly reported, calculated by authors

+ In = in work, education, or position of responsibility

++ Out = out of work, education, or position of responsibility

NR- Not reported

### Table 2- Between and Within Group Changes in Outcomes

Footnotes:

\*Components of the Southwest Well Being Questionnaire

Generalised Anxiety Disorder (GAD-7), Global Assessment of Functioning (GAF), General Health Questionnaire-28 (GHQ-28), General Health Score (GHS), Hospital Anxiety and Depression Scale (HADS), Museum Wellbeing Measure for Older Adults (MWM-OA), Perceived Stress Scale (PSS) Positive and Negative Affect Schedule (PANAS), University College London Loneliness Scale (ULS-8), Short Form-36 (SF-36), Southwest Well-being Questionnaire (SWWBQ), Warwick-Edinburgh Mental Wellbeing Scale (WEMWBS), Patient Health Questionnaire (PHQ-8), EuroQoL Quality of Life Measure (EQ5D), Centre for Epidemiology Depression Scale (CES-D-7).

### Figure 2 – Frequency of Individual BCT's Across Included Interventions

### Figure 3 - Frequency of BCT Groupings Across the Included Interventions



Figure 1: PRISMA Diagram

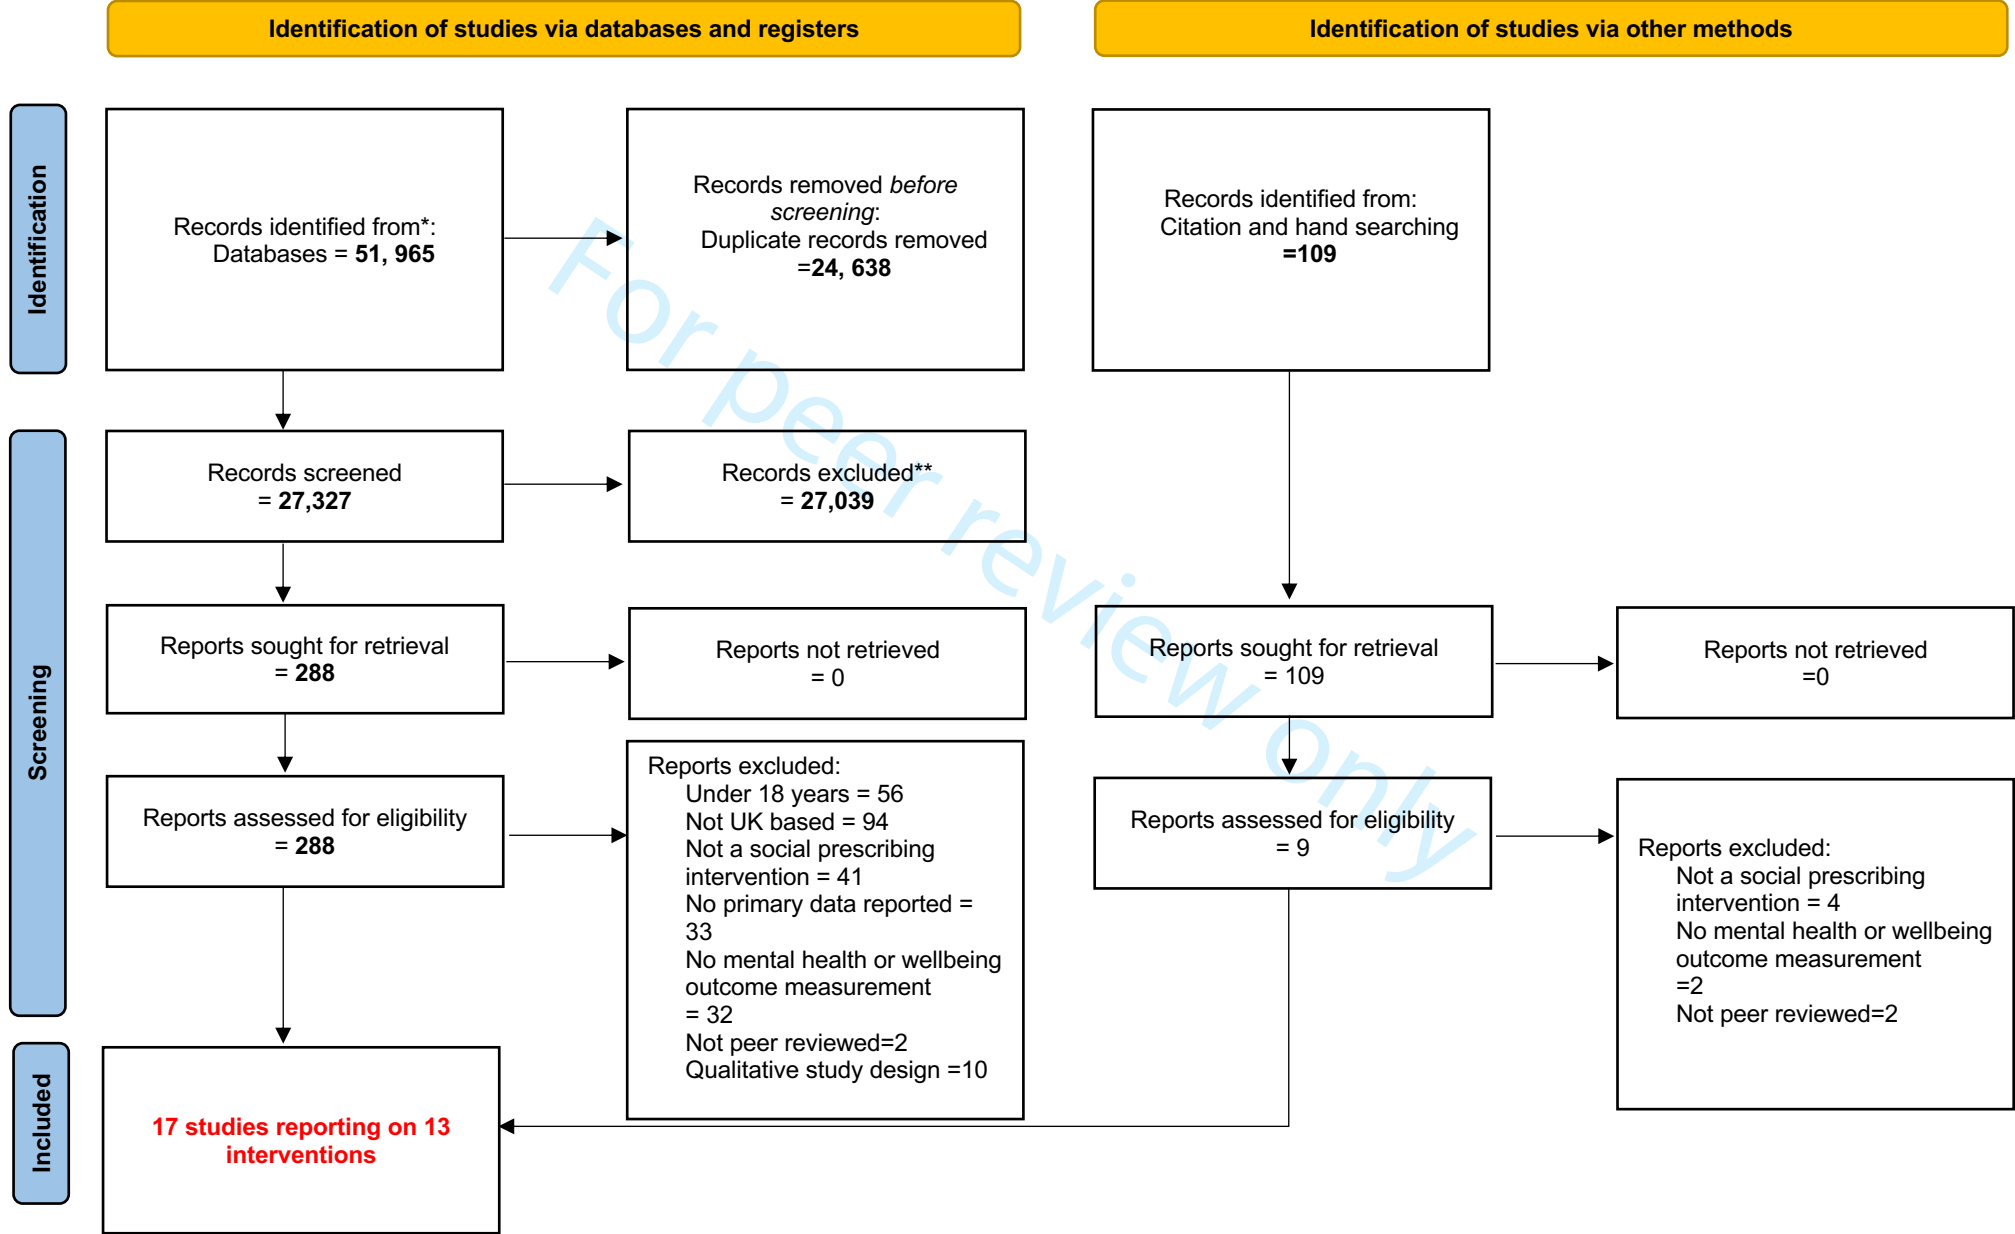

Figure 2: **Frequency of Individual BCT's Across Included Interventions**

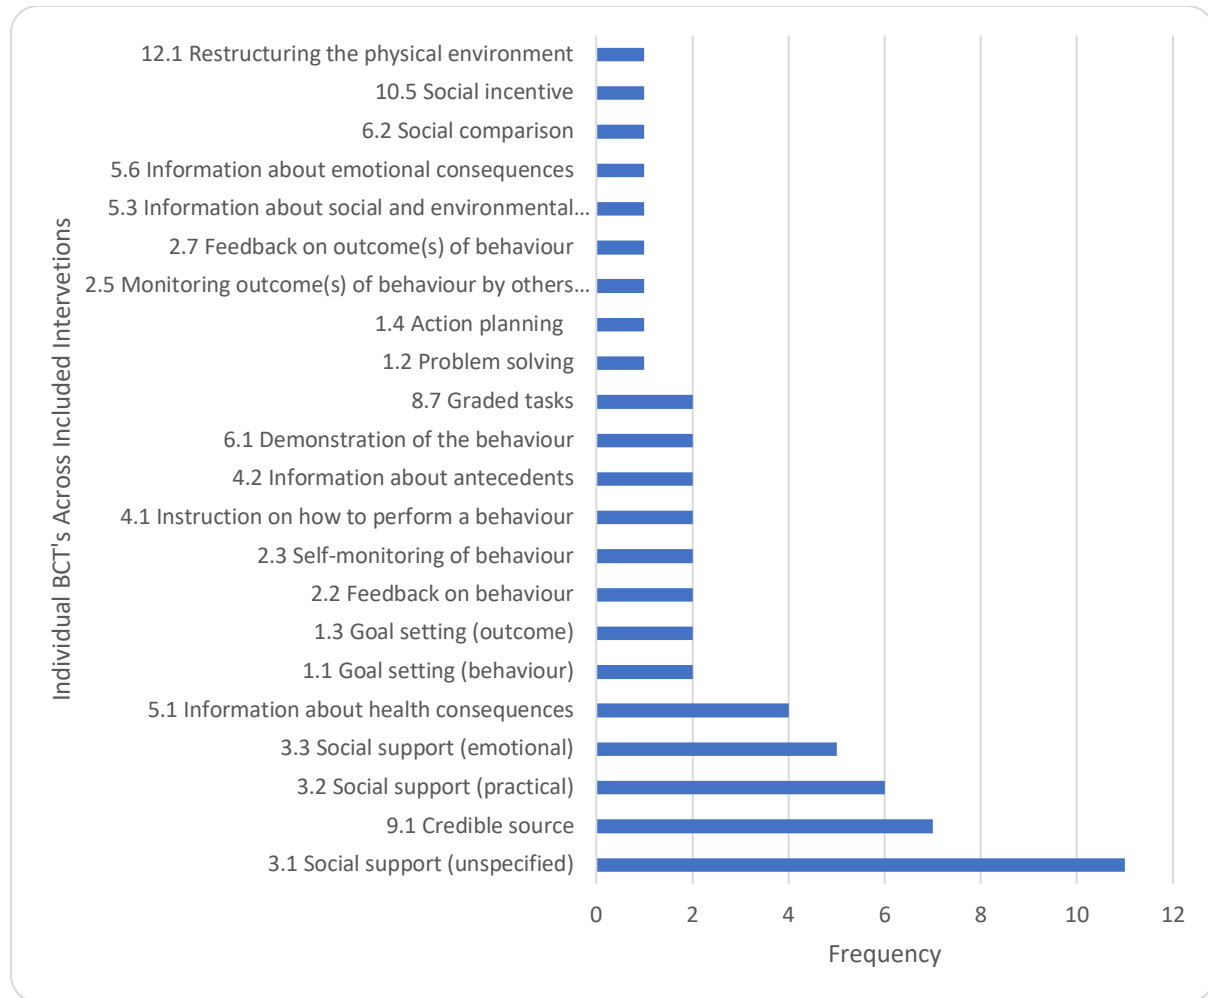

View only

1  
2  
3  
4  
5  
6  
7  
8  
9  
10  
11  
12  
13  
14  
15  
16  
17  
18  
19  
20  
21  
22  
23  
24  
25  
26  
27  
28  
29  
30  
31  
32  
33  
34  
35  
36  
37  
38  
39  
40  
41  
42  
43  
44  
45  
46  
47  
48  
49  
50  
51  
52  
53  
54  
55  
56  
57  
58  
59  
60

Figure 3: **Frequency of BCT Groupings Across the Included Interventions**

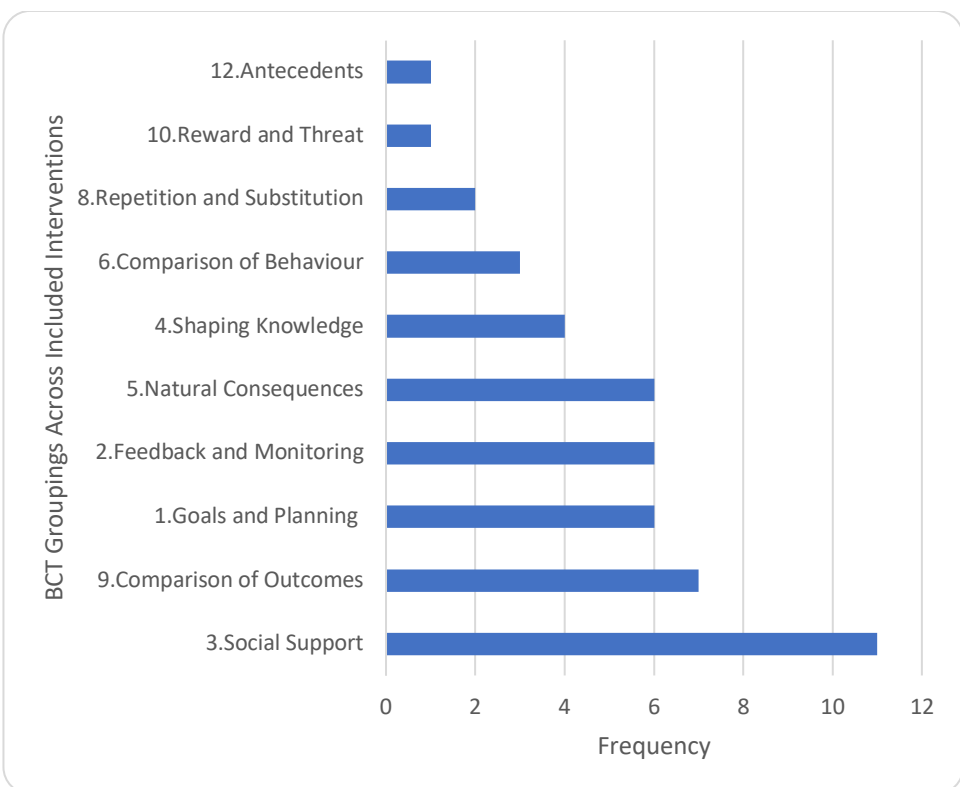

review only

## Supplementary Materials 1

## Prisma Checklist

| Section and Topic             | Item # | Checklist item                                                                                                                                                                                                                                                                                       | Location where item is reported  |
|-------------------------------|--------|------------------------------------------------------------------------------------------------------------------------------------------------------------------------------------------------------------------------------------------------------------------------------------------------------|----------------------------------|
| <b>TITLE</b>                  |        |                                                                                                                                                                                                                                                                                                      |                                  |
| Title                         | 1      | Identify the report as a systematic review.                                                                                                                                                                                                                                                          | 1                                |
| <b>ABSTRACT</b>               |        |                                                                                                                                                                                                                                                                                                      |                                  |
| Abstract                      | 2      | See the PRISMA 2020 for Abstracts checklist.                                                                                                                                                                                                                                                         | 2                                |
| <b>INTRODUCTION</b>           |        |                                                                                                                                                                                                                                                                                                      |                                  |
| Rationale                     | 3      | Describe the rationale for the review in the context of existing knowledge.                                                                                                                                                                                                                          | 5-6                              |
| Objectives                    | 4      | Provide an explicit statement of the objective(s) or question(s) the review addresses.                                                                                                                                                                                                               | 6                                |
| <b>METHODS</b>                |        |                                                                                                                                                                                                                                                                                                      |                                  |
| Eligibility criteria          | 5      | Specify the inclusion and exclusion criteria for the review and how studies were grouped for the syntheses.                                                                                                                                                                                          | 7                                |
| Information sources           | 6      | Specify all databases, registers, websites, organisations, reference lists and other sources searched or consulted to identify studies. Specify the date when each source was last searched or consulted.                                                                                            | 7                                |
| Search strategy               | 7      | Present the full search strategies for all databases, registers and websites, including any filters and limits used.                                                                                                                                                                                 | 8<br>(supplementary materials 2) |
| Selection process             | 8      | Specify the methods used to decide whether a study met the inclusion criteria of the review, including how many reviewers screened each record and each report retrieved, whether they worked independently, and if applicable, details of automation tools used in the process.                     | 8                                |
| Data collection process       | 9      | Specify the methods used to collect data from reports, including how many reviewers collected data from each report, whether they worked independently, any processes for obtaining or confirming data from study investigators, and if applicable, details of automation tools used in the process. | 8                                |
| Data items                    | 10a    | List and define all outcomes for which data were sought. Specify whether all results that were compatible with each outcome domain in each study were sought (e.g. for all measures, time points, analyses), and if not, the methods used to decide which results to collect.                        | 9                                |
|                               | 10b    | List and define all other variables for which data were sought (e.g. participant and intervention characteristics, funding sources). Describe any assumptions made about any missing or unclear information.                                                                                         | 9                                |
| Study risk of bias assessment | 11     | Specify the methods used to assess risk of bias in the included studies, including details of the tool(s) used, how many reviewers assessed each study and whether they worked independently, and if applicable, details of automation tools used in the process.                                    | 10                               |
| Effect measures               | 12     | Specify for each outcome the effect measure(s) (e.g. risk ratio, mean difference) used in the synthesis or presentation of results.                                                                                                                                                                  | 10                               |
| Synthesis methods             | 13a    | Describe the processes used to decide which studies were eligible for each synthesis (e.g. tabulating the study intervention characteristics and comparing against the planned groups for each synthesis (item #5)).                                                                                 | 10                               |

| Section and Topic             | Item # | Checklist item                                                                                                                                                                                                                                                                       | Location where item is reported |
|-------------------------------|--------|--------------------------------------------------------------------------------------------------------------------------------------------------------------------------------------------------------------------------------------------------------------------------------------|---------------------------------|
|                               | 13b    | Describe any methods required to prepare the data for presentation or synthesis, such as handling of missing summary statistics, or data conversions.                                                                                                                                | N/A                             |
|                               | 13c    | Describe any methods used to tabulate or visually display results of individual studies and syntheses.                                                                                                                                                                               | N/A                             |
|                               | 13d    | Describe any methods used to synthesize results and provide a rationale for the choice(s). If meta-analysis was performed, describe the model(s), method(s) to identify the presence and extent of statistical heterogeneity, and software package(s) used.                          | N/A                             |
|                               | 13e    | Describe any methods used to explore possible causes of heterogeneity among study results (e.g. subgroup analysis, meta-regression).                                                                                                                                                 | N/A                             |
|                               | 13f    | Describe any sensitivity analyses conducted to assess robustness of the synthesized results.                                                                                                                                                                                         | N/A                             |
| Reporting bias assessment     | 14     | Describe any methods used to assess risk of bias due to missing results in a synthesis (arising from reporting biases).                                                                                                                                                              | 10                              |
| Certainty assessment          | 15     | Describe any methods used to assess certainty (or confidence) in the body of evidence for an outcome.                                                                                                                                                                                | N/A                             |
| <b>RESULTS</b>                |        |                                                                                                                                                                                                                                                                                      |                                 |
| Study selection               | 16a    | Describe the results of the search and selection process, from the number of records identified in the search to the number of studies included in the review, ideally using a flow diagram.                                                                                         | 11                              |
|                               | 16b    | Cite studies that might appear to meet the inclusion criteria, but which were excluded, and explain why they were excluded.                                                                                                                                                          | 11                              |
| Study characteristics         | 17     | Cite each included study and present its characteristics.                                                                                                                                                                                                                            | 14-17                           |
| Risk of bias in studies       | 18     | Present assessments of risk of bias for each included study.                                                                                                                                                                                                                         | 21                              |
| Results of individual studies | 19     | For all outcomes, present, for each study: (a) summary statistics for each group (where appropriate) and (b) an effect estimate and its precision (e.g. confidence/credible interval), ideally using structured tables or plots.                                                     | 20                              |
| Results of syntheses          | 20a    | For each synthesis, briefly summarise the characteristics and risk of bias among contributing studies.                                                                                                                                                                               | N/A                             |
|                               | 20b    | Present results of all statistical syntheses conducted. If meta-analysis was done, present for each the summary estimate and its precision (e.g. confidence/credible interval) and measures of statistical heterogeneity. If comparing groups, describe the direction of the effect. | N/A                             |
|                               | 20c    | Present results of all investigations of possible causes of heterogeneity among study results.                                                                                                                                                                                       | N/A                             |
|                               | 20d    | Present results of all sensitivity analyses conducted to assess the robustness of the synthesized results.                                                                                                                                                                           | N/A                             |
| Reporting biases              | 21     | Present assessments of risk of bias due to missing results (arising from reporting biases) for each synthesis assessed.                                                                                                                                                              | N/A                             |
| Certainty of evidence         | 22     | Present assessments of certainty (or confidence) in the body of evidence for each outcome assessed.                                                                                                                                                                                  | N/A                             |
| <b>DISCUSSION</b>             |        |                                                                                                                                                                                                                                                                                      |                                 |
| Discussion                    | 23a    | Provide a general interpretation of the results in the context of other evidence.                                                                                                                                                                                                    | 26 onwards                      |

| Section and Topic                              | Item # | Checklist item                                                                                                                                                                                                                             | Location where item is reported |
|------------------------------------------------|--------|--------------------------------------------------------------------------------------------------------------------------------------------------------------------------------------------------------------------------------------------|---------------------------------|
|                                                | 23b    | Discuss any limitations of the evidence included in the review.                                                                                                                                                                            | 28                              |
|                                                | 23c    | Discuss any limitations of the review processes used.                                                                                                                                                                                      | 28                              |
|                                                | 23d    | Discuss implications of the results for practice, policy, and future research.                                                                                                                                                             | 28-29                           |
| <b>OTHER INFORMATION</b>                       |        |                                                                                                                                                                                                                                            |                                 |
| Registration and protocol                      | 24a    | Provide registration information for the review, including register name and registration number, or state that the review was not registered.                                                                                             | 7                               |
|                                                | 24b    | Indicate where the review protocol can be accessed, or state that a protocol was not prepared.                                                                                                                                             | 7                               |
|                                                | 24c    | Describe and explain any amendments to information provided at registration or in the protocol.                                                                                                                                            | N/A                             |
| Support                                        | 25     | Describe sources of financial or non-financial support for the review, and the role of the funders or sponsors in the review.                                                                                                              | 31                              |
| Competing interests                            | 26     | Declare any competing interests of review authors.                                                                                                                                                                                         | 31                              |
| Availability of data, code and other materials | 27     | Report which of the following are publicly available and where they can be found: template data collection forms; data extracted from included studies; data used for all analyses; analytic code; any other materials used in the review. | Supplementary Files             |

## Supplementary Material 2

### Search strategy used

#### Cochrane search:

("mental health" OR "mental disease\*" OR "mental disorder\*" OR anxiety OR bipolar OR "disruptive impulse control" OR "conduct disorder\*" OR "dissociative disorder\*" OR "eating disorder\*" OR "feeding disorder\*" OR "mood disorder\*" OR "personality disorder\*" OR "somatoform disorder\*" OR trauma OR "stress\* related disorder\*" OR depression OR wellbeing OR well-being OR "psychiatric disorder\*" OR "psychiatric problem" OR "non-medical symptom\*" OR "psychosocial problem" OR "psycho-social problem" OR mups OR "medically unexplained physical symptom\*" OR "mental difficult\*" OR recovery OR "social function\*"):ti,ab,kw

AND

(social near/4 (prescri\* OR referral OR intervention)):ti,ab,kw OR (community near/4 (prescri\* OR referral OR intervention)):ti,ab,kw OR ("linking scheme\*" OR u3a OR "university of the third age" OR "buddy scheme\*" OR "men's shed" OR ecotherapy OR "individual placement" OR "supported employment" OR "non-medical referral" OR "non-clinical referral"):ti,ab,kw OR ((wellbeing near/2 referral)):ti,ab,kw OR ((well-being near/2 referral)):ti,ab,kw

#### Scopus Search:

(( (TITLE-ABS-KEY ("mental health" OR "mental disease\*" OR "mental disorder\*" OR anxiety OR bipolar OR "disruptive impulse control" OR "conduct disorder\*" OR "dissociative disorder\*" OR "eating disorder\*" OR "feeding disorder\*" OR "mood disorder\*" OR "personality disorder\*") OR TITLE-ABS-KEY ("somatoform disorder\*" OR trauma OR "stress\* related disorder\*" OR "mental\* ill\*" OR depression OR wellbeing OR well-being OR "psychiatric disorder\*" OR "psychiatric problem" ) ) ) OR ( TITLE-ABS-KEY ( "non-medical symptoms" OR psychosocial OR psycho-social OR mups OR "medically unexplained physical" OR "mental difficult\*" OR recovery OR "social function\*" ) ) ) AND ( ( (TITLE-ABS-KEY ( social W/4 ( prescri\* OR referral OR intervention ) ) ) OR ( TITLE-ABS-KEY ( community W/4 ( prescri\* OR referral OR intervention ) ) ) OR ( TITLE-ABS-KEY ( "linking scheme\*" OR u3a OR "university of the third age" OR "buddy scheme\*" OR "men's shed" ) ) ) OR ( TITLE-ABS-KEY ( ecotherapy OR "individual placement" OR "supported employment" OR "non-medical referral" OR "non-clinical referral" ) ) ) ) )

#### Web of Science Search:

(( TS=( prescri\* near/4 ( exercis\* OR education OR learning OR arts ) ) ) ) OR ( TS=( "information referral" OR "social referral" OR "green gym" OR "sign-posting intervention" OR "healthy living" OR "time bank" OR "supported referral" OR "non-clinical intervention" OR ecotherapy OR "employment skills" OR "individual placement" ) ) ) OR ( TS=( "supported employment" OR "non-medical referral" OR

"non-clinical referral" ) ) OR ( TS=( wellbeing near/2 referral ) ) OR (TS=( well-being near/2 referral ) ) OR ( ( TS=( social near/4 ( prescri\* OR referral OR intervention) ) ) OR ( TS=( community near/4 ( prescri\* OR referral OR intervention) ) ) OR ( TS=( "linking scheme\*" OR u3a OR "university of the third age" OR "buddy scheme\*" OR "men's shed" ) ) ) ) AND ( ( TS=( "mental health" OR "mental disease\*" OR "mental disorder\*" OR anxiety OR bipolar OR "disruptive impulse control" OR "conduct disorder\*" OR "dissociative disorder\*" OR "eating disorder\*" OR "feeding disorder\*" OR "mood disorder\*" OR "personality disorder\*" ) OR TS=( "somatoform disorder\*" OR trauma OR "stress\* related disorder\*" OR "mental\* ill\*" OR depression OR wellbeing OR well-being OR "psychiatric disorder\*" OR "psychiatric problem" ) ) ) OR ( TS=( "non-medical symptoms" OR "psychosocial problem" OR "psycho-social problem" OR mups OR "medically unexplained physical" OR "mental difficult\*" OR "ill health" OR recovery OR "social function\*" ) ) )  
 Indexes=SCI-EXPANDED, SSCI, A&HCI, CPCI-S, CPCI-SSH, ESCI Timespan=All years

### Medline/ Embase/ PsychINFO search:

- 1 (Social adj4 (prescri\* or referral or intervention)).mp.
- 2 (community adj4 (prescri\* or referral or intervention)).mp.
- 3 linking scheme\*.mp.
- 4 u3a.mp.
- 5 university of the third age.mp.
- 6 buddy scheme\*.mp.
- 7 men's shed.mp.
- 8 (prescri\* adj4 (exercis\* or education or learning or arts)).mp.
- 9 information referral.mp.
- 10 social referral.mp.
- 11 green gym.mp.
- 12 time bank.mp.
- 13 supported referral.mp.
- 14 (well-being adj2 referral).mp.
- 15 (wellbeing adj2 referral).mp.
- 16 ecotherapy.mp.
- 17 Individual Placement.mp.
- 18 supported employment.mp.
- 19 non-medical referral.mp.
- 20 non-clinical referral.mp.
- 21 or/1-20
- 22 Mental Health/
- 23 mental disorders/ or anxiety disorders/ or "bipolar and related disorders"/ or "disruptive, impulse control, and conduct disorders"/ or dissociative disorders/ or "feeding and eating



1  
2  
3  
4  
5  
6  
7  
8  
9  
10  
11  
12  
13  
14  
15  
16  
17  
18  
19  
20  
21  
22  
23  
24  
25  
26  
27  
28  
29  
30  
31  
32  
33  
34  
35  
36  
37  
38  
39  
40  
41  
42  
43  
44  
45  
46  
47  
48  
49  
50  
51  
52  
53  
54  
55  
56  
57  
58  
59  
60

disorders"/ or mood disorders/ or personality disorders/ or somatoform disorders/ or "trauma and stressor related disorders"/

- 24 mental\* ill\*.mp.
- 25 Depression/
- 26 exp Anxiety/
- 27 wellbeing.mp.
- 28 well-being.mp.
- 29 psychiatric disorder\*.mp.
- 30 psychiatric problem.mp.
- 31 non-medical symptoms.mp.
- 32 psycho-social problem\*.mp.
- 33 psychosocial problem\*.mp.
- 34 mups.mp.
- 35 medically unexplained physical symptoms.mp.
- 36 non-medical problem.mp.
- 37 mental difficult\*.mp.
- 38 recovery.mp.
- 39 Mental Health Recovery/
- 40 social function\*.mp.
- 41 or/22-40
- 42 21 and 41

\*\*\*\*\*

1  
2 **Supplementary Materials 3**

3  
4 **Methodological Quality Assessments**

5  
6

| <b>CASP Randomised Controlled Trial Checklist</b>                                          | <b>Max Score 22</b>                     |
|--------------------------------------------------------------------------------------------|-----------------------------------------|
| <b>Intervention Name</b>                                                                   | Cares of Life (Afwape, et al. 2010)(33) |
| Did the trial address a clearly focused issue?                                             | Yes                                     |
| Was the assignment of patients who entered the trial properly accounted for at conclusion? | Yes                                     |
| Were patients, health workers and study personnel 'blind' to treatment?                    | Yes                                     |
| Were the groups similar at the start of the trial?                                         | Yes                                     |
| Aside from the experimental intervention, were the groups treated equally?                 | Yes                                     |
| How large was the treatment effect?                                                        | Unclear                                 |
| How precise was the estimate of the treatment?                                             | Unclear                                 |
| Can the results be applied to the local population or in your context?                     | Yes                                     |
| Were all clinically important outcomes considered?                                         | Yes                                     |
| Are the benefits worth the harms and costs?                                                | Yes                                     |
|                                                                                            |                                         |
| <b>Total CASP Checklist Score</b>                                                          | <b>20</b>                               |
| <i>(Yes=2, Unclear=1, No=0)</i>                                                            |                                         |

7  
8  
9  
10  
11  
12  
13  
14  
15  
16  
17  
18  
19  
20  
21  
22  
23  
24  
25  
26  
27  
28  
29  
30  
31  
32  
33  
34  
35  
36  
37  
38  
39  
40  
41  
42  
43  
44  
45  
46

| <b>The Risk of Bias in Non-Randomised Studies of Interventions ROBINS-I</b>                                                                             |                 |
|---------------------------------------------------------------------------------------------------------------------------------------------------------|-----------------|
| <b>Intervention Name</b> No name provided (Carnes et al 2017)(41)                                                                                       |                 |
| <b>Bias due to confounding</b>                                                                                                                          |                 |
| 1.1 Is there potential for confounding of the effect of intervention in this study?                                                                     | Yes             |
| 1.2. Was the analysis based on splitting participants' follow up time according to intervention received?                                               | No              |
| 1.3. Were intervention discontinuations or switches likely to be related to factors that are prognostic for the outcome?                                | N/A             |
| <b>Questions relating to baseline confounding only</b>                                                                                                  |                 |
| 1.4. Did the authors use an appropriate analysis method that controlled for all the important confounding domains?                                      | <b>Yes</b>      |
| 1.5. Were confounding domains that were controlled for measured validly and reliably by the variables available in this study?                          | Yes             |
| 1.6. Did the authors control for any post-intervention variables that could have been affected by the intervention?                                     | No              |
| <b>Questions relating to baseline and time-varying confounding</b>                                                                                      |                 |
| 1.7. Did the authors use an appropriate analysis method that controlled for all the important confounding domains and for time-varying confounding?     | NA              |
| 1.8. Were confounding domains that were controlled for measured validly and reliably by the variables available in this study?                          | NA              |
| <b>Risk of bias judgement</b>                                                                                                                           | <b>Moderate</b> |
| <b>Bias in selection of participants into the study</b>                                                                                                 |                 |
| 2.1. Was selection of participants into the study (or into the analysis) based on participant characteristics observed after the start of intervention? | No              |
| 2.2. Were the post-intervention variables that influenced selection likely to be associated with intervention?                                          | N/A             |
| 2.3. Were the post-intervention variables that influenced selection likely to be influenced by the outcome or a cause of the outcome?                   | N/A             |
| 2.4. Do start of follow-up and start of intervention coincide for most participants?                                                                    | Yes             |
| 2.5. Were adjustment techniques used that are likely to correct for the presence of selection biases?                                                   | N/A             |
| <b>Risk of bias judgement</b>                                                                                                                           | <b>Low</b>      |

|                                                                                                                                 |                 |
|---------------------------------------------------------------------------------------------------------------------------------|-----------------|
| <b>Bias in classification of interventions</b>                                                                                  |                 |
| 3.1 Were intervention groups clearly defined?                                                                                   | Yes             |
| 3.2 Was the information used to define intervention groups recorded at the start of the intervention?                           | Yes             |
| 3.3 Could classification of intervention status have been affected by knowledge of the outcome or risk of the outcome?          | No              |
| <b>Risk of bias judgement</b>                                                                                                   | Low             |
| <b>Bias due to deviations from intended interventions</b>                                                                       |                 |
| 4.1. Were there deviations from the intended intervention beyond what would be expected in usual practice?                      | No information  |
| 4.2. Were these deviations from intended intervention unbalanced between groups <i>and</i> likely to have affected the outcome? | No information  |
| <b>Risk of bias judgement</b>                                                                                                   | No information  |
| <b>Bias due to missing data</b>                                                                                                 |                 |
| 5.1 Were outcome data available for all, or nearly all, participants?                                                           | Yes             |
| 5.2 Were participants excluded due to missing data on intervention status?                                                      | No              |
| 5.3 Were participants excluded due to missing data on other variables needed for the analysis?                                  | No              |
| 5.4 Are the proportion of participants and reasons for missing data similar across interventions?                               | N/A             |
| 5.5 Is there evidence that results were robust to the presence of missing data?                                                 | Yes             |
| <b>Risk of bias judgement</b>                                                                                                   | Moderate        |
| <b>Bias in measurement of outcomes</b>                                                                                          |                 |
| 6.1 Could the outcome measure have been influenced by knowledge of the intervention received?                                   | No              |
| 6.2 Were outcome assessors aware of the intervention received by study participants?                                            | No information  |
| 6.3 Were the methods of outcome assessment comparable across intervention groups?                                               | Yes             |
| 6.4 Were any systematic errors in measurement of the outcome related to intervention received?                                  | No information  |
| <b>Risk of bias judgement</b>                                                                                                   | Moderate        |
| <b>Bias in selection of the reported result</b>                                                                                 |                 |
| Is the reported effect estimate likely to be selected, on the basis of the results, from...                                     |                 |
| 7.1. ... multiple outcome <i>measurements</i> within the outcome domain?                                                        | No              |
| 7.2 ... multiple <i>analyses</i> of the intervention-outcome relationship?                                                      | No              |
| 7.3 ... different <i>subgroups</i> ?                                                                                            | No              |
| <b>Risk of bias judgement</b>                                                                                                   | Moderate        |
| <b>Overall bias Risk of bias judgement</b>                                                                                      | <b>Moderate</b> |

| <b>NHLBI Quality Assessment Tool for Before-After (Pre-Post) Studies</b>                                                                                              |                                |                               |                                |                                |                                       |                                                  |                                 |                                |                                      |                                  |
|-----------------------------------------------------------------------------------------------------------------------------------------------------------------------|--------------------------------|-------------------------------|--------------------------------|--------------------------------|---------------------------------------|--------------------------------------------------|---------------------------------|--------------------------------|--------------------------------------|----------------------------------|
| <b>Intervention Name</b>                                                                                                                                              | <b>Art Lift</b>                |                               |                                |                                | <b>Art Shine</b>                      | <b>British Red Cross; Connecting Communities</b> | <b>Cadwyn Mon</b>               | <b>Fife SP (Mood Café)</b>     | <b>GROW: Art, Park and Wellbeing</b> | <b>Luton SP Programme</b>        |
| <b>Author(s) of Corresponding Study(s)</b>                                                                                                                            | <b>Crone, et al. 2013 (26)</b> | <b>Crone, et al. 2018(27)</b> | <b>Sumner, et al. 2019(28)</b> | <b>Sumner, et al. 2021(29)</b> | <b>van de Venter, et al. 2014(30)</b> | <b>Foster, et al. 2020(31)</b>                   | <b>Roberts, et al. 2020(32)</b> | <b>Morton, et al. 2015(34)</b> | <b>Thomson, et al. 2020(35)</b>      | <b>Pescheny, et al. 2019(36)</b> |
| Was the study question or objective clearly stated?                                                                                                                   | <b>Yes</b>                     | <b>Yes</b>                    | <b>Yes</b>                     | <b>Yes</b>                     | <b>Yes</b>                            | <b>Yes</b>                                       | <b>Yes</b>                      | <b>Yes</b>                     | <b>Yes</b>                           | <b>Yes</b>                       |
| Were eligibility/ selection criteria for the study population prespecified and clearly described?                                                                     | <b>No</b>                      | <b>No</b>                     | <b>Yes</b>                     | <b>No</b>                      | <b>Yes</b>                            | <b>No</b>                                        | <b>Yes</b>                      | <b>No</b>                      | <b>No</b>                            | <b>Yes</b>                       |
| Were the participants in the study representative of those who would be eligible for the test/service/intervention in the general or clinical population of interest? | <b>Yes</b>                     | <b>Yes</b>                    | <b>Yes</b>                     | <b>Yes</b>                     | <b>Yes</b>                            | <b>Yes</b>                                       | <b>Yes</b>                      | <b>Yes</b>                     | <b>Yes</b>                           | <b>Yes</b>                       |
| Were all eligible participants that met the prespecified entry criteria enrolled?                                                                                     | <b>Yes</b>                     | <b>UC</b>                     | <b>UC</b>                      | <b>UC</b>                      | <b>No</b>                             | <b>UC</b>                                        | <b>No</b>                       | <b>UC</b>                      | <b>UC</b>                            | <b>UC</b>                        |
| Was the sample size sufficiently large to provide confidence in the findings?                                                                                         | <b>UC</b>                      | <b>UC</b>                     | <b>UC</b>                      | <b>UC</b>                      | <b>UC</b>                             | <b>UC</b>                                        | <b>UC</b>                       | <b>UC</b>                      | <b>UC</b>                            | <b>UC</b>                        |
| Was the test/ service/ intervention clearly described and delivered consistently across the - study population?                                                       | <b>UC</b>                      | <b>Yes</b>                    | <b>No</b>                      | <b>No</b>                      | <b>Yes</b>                            | <b>Yes</b>                                       | <b>Yes</b>                      | <b>No</b>                      | <b>No</b>                            | <b>Yes</b>                       |

|                                                                                                                                                                                               |          |           |           |           |           |           |           |           |           |           |
|-----------------------------------------------------------------------------------------------------------------------------------------------------------------------------------------------|----------|-----------|-----------|-----------|-----------|-----------|-----------|-----------|-----------|-----------|
| Were the outcome measures prespecified, clearly defined, valid, reliable, and assessed consistently across all study participants?                                                            | No       | Yes       |
| Were the people assessing the outcomes blinded to the participants' exposures/interventions?                                                                                                  | N/A*     | N/A*      | N/A*      | N/A*      | N/A*      | N/A*      | N/A*      | N/A*      | N/A*      | N/A*      |
| Was the loss to follow-up after baseline 20% or less? Were those lost to follow-up accounted for in the analysis?                                                                             | No       | No        | No        | No        | UC        | No        | No        | No        | UC        | No        |
| Did the statistical methods examine changes in outcome measures from before to after the intervention? Were statistical tests done that provided <i>p</i> values for the pre-to-post changes? | UC       | UC        | Yes       |
| Were outcome measures of interest taken multiple times before the intervention and multiple times after the intervention (i.e., did they use an interrupted time-series design)?              | No       | No        | No        | No        | No        | No        | No        | No        | No        | No        |
| <b>Total Checklist Score (Yes=2, Unclear=1, No=0) Max=22</b>                                                                                                                                  | <b>9</b> | <b>11</b> | <b>12</b> | <b>10</b> | <b>14</b> | <b>12</b> | <b>13</b> | <b>10</b> | <b>11</b> | <b>14</b> |

\*N/A = not applicable. Due to only one intervention arm and no comparison group

| NHLBI NHLBI Quality Assessment Tool for Before-After (Pre-Post) Studies ...continued                                                                                  |                          |                          |                            |                               |                        |
|-----------------------------------------------------------------------------------------------------------------------------------------------------------------------|--------------------------|--------------------------|----------------------------|-------------------------------|------------------------|
| Intervention Name                                                                                                                                                     | Museums on Prescriptions | Social Cure and SP       |                            | Southwest Wellbeing Programme | Wetlands for Wellbeing |
| Author(s) of Corresponding Article(s)                                                                                                                                 | Thomson, et al. 2018(37) | Kellezi, et al. 2019(38) | Wakefield, et al. 2022(39) | Jones, et al. 2013(40)        | Maund, et al. 2019(42) |
| Was the study question or objective clearly stated?                                                                                                                   | Yes                      | Yes                      | Yes                        | Yes                           | Yes                    |
| Were eligibility/ selection criteria for the study population prespecified and clearly described?                                                                     | Yes                      | No                       | No                         | Yes                           | Yes                    |
| Were the participants in the study representative of those who would be eligible for the test/service/intervention in the general or clinical population of interest? | Yes                      | UC                       | UC                         | Yes                           | Yes                    |
| Were all eligible participants that met the prespecified entry criteria enrolled?                                                                                     | UC                       | UC                       | UC                         | No                            | No                     |
| Was the sample size sufficiently large to provide confidence in the findings?                                                                                         | UC                       | Yes                      | UC                         | UC                            | UC                     |
| Was the test/ service/ intervention clearly described and delivered consistently across the study population?                                                         | UC                       | Yes                      | No                         | Yes                           | Yes                    |
| Were the outcome measures prespecified, clearly defined, valid, reliable, and assessed                                                                                | Yes                      | No                       | Yes                        | Yes                           | Yes                    |

1  
2  
3  
4  
5  
6  
7  
8  
9  
10  
11  
12  
13  
14  
15  
16  
17  
18  
19  
20  
21  
22  
23  
24  
25  
26  
27  
28  
29  
30  
31  
32  
33  
34  
35  
36  
37  
38  
39  
40  
41  
42  
43  
44  
45  
46

|                                                                                                                                                                                               |             |             |             |             |             |
|-----------------------------------------------------------------------------------------------------------------------------------------------------------------------------------------------|-------------|-------------|-------------|-------------|-------------|
| consistently across all study participants?                                                                                                                                                   |             |             |             |             |             |
| Were the people assessing the outcomes blinded to the participants' exposures/interventions?                                                                                                  | <b>N/A*</b> | <b>N/A*</b> | <b>N/A*</b> | <b>N/A*</b> | <b>N/A*</b> |
| Was the loss to follow-up after baseline 20% or less? Were those lost to follow-up accounted for in the analysis?                                                                             | <b>UC</b>   | <b>No</b>   | <b>No</b>   | <b>No</b>   | <b>UC</b>   |
| Did the statistical methods examine changes in outcome measures from before to after the intervention? Were statistical tests done that provided <i>p</i> values for the pre-to-post changes? | <b>Yes</b>  | <b>Yes</b>  | <b>Yes</b>  | <b>Yes</b>  | <b>Yes</b>  |
| Were outcome measures of interest taken multiple times before the intervention and multiple times after the intervention (i.e., did they use an interrupted time-series design)?              | <b>No</b>   | <b>No</b>   | <b>No</b>   | <b>No</b>   | <b>No</b>   |
| <b>Total Checklist Score (Yes=2, Unclear=1, No=0) Max=22</b>                                                                                                                                  | <b>14</b>   | <b>10</b>   | <b>9</b>    | <b>13</b>   | <b>14</b>   |

\*N/A = not applicable. Due to only one intervention arm and no comparison group



| Intervention/Programme Name                                                                | Art Lift (26-29,43-45) | Art Shine (30,46) | BRC Connecting Communities (31,48-50) | Cadwyn Mon (32) | Cares of Life Project (33) | Fife Social Prescribing: Mood Café (34,51) | GROW: Art, Park and Wellbeing (35,52) | Luton Social Prescribing Programme (36,53-55) | Museums on Prescription (37) | Social Cure and Social prescribing (38,39,56) | Southwest Wellbeing Programme (40,57) | No Specific Programme Name (41) | Wetlands for Wellbeing (42) |
|--------------------------------------------------------------------------------------------|------------------------|-------------------|---------------------------------------|-----------------|----------------------------|--------------------------------------------|---------------------------------------|-----------------------------------------------|------------------------------|-----------------------------------------------|---------------------------------------|---------------------------------|-----------------------------|
| <b>1) Treatment fidelity strategies for design of study</b>                                |                        |                   |                                       |                 |                            |                                            |                                       |                                               |                              |                                               |                                       |                                 |                             |
| The same treatment dose within conditions                                                  | Yes                    | Yes               | Yes                                   | Yes             | Yes                        | Yes                                        | Yes                                   | Yes                                           | Yes                          | Yes                                           | Yes                                   | Yes                             | Yes                         |
| The same/ equivalent dose across conditions                                                | N/A                    | N/A               | N/A                                   | N/A             | N/A                        | N/A                                        | N/A                                   | N/A                                           | N/A                          | N/A                                           | N/A                                   | N/A                             | N/A                         |
| Planning for implementation setbacks                                                       | No                     | Yes               | No                                    | No              | No                         | No                                         | No                                    | No                                            | No                           | No                                            | No                                    | No                              | No                          |
| <b>2) Treatment fidelity strategies for monitoring and improving provider training</b>     |                        |                   |                                       |                 |                            |                                            |                                       |                                               |                              |                                               |                                       |                                 |                             |
| Standardize training for those involved                                                    | No                     | Yes               | Yes                                   | No              | Yes                        | Yes                                        | No                                    | No                                            | No                           | No                                            | Yes                                   | Yes                             | Yes                         |
| Ensuring provider skill acquisition of the intervention                                    | No                     | Yes               | No                                    | No              | No                         | No                                         | No                                    | No                                            | No                           | No                                            | Yes                                   | No                              | No                          |
| Minimize "drift" in provider skills over time                                              | No                     | Yes               | No                                    | No              | No                         | No                                         | No                                    | No                                            | No                           | No                                            | No                                    | No                              | No                          |
| Accommodate provider differences in delivery                                               | No                     | Yes               | No                                    | No              | No                         | No                                         | No                                    | No                                            | No                           | No                                            | Yes                                   | No                              | No                          |
| <b>3) Treatment fidelity strategies for monitoring and improving delivery of treatment</b> |                        |                   |                                       |                 |                            |                                            |                                       |                                               |                              |                                               |                                       |                                 |                             |
| Control for provider differences                                                           | Yes                    | Yes               | No                                    | Yes             | No                         | No                                         | Yes                                   | No                                            | No                           | No                                            | No                                    | No                              | No                          |
| Measures to reduce differences within treatment                                            | No                     | Yes               | No                                    | No              | No                         | No                                         | No                                    | No                                            | No                           | No                                            | Yes                                   | No                              | No                          |
| Adherence to the treatment protocol                                                        | No                     | No                | No                                    | No              | No                         | No                                         | Yes                                   | No                                            | No                           | No                                            | No                                    | No                              | No                          |
| Measures taken to minimize contamination between conditions                                | N/A                    | N/A               | N/A                                   | N/A             | No                         | N/A                                        | N/A                                   | N/A                                           | N/A                          | N/A                                           | N/A                                   | N/A                             | N/A                         |

| <b>4) Treatment fidelity strategies for monitoring and improving receipt of treatment</b>          |     |     |     |     |     |     |     |     |     |     |     |     |     |
|----------------------------------------------------------------------------------------------------|-----|-----|-----|-----|-----|-----|-----|-----|-----|-----|-----|-----|-----|
| Ensure participant comprehension of the intervention*                                              | Yes |
| Ensure participant ability to use cognitive skills required**                                      | N/A |
| Ensure participant ability to perform behavioral skills required**                                 | N/A |
| <b>5) Treatment fidelity strategies for monitoring and improving enactment of treatment skills</b> |     |     |     |     |     |     |     |     |     |     |     |     |     |
| Ensure participant use of cognitive skills***                                                      | No  |
| Ensure participant use of behavioral skills***                                                     | No  |

No = no explicit evidence was reported in the paper(s)

N/A= not applicable

\*=Comprehension was assumed if social activities and support was facilitated by group lead/ volunteer/ peers and course was completed by participants

\*\*= Not applicable as it is not clear with social prescribing interventions what skills are being targeted due to variation between interventions and within service users

\*\*\*= Unclear what skills are targeted by the interventions and therefore unable to ensure participant use after the intervention or how skill use would be measured

## Supplementary Materials 5: Person Centredness

| Intervention/<br>Programme<br>Name                     | Evidence of a<br>personal needs<br>assessment<br>conducted? (Social,<br>emotional or<br>practical needs) | Evidence of personal<br>choice of Social<br>Prescribing activity<br>offered? | Evidence of the person actively being<br>involved in discussions to establish their<br>preferences/ values on the available SP<br>options to improve their health and/ or<br>wellbeing | Evidence of a person receiving a<br>Social Prescription consistent<br>with their choices? |
|--------------------------------------------------------|----------------------------------------------------------------------------------------------------------|------------------------------------------------------------------------------|----------------------------------------------------------------------------------------------------------------------------------------------------------------------------------------|-------------------------------------------------------------------------------------------|
| Art Lift (26-<br>29,43-45)                             | No                                                                                                       | Yes                                                                          | No                                                                                                                                                                                     | No                                                                                        |
| Art Shine (30,46)                                      | No                                                                                                       | No                                                                           | No                                                                                                                                                                                     | No                                                                                        |
| BRC Connecting<br>Communities<br>(31,48-50)            | Yes                                                                                                      | No                                                                           | No                                                                                                                                                                                     | No                                                                                        |
| Cadwyn Mon (32)                                        | Yes                                                                                                      | Yes                                                                          | No                                                                                                                                                                                     | No                                                                                        |
| Cares of Life<br>Project (33)                          | Yes                                                                                                      | No                                                                           | No                                                                                                                                                                                     | No                                                                                        |
| Fife Social<br>Prescribing:<br>Mood Café<br>(34,51)    | No                                                                                                       | Yes                                                                          | No                                                                                                                                                                                     | No                                                                                        |
| GROW: Art, Park<br>and Wellbeing<br>(35-52)            | Yes                                                                                                      | Yes                                                                          | No                                                                                                                                                                                     | No                                                                                        |
| Luton Social<br>Prescribing<br>Programme<br>(36,53-55) | Yes                                                                                                      | Yes                                                                          | Yes                                                                                                                                                                                    | No                                                                                        |
| Museums on<br>Prescription (37)                        | No                                                                                                       | No                                                                           | No                                                                                                                                                                                     | No                                                                                        |
| Social Cure and<br>Social prescribing<br>(38,39,56)    | Yes                                                                                                      | No                                                                           | No                                                                                                                                                                                     | No                                                                                        |

|                                       |     |     |     |    |
|---------------------------------------|-----|-----|-----|----|
| Southwest Wellbeing Programme (40,57) | Yes | Yes | Yes | No |
| No Specific Programme Name (41)       | Yes | No  | Yes | No |
| Wetlands for Wellbeing (42)           | No  | No  | No  | No |

For peer review only

1  
2  
3  
4  
5  
6  
7  
8  
9  
10  
11  
12  
13  
14  
15  
16  
17  
18  
19  
20  
21  
22  
23  
24  
25  
26  
27  
28  
29  
30  
31  
32  
33  
34  
35  
36  
37  
38  
39  
40  
41  
42  
43  
44  
45  
46

## Supplementary Materials 6 Intervention Development

|                                               | Is there evidence of... |                 |                          |                              |                                          |                                                 |                                |                                        |
|-----------------------------------------------|-------------------------|-----------------|--------------------------|------------------------------|------------------------------------------|-------------------------------------------------|--------------------------------|----------------------------------------|
| Intervention/Programme Name                   |                         | Framework Used? | Best Available Evidence? | Population Needs Assessment? | Evidence of Usability Testing/ Piloting? | Use of Theory or model To Underpin Development? | Co-Design/ Production Process? | If Yes, At What Stage?                 |
| Art Lift (26-29,43-45)                        |                         | No              | Yes                      | Yes                          | Yes                                      | No                                              | No                             | N/A                                    |
| Art Shine (30,46)                             |                         | No              | No                       | No                           | Yes                                      | No                                              | No                             | N/A                                    |
| BRC Connecting Communities (31,48-50)         |                         | No              | Yes                      | Yes                          | No                                       | No                                              | No                             | N/A                                    |
| Cadwyn Mon (32)                               |                         | No              | Yes                      | Yes                          | No                                       | No                                              | No                             | N/A                                    |
| Cares of Life Project (33)                    |                         | Yes             | Yes                      | Yes                          | No                                       | No                                              | No                             | N/A                                    |
| Fife Social Prescribing: Mood Café (34,51)    |                         | No              | Yes                      | Yes                          | Yes                                      | No                                              | Yes                            | Service users in the design of service |
| GROW: Art, Park and Wellbeing (35-52)         |                         | No              | Yes                      | No                           | No                                       | No                                              | No                             | N/A                                    |
| Luton Social Prescribing Programme (36,53-55) |                         | No              | No                       | Yes                          | Yes                                      | No                                              | No                             | N/A                                    |
| Museums on Prescription (37)                  |                         | No              | Yes                      | No                           | No                                       | No                                              | No                             | N/A                                    |
| Social Cure and Social prescribing (38,39,56) |                         | Yes             | No                       | No                           | No                                       | No                                              | No                             | N/A                                    |
| Southwest Wellbeing Programme (40,57)         |                         | No              | Yes                      | Yes                          | No                                       | No                                              | Yes                            | Service users in the design of service |
| No Specific Programme Name (41)               |                         | No              | No                       | Yes                          | No (study was a Pilot)                   | No                                              | No                             | N/A                                    |
| Wetlands for Wellbeing (42)                   |                         | No              | No                       | No                           | No                                       | No                                              | No                             | N/A                                    |

## Synthesis Without Meta-analysis (SWiM) reporting items

The citation for the Synthesis Without Meta-analysis explanation and elaboration article is: Campbell M, McKenzie JE, Sowden A, Katikireddi SV, Brennan SE, Ellis S, Hartmann-Boyce J, Ryan R, Shepperd S, Thomas J, Welch V, Thomson H. Synthesis without meta-analysis (SWiM) in systematic reviews: reporting guideline BMJ 2020;368:l6890 <http://dx.doi.org/10.1136/bmj.l6890>

| <b>SWiM is intended to complement and be used as an extension to PRISMA</b> |                                                                                                                                                                                                                                                                                                              |                                                          |               |
|-----------------------------------------------------------------------------|--------------------------------------------------------------------------------------------------------------------------------------------------------------------------------------------------------------------------------------------------------------------------------------------------------------|----------------------------------------------------------|---------------|
| <b>SWiM reporting item</b>                                                  | <b>Item description</b>                                                                                                                                                                                                                                                                                      | <b>Page in manuscript where item is reported</b>         | <b>Other*</b> |
| <i>Methods</i>                                                              |                                                                                                                                                                                                                                                                                                              |                                                          |               |
| <b>1</b> Grouping studies for synthesis                                     | 1a) Provide a description of, and rationale for, the groups used in the synthesis (e.g., groupings of populations, interventions, outcomes, study design)                                                                                                                                                    | P8-10                                                    | N/A           |
|                                                                             | 1b) Detail and provide rationale for any changes made subsequent to the protocol in the groups used in the synthesis                                                                                                                                                                                         | Protocol ID: P7                                          | N/A           |
| <b>2</b> Describe the standardised metric and transformation methods used   | Describe the standardised metric for each outcome. Explain why the metric(s) was chosen, and describe any methods used to transform the intervention effects, as reported in the study, to the standardised metric, citing any methodological guidance consulted                                             | Table 2 for full list of measures used by studies P19-20 | N/A           |
| <b>3</b> Describe the synthesis methods                                     | Describe and justify the methods used to synthesise the effects for each outcome when it was not possible to undertake a meta-analysis of effect estimates                                                                                                                                                   | P10                                                      | N/A           |
| <b>4</b> Criteria used to prioritise results for summary and synthesis      | Where applicable, provide the criteria used, with supporting justification, to select the particular studies, or a particular study, for the main synthesis or to draw conclusions from the synthesis (e.g., based on study design, risk of bias assessments, directness in relation to the review question) | P8-10                                                    | N/A           |

Synthesis Without Meta-analysis (SWiM) reporting items

| SWiM reporting item                                  | Item description                                                                                                                                                                                                                                                                                          | Page in manuscript where item is reported                                                                                                    | Other* |
|------------------------------------------------------|-----------------------------------------------------------------------------------------------------------------------------------------------------------------------------------------------------------------------------------------------------------------------------------------------------------|----------------------------------------------------------------------------------------------------------------------------------------------|--------|
| 5 Investigation of heterogeneity in reported effects | State the method(s) used to examine heterogeneity in reported effects when it was not possible to undertake a meta-analysis of effect estimates and its extensions to investigate heterogeneity                                                                                                           | P27                                                                                                                                          | N/A    |
| 6 Certainty of evidence                              | Describe the methods used to assess certainty of the synthesis findings                                                                                                                                                                                                                                   | P9                                                                                                                                           | N/A    |
| 7 Data presentation methods                          | Describe the graphical and tabular methods used to present the effects (e.g., tables, forest plots, harvest plots).<br><br>Specify key study characteristics (e.g., study design, risk of bias) used to order the studies, in the text and any tables or graphs, clearly referencing the studies included | Summary of study characteristics P11-17<br><br>Methodological Quality Assessment and Fidelity P20-23, tables supplementary materials 3 and 4 | N/A    |
| <i>Results</i>                                       |                                                                                                                                                                                                                                                                                                           |                                                                                                                                              |        |
| 8 Reporting results                                  | For each comparison and outcome, provide a description of the synthesised findings, and the certainty of the findings. Describe the result in language that is consistent with the question the synthesis addresses, and indicate which studies contribute to the synthesis                               | P11-25                                                                                                                                       | N/A    |
| <i>Discussion</i>                                    |                                                                                                                                                                                                                                                                                                           |                                                                                                                                              |        |
| 9 Limitations of the synthesis                       | Report the limitations of the synthesis methods used and/or the groupings used in the synthesis, and how these affect the conclusions that can be drawn in relation to the original review question                                                                                                       | P28                                                                                                                                          | N/A    |

PRISMA=Preferred Reporting Items for Systematic Reviews and Meta-Analyses.

## Synthesis Without Meta-analysis (SWiM) reporting items

\*If the information is not provided in the systematic review, give details of where this information is available (e.g., protocol, other published papers (provide citation details), or website (provide the URL)).

For peer review only
