# Supplementary material for: Effectiveness and active ingredients of social prescribing interventions targeting mental health: a systematic review
Source: PubMed Central journal article supplement — BMJ Open. 2022 Jul 25;12(7):e060214. doi: 10.1136/bmjopen-2021-060214 (PMC9328101; doi:10.1136/bmjopen-2021-060214), 2022-07-25
Supplement: bmjopen-2021-060214supp002.pdf [file bmjopen-2021-060214supp002.pdf]

## Supplementary Material 2

### Search strategy used

#### Cochrane search:

("mental health" OR "mental disease\*" OR "mental disorder\*" OR anxiety OR bipolar OR "disruptive impulse control" OR "conduct disorder\*" OR "dissociative disorder\*" OR "eating disorder\*" OR "feeding disorder\*" OR "mood disorder\*" OR "personality disorder\*" OR "somatoform disorder\*" OR trauma OR "stress\* related disorder\*" OR depression OR wellbeing OR well-being OR "psychiatric disorder\*" OR "psychiatric problem" OR "non-medical symptom\*" OR "psychosocial problem" OR "psycho-social problem" OR mups OR "medically unexplained physical symptom\*" OR "mental difficult\*" OR recovery OR "social function\*"):ti,ab,kw

AND

(social near/4 (prescri\* OR referral OR intervention)):ti,ab,kw OR (community near/4 (prescri\* OR referral OR intervention)):ti,ab,kw OR ("linking scheme\*" OR u3a OR "university of the third age" OR "buddy scheme\*" OR "men's shed" OR ecotherapy OR "individual placement" OR "supported employment" OR "non-medical referral" OR "non-clinical referral"):ti,ab,kw OR ((wellbeing near/2 referral)):ti,ab,kw OR ((well-being near/2 referral)):ti,ab,kw

#### Scopus Search:

(( (TITLE-ABS-KEY ("mental health" OR "mental disease\*" OR "mental disorder\*" OR anxiety OR bipolar OR "disruptive impulse control" OR "conduct disorder\*" OR "dissociative disorder\*" OR "eating disorder\*" OR "feeding disorder\*" OR "mood disorder\*" OR "personality disorder\*") OR TITLE-ABS-KEY ("somatoform disorder\*" OR trauma OR "stress\* related disorder\*" OR "mental\* ill\*" OR depression OR wellbeing OR well-being OR "psychiatric disorder\*" OR "psychiatric problem" ))) OR (TITLE-ABS-KEY ("non-medical symptoms" OR psychosocial OR psycho-social OR mups OR "medically unexplained physical" OR "mental difficult\*" OR recovery OR "social function\*") ) ) AND ( ( (TITLE-ABS-KEY (social W/4 (prescri\* OR referral OR intervention))) OR (TITLE-ABS-KEY (community W/4 (prescri\* OR referral OR intervention))) OR (TITLE-ABS-KEY ("linking scheme\*" OR u3a OR "university of the third age" OR "buddy scheme\*" OR "men's shed" ))) OR (TITLE-ABS-KEY (ecotherapy OR "individual placement" OR "supported employment" OR "non-medical referral" OR "non-clinical referral" ))) ) )

#### Web of Science Search:

(( TS=(prescri\* near/4 (exercis\* OR education OR learning OR arts))) OR (TS=( "information referral" OR "social referral" OR "green gym" OR "sign-posting intervention" OR "healthy living" OR "time bank" OR "supported referral" OR "non-clinical intervention" OR ecotherapy OR "employment skills" OR "individual placement" ))) OR (TS=( "supported employment" OR "non-medical referral" OR

"non-clinical referral" ) ) OR ( TS=( wellbeing near/2 referral ) ) OR (TS=( well-being near/2 referral ) ) OR ( ( TS=( social near/4 ( prescri\* OR referral OR intervention) ) ) OR ( TS=( community near/4 ( prescri\* OR referral OR intervention) ) ) OR ( TS=( "linking scheme\*" OR u3a OR "university of the third age" OR "buddy scheme\*" OR "men's shed" ) ) ) ) AND ( ( ( TS=( "mental health" OR "mental disease\*" OR "mental disorder\*" OR anxiety OR bipolar OR "disruptive impulse control" OR "conduct disorder\*" OR "dissociative disorder\*" OR "eating disorder\*" OR "feeding disorder\*" OR "mood disorder\*" OR "personality disorder\*" ) OR TS=( "somatoform disorder\*" OR trauma OR "stress\* related disorder\*" OR "mental\* ill\*" OR depression OR wellbeing OR well-being OR "psychiatric disorder\*" OR "psychiatric problem" ) ) ) OR ( TS=( "non-medical symptoms" OR "psychosocial problem" OR "psycho-social problem" OR mups OR "medically unexplained physical" OR "mental difficult\*" OR "ill health" OR recovery OR "social function\*" ) ) )  
 Indexes=SCI-EXPANDED, SSCI, A&HCI, CPCI-S, CPCI-SSH, ESCI Timespan=All years

### Medline/ Embase/ PsychINFO search:

- 1 (Social adj4 (prescri\* or referral or intervention)).mp.
- 2 (community adj4 (prescri\* or referral or intervention)).mp.
- 3 linking scheme\*.mp.
- 4 u3a.mp.
- 5 university of the third age.mp.
- 6 buddy scheme\*.mp.
- 7 men's shed.mp.
- 8 (prescri\* adj4 (exercis\* or education or learning or arts)).mp.
- 9 information referral.mp.
- 10 social referral.mp.
- 11 green gym.mp.
- 12 time bank.mp.
- 13 supported referral.mp.
- 14 (well-being adj2 referral).mp.
- 15 (wellbeing adj2 referral).mp.
- 16 ecotherapy.mp.
- 17 Individual Placement.mp.
- 18 supported employment.mp.
- 19 non-medical referral.mp.
- 20 non-clinical referral.mp.
- 21 or/1-20
- 22 Mental Health/
- 23 mental disorders/ or anxiety disorders/ or "bipolar and related disorders"/ or "disruptive, impulse control, and conduct disorders"/ or dissociative disorders/ or "feeding and eating

disorders"/ or mood disorders/ or personality disorders/ or somatoform disorders/ or "trauma and stressor related disorders"/

- 24 mental\* ill\*.mp.
- 25 Depression/
- 26 exp Anxiety/
- 27 wellbeing.mp.
- 28 well-being.mp.
- 29 psychiatric disorder\*.mp.
- 30 psychiatric problem.mp.
- 31 non-medical symptoms.mp.
- 32 psycho-social problem\*.mp.
- 33 psychosocial problem\*.mp.
- 34 mups.mp.
- 35 medically unexplained physical symptoms.mp.
- 36 non-medical problem.mp.
- 37 mental difficult\*.mp.
- 38 recovery.mp.
- 39 Mental Health Recovery/
- 40 social function\*.mp.
- 41 or/22-40
- 42 21 and 41

\*\*\*\*\*
