# Supplementary material for: Effectiveness and active ingredients of social prescribing interventions targeting mental health: a systematic review
Source: PubMed Central journal article supplement — BMJ Open. 2022 Jul 25;12(7):e060214. doi: 10.1136/bmjopen-2021-060214 (PMC9328101; doi:10.1136/bmjopen-2021-060214), 2022-07-25
Supplement: bmjopen-2021-060214supp003.pdf [file bmjopen-2021-060214supp003.pdf]

### Supplementary Materials 3

#### Methodological Quality Assessments

| <b>CASP Randomised Controlled Trial Checklist</b>                                          | <b>Max Score 22</b>                     |
|--------------------------------------------------------------------------------------------|-----------------------------------------|
| <b>Intervention Name</b>                                                                   | Cares of Life (Afwape, et al. 2010)(33) |
| Did the trial address a clearly focused issue?                                             | Yes                                     |
| Was the assignment of patients who entered the trial properly accounted for at conclusion? | Yes                                     |
| Were patients, health workers and study personnel 'blind' to treatment?                    | Yes                                     |
| Were the groups similar at the start of the trial?                                         | Yes                                     |
| Aside from the experimental intervention, were the groups treated equally?                 | Yes                                     |
| How large was the treatment effect?                                                        | Unclear                                 |
| How precise was the estimate of the treatment?                                             | Unclear                                 |
| Can the results be applied to the local population or in your context?                     | Yes                                     |
| Were all clinically important outcomes considered?                                         | Yes                                     |
| Are the benefits worth the harms and costs?                                                | Yes                                     |
|                                                                                            |                                         |
| <b>Total CASP Checklist Score</b>                                                          | <b>20</b>                               |
| <b>(Yes=2, Unclear=1, No=0)</b>                                                            |                                         |

| <b>The Risk of Bias in Non-Randomised Studies of Interventions ROBINS-I</b>                                                                             |                 |
|---------------------------------------------------------------------------------------------------------------------------------------------------------|-----------------|
| <b>Intervention Name</b> No name provided (Carnes et al 2017)(41)                                                                                       |                 |
| <b>Bias due to confounding</b>                                                                                                                          |                 |
| 1.1 Is there potential for confounding of the effect of intervention in this study?                                                                     | Yes             |
| 1.2. Was the analysis based on splitting participants' follow up time according to intervention received?                                               | No              |
| 1.3. Were intervention discontinuations or switches likely to be related to factors that are prognostic for the outcome?                                | N/A             |
| <b>Questions relating to baseline confounding only</b>                                                                                                  |                 |
| 1.4. Did the authors use an appropriate analysis method that controlled for all the important confounding domains?                                      | <b>Yes</b>      |
| 1.5. Were confounding domains that were controlled for measured validly and reliably by the variables available in this study?                          | Yes             |
| 1.6. Did the authors control for any post-intervention variables that could have been affected by the intervention?                                     | No              |
| <b>Questions relating to baseline and time-varying confounding</b>                                                                                      |                 |
| 1.7. Did the authors use an appropriate analysis method that controlled for all the important confounding domains and for time-varying confounding?     | NA              |
| 1.8. Were confounding domains that were controlled for measured validly and reliably by the variables available in this study?                          | NA              |
| <b>Risk of bias judgement</b>                                                                                                                           | <b>Moderate</b> |
| <b>Bias in selection of participants into the study</b>                                                                                                 |                 |
| 2.1. Was selection of participants into the study (or into the analysis) based on participant characteristics observed after the start of intervention? | No              |
| 2.2. Were the post-intervention variables that influenced selection likely to be associated with intervention?                                          | N/A             |
| 2.3 Were the post-intervention variables that influenced selection likely to be influenced by the outcome or a cause of the outcome?                    | N/A             |
| 2.4. Do start of follow-up and start of intervention coincide for most participants?                                                                    | Yes             |
| 2.5. Were adjustment techniques used that are likely to correct for the presence of selection biases?                                                   | N/A             |
| <b>Risk of bias judgement</b>                                                                                                                           | <b>Low</b>      |

|                                                                                                                                 |                 |
|---------------------------------------------------------------------------------------------------------------------------------|-----------------|
| <b>Bias in classification of interventions</b>                                                                                  |                 |
| 3.1 Were intervention groups clearly defined?                                                                                   | Yes             |
| 3.2 Was the information used to define intervention groups recorded at the start of the intervention?                           | Yes             |
| 3.3 Could classification of intervention status have been affected by knowledge of the outcome or risk of the outcome?          | No              |
| <b>Risk of bias judgement</b>                                                                                                   | Low             |
| <b>Bias due to deviations from intended interventions</b>                                                                       |                 |
| 4.1. Were there deviations from the intended intervention beyond what would be expected in usual practice?                      | No information  |
| 4.2. Were these deviations from intended intervention unbalanced between groups <i>and</i> likely to have affected the outcome? | No information  |
| <b>Risk of bias judgement</b>                                                                                                   | No information  |
| <b>Bias due to missing data</b>                                                                                                 |                 |
| 5.1 Were outcome data available for all, or nearly all, participants?                                                           | Yes             |
| 5.2 Were participants excluded due to missing data on intervention status?                                                      | No              |
| 5.3 Were participants excluded due to missing data on other variables needed for the analysis?                                  | No              |
| 5.4 Are the proportion of participants and reasons for missing data similar across interventions?                               | N/A             |
| 5.5 Is there evidence that results were robust to the presence of missing data?                                                 | Yes             |
| <b>Risk of bias judgement</b>                                                                                                   | Moderate        |
| <b>Bias in measurement of outcomes</b>                                                                                          |                 |
| 6.1 Could the outcome measure have been influenced by knowledge of the intervention received?                                   | No              |
| 6.2 Were outcome assessors aware of the intervention received by study participants?                                            | No information  |
| 6.3 Were the methods of outcome assessment comparable across intervention groups?                                               | Yes             |
| 6.4 Were any systematic errors in measurement of the outcome related to intervention received?                                  | No information  |
| <b>Risk of bias judgement</b>                                                                                                   | Moderate        |
| <b>Bias in selection of the reported result</b>                                                                                 |                 |
| Is the reported effect estimate likely to be selected, on the basis of the results, from...                                     |                 |
| 7.1. ... multiple outcome <i>measurements</i> within the outcome domain?                                                        | No              |
| 7.2 ... multiple <i>analyses</i> of the intervention-outcome relationship?                                                      | No              |
| 7.3 ... different <i>subgroups</i> ?                                                                                            | No              |
| <b>Risk of bias judgement</b>                                                                                                   | Moderate        |
| <b>Overall bias Risk of bias judgement</b>                                                                                      | <b>Moderate</b> |

| <b>NHLBI Quality Assessment Tool for Before-After (Pre-Post) Studies</b>                                                                                              |                                |                               |                                |                                |                                       |                                                  |                                 |                                |                                      |                                  |
|-----------------------------------------------------------------------------------------------------------------------------------------------------------------------|--------------------------------|-------------------------------|--------------------------------|--------------------------------|---------------------------------------|--------------------------------------------------|---------------------------------|--------------------------------|--------------------------------------|----------------------------------|
| <b>Intervention Name</b>                                                                                                                                              | <b>Art Lift</b>                |                               |                                |                                | <b>Art Shine</b>                      | <b>British Red Cross; Connecting Communities</b> | <b>Cadwyn Mon</b>               | <b>Fife SP (Mood Café)</b>     | <b>GROW: Art, Park and Wellbeing</b> | <b>Luton SP Programme</b>        |
| <b>Author(s) of Corresponding Study(s)</b>                                                                                                                            | <b>Crone, et al. 2013 (26)</b> | <b>Crone, et al. 2018(27)</b> | <b>Sumner, et al. 2019(28)</b> | <b>Sumner, et al. 2021(29)</b> | <b>van de Venter, et al. 2014(30)</b> | <b>Foster, et al. 2020(31)</b>                   | <b>Roberts, et al. 2020(32)</b> | <b>Morton, et al. 2015(34)</b> | <b>Thomson, et al. 2020(35)</b>      | <b>Pescheny, et al. 2019(36)</b> |
| Was the study question or objective clearly stated?                                                                                                                   | <b>Yes</b>                     | <b>Yes</b>                    | <b>Yes</b>                     | <b>Yes</b>                     | <b>Yes</b>                            | <b>Yes</b>                                       | <b>Yes</b>                      | <b>Yes</b>                     | <b>Yes</b>                           | <b>Yes</b>                       |
| Were eligibility/ selection criteria for the study population prespecified and clearly described?                                                                     | <b>No</b>                      | <b>No</b>                     | <b>Yes</b>                     | <b>No</b>                      | <b>Yes</b>                            | <b>No</b>                                        | <b>Yes</b>                      | <b>No</b>                      | <b>No</b>                            | <b>Yes</b>                       |
| Were the participants in the study representative of those who would be eligible for the test/service/intervention in the general or clinical population of interest? | <b>Yes</b>                     | <b>Yes</b>                    | <b>Yes</b>                     | <b>Yes</b>                     | <b>Yes</b>                            | <b>Yes</b>                                       | <b>Yes</b>                      | <b>Yes</b>                     | <b>Yes</b>                           | <b>Yes</b>                       |
| Were all eligible participants that met the prespecified entry criteria enrolled?                                                                                     | <b>Yes</b>                     | <b>UC</b>                     | <b>UC</b>                      | <b>UC</b>                      | <b>No</b>                             | <b>UC</b>                                        | <b>No</b>                       | <b>UC</b>                      | <b>UC</b>                            | <b>UC</b>                        |
| Was the sample size sufficiently large to provide confidence in the findings?                                                                                         | <b>UC</b>                      | <b>UC</b>                     | <b>UC</b>                      | <b>UC</b>                      | <b>UC</b>                             | <b>UC</b>                                        | <b>UC</b>                       | <b>UC</b>                      | <b>UC</b>                            | <b>UC</b>                        |
| Was the test/ service/ intervention clearly described and delivered consistently across the - study population?                                                       | <b>UC</b>                      | <b>Yes</b>                    | <b>No</b>                      | <b>No</b>                      | <b>Yes</b>                            | <b>Yes</b>                                       | <b>Yes</b>                      | <b>No</b>                      | <b>No</b>                            | <b>Yes</b>                       |

|                                                                                                                                                                                               |          |           |           |           |           |           |           |           |           |           |
|-----------------------------------------------------------------------------------------------------------------------------------------------------------------------------------------------|----------|-----------|-----------|-----------|-----------|-----------|-----------|-----------|-----------|-----------|
| Were the outcome measures prespecified, clearly defined, valid, reliable, and assessed consistently across all study participants?                                                            | No       | Yes       |
| Were the people assessing the outcomes blinded to the participants' exposures/interventions?                                                                                                  | N/A*     | N/A*      | N/A*      | N/A*      | N/A*      | N/A*      | N/A*      | N/A*      | N/A*      | N/A*      |
| Was the loss to follow-up after baseline 20% or less? Were those lost to follow-up accounted for in the analysis?                                                                             | No       | No        | No        | No        | UC        | No        | No        | No        | UC        | No        |
| Did the statistical methods examine changes in outcome measures from before to after the intervention? Were statistical tests done that provided <i>p</i> values for the pre-to-post changes? | UC       | UC        | Yes       |
| Were outcome measures of interest taken multiple times before the intervention and multiple times after the intervention (i.e., did they use an interrupted time-series design)?              | No       | No        | No        | No        | No        | No        | No        | No        | No        | No        |
| <b>Total Checklist Score (Yes=2, Unclear=1, No=0) Max=22</b>                                                                                                                                  | <b>9</b> | <b>11</b> | <b>12</b> | <b>10</b> | <b>14</b> | <b>12</b> | <b>13</b> | <b>10</b> | <b>11</b> | <b>14</b> |

\*N/A = not applicable. Due to only one intervention arm and no comparison group

| <b>NHLBI NHLBI Quality Assessment Tool for Before-After (Pre-Post) Studies ...continued</b>                                                                           |                                 |                                 |                                   |                                      |                               |
|-----------------------------------------------------------------------------------------------------------------------------------------------------------------------|---------------------------------|---------------------------------|-----------------------------------|--------------------------------------|-------------------------------|
| <b>Intervention Name</b>                                                                                                                                              | <b>Museums on Prescriptions</b> | <b>Social Cure and SP</b>       |                                   | <b>Southwest Wellbeing Programme</b> | <b>Wetlands for Wellbeing</b> |
| <b>Author(s) of Corresponding Article(s)</b>                                                                                                                          | <b>Thomson, et al. 2018(37)</b> | <b>Kellezi, et al. 2019(38)</b> | <b>Wakefield, et al. 2022(39)</b> | <b>Jones, et al. 2013(40)</b>        | <b>Maund, et al. 2019(42)</b> |
| Was the study question or objective clearly stated?                                                                                                                   | <b>Yes</b>                      | <b>Yes</b>                      | <b>Yes</b>                        | <b>Yes</b>                           | <b>Yes</b>                    |
| Were eligibility/ selection criteria for the study population prespecified and clearly described?                                                                     | <b>Yes</b>                      | <b>No</b>                       | <b>No</b>                         | <b>Yes</b>                           | <b>Yes</b>                    |
| Were the participants in the study representative of those who would be eligible for the test/service/intervention in the general or clinical population of interest? | <b>Yes</b>                      | <b>UC</b>                       | <b>UC</b>                         | <b>Yes</b>                           | <b>Yes</b>                    |
| Were all eligible participants that met the prespecified entry criteria enrolled?                                                                                     | <b>UC</b>                       | <b>UC</b>                       | <b>UC</b>                         | <b>No</b>                            | <b>No</b>                     |
| Was the sample size sufficiently large to provide confidence in the findings?                                                                                         | <b>UC</b>                       | <b>Yes</b>                      | <b>UC</b>                         | <b>UC</b>                            | <b>UC</b>                     |
| Was the test/ service/ intervention clearly described and delivered consistently across the study population?                                                         | <b>UC</b>                       | <b>Yes</b>                      | <b>No</b>                         | <b>Yes</b>                           | <b>Yes</b>                    |
| Were the outcome measures prespecified, clearly defined, valid, reliable, and assessed                                                                                | <b>Yes</b>                      | <b>No</b>                       | <b>Yes</b>                        | <b>Yes</b>                           | <b>Yes</b>                    |

|                                                                                                                                                                                               |             |             |             |             |             |
|-----------------------------------------------------------------------------------------------------------------------------------------------------------------------------------------------|-------------|-------------|-------------|-------------|-------------|
| consistently across all study participants?                                                                                                                                                   |             |             |             |             |             |
| Were the people assessing the outcomes blinded to the participants' exposures/interventions?                                                                                                  | <b>N/A*</b> | <b>N/A*</b> | <b>N/A*</b> | <b>N/A*</b> | <b>N/A*</b> |
| Was the loss to follow-up after baseline 20% or less? Were those lost to follow-up accounted for in the analysis?                                                                             | <b>UC</b>   | <b>No</b>   | <b>No</b>   | <b>No</b>   | <b>UC</b>   |
| Did the statistical methods examine changes in outcome measures from before to after the intervention? Were statistical tests done that provided <i>p</i> values for the pre-to-post changes? | <b>Yes</b>  | <b>Yes</b>  | <b>Yes</b>  | <b>Yes</b>  | <b>Yes</b>  |
| Were outcome measures of interest taken multiple times before the intervention and multiple times after the intervention (i.e., did they use an interrupted time-series design)?              | <b>No</b>   | <b>No</b>   | <b>No</b>   | <b>No</b>   | <b>No</b>   |
| <b>Total Checklist Score (Yes=2, Unclear=1, No=0) Max=22</b>                                                                                                                                  | <b>14</b>   | <b>10</b>   | <b>9</b>    | <b>13</b>   | <b>14</b>   |

\*N/A = not applicable. Due to only one intervention arm and no comparison group
