# Supplementary material for: Effectiveness and active ingredients of social prescribing interventions targeting mental health: a systematic review
Source: PubMed Central journal article supplement — BMJ Open. 2022 Jul 25;12(7):e060214. doi: 10.1136/bmjopen-2021-060214 (PMC9328101; doi:10.1136/bmjopen-2021-060214), 2022-07-25
Supplement: bmjopen-2021-060214supp004.pdf [file bmjopen-2021-060214supp004.pdf]

| Intervention/Programme Name                                                                | Art Lift (26-29,43-45) | Art Shine (30,46) | BRC Connecting Communities (31,48-50) | Cadwyn Mon (32) | Cares of Life Project (33) | Fife Social Prescribing: Mood Café (34,51) | GROW: Art, Park and Wellbeing (35,52) | Luton Social Prescribing Programme (36,53-55) | Museums on Prescription (37) | Social Cure and Social prescribing (38,39,56) | Southwest Wellbeing Programme (40,57) | No Specific Programme Name (41) | Wetlands for Wellbeing (42) |
|--------------------------------------------------------------------------------------------|------------------------|-------------------|---------------------------------------|-----------------|----------------------------|--------------------------------------------|---------------------------------------|-----------------------------------------------|------------------------------|-----------------------------------------------|---------------------------------------|---------------------------------|-----------------------------|
| <b>1) Treatment fidelity strategies for design of study</b>                                |                        |                   |                                       |                 |                            |                                            |                                       |                                               |                              |                                               |                                       |                                 |                             |
| The same treatment dose within conditions                                                  | Yes                    | Yes               | Yes                                   | Yes             | Yes                        | Yes                                        | Yes                                   | Yes                                           | Yes                          | Yes                                           | Yes                                   | Yes                             | Yes                         |
| The same/ equivalent dose across conditions                                                | N/A                    | N/A               | N/A                                   | N/A             | N/A                        | N/A                                        | N/A                                   | N/A                                           | N/A                          | N/A                                           | N/A                                   | N/A                             | N/A                         |
| Planning for implementation setbacks                                                       | No                     | Yes               | No                                    | No              | No                         | No                                         | No                                    | No                                            | No                           | No                                            | No                                    | No                              | No                          |
| <b>2) Treatment fidelity strategies for monitoring and improving provider training</b>     |                        |                   |                                       |                 |                            |                                            |                                       |                                               |                              |                                               |                                       |                                 |                             |
| Standardize training for those involved                                                    | No                     | Yes               | Yes                                   | No              | Yes                        | Yes                                        | No                                    | No                                            | No                           | No                                            | Yes                                   | Yes                             | Yes                         |
| Ensuring provider skill acquisition of the intervention                                    | No                     | Yes               | No                                    | No              | No                         | No                                         | No                                    | No                                            | No                           | No                                            | Yes                                   | No                              | No                          |
| Minimize “drift” in provider skills over time                                              | No                     | Yes               | No                                    | No              | No                         | No                                         | No                                    | No                                            | No                           | No                                            | No                                    | No                              | No                          |
| Accommodate provider differences in delivery                                               | No                     | Yes               | No                                    | No              | No                         | No                                         | No                                    | No                                            | No                           | No                                            | Yes                                   | No                              | No                          |
| <b>3) Treatment fidelity strategies for monitoring and improving delivery of treatment</b> |                        |                   |                                       |                 |                            |                                            |                                       |                                               |                              |                                               |                                       |                                 |                             |
| Control for provider differences                                                           | Yes                    | Yes               | No                                    | Yes             | No                         | No                                         | Yes                                   | No                                            | No                           | No                                            | No                                    | No                              | No                          |
| Measures to reduce differences within treatment                                            | No                     | Yes               | No                                    | No              | No                         | No                                         | No                                    | No                                            | No                           | No                                            | Yes                                   | No                              | No                          |
| Adherence to the treatment protocol                                                        | No                     | No                | No                                    | No              | No                         | No                                         | Yes                                   | No                                            | No                           | No                                            | No                                    | No                              | No                          |
| Measures taken to minimize contamination between conditions                                | N/A                    | N/A               | N/A                                   | N/A             | No                         | N/A                                        | N/A                                   | N/A                                           | N/A                          | N/A                                           | N/A                                   | N/A                             | N/A                         |

| 4) Treatment fidelity strategies for monitoring and improving receipt of treatment          |     |     |     |     |     |     |     |     |     |     |     |     |     |
|---------------------------------------------------------------------------------------------|-----|-----|-----|-----|-----|-----|-----|-----|-----|-----|-----|-----|-----|
| Ensure participant comprehension of the intervention*                                       | Yes |
| Ensure participant ability to use cognitive skills required**                               | N/A |
| Ensure participant ability to perform behavioral skills required**                          | N/A |
| 5) Treatment fidelity strategies for monitoring and improving enactment of treatment skills |     |     |     |     |     |     |     |     |     |     |     |     |     |
| Ensure participant use of cognitive skills***                                               | No  |
| Ensure participant use of behavioral skills***                                              | No  |

No = no explicit evidence was reported in the paper(s)

N/A= not applicable

\*=Comprehension was assumed if social activities and support was facilitated by group lead/ volunteer/ peers and course was completed by participants

\*\*= Not applicable as it is not clear with social prescribing interventions what skills are being targeted due to variation between interventions and within service users

\*\*\*= Unclear what skills are targeted by the interventions and therefore unable to ensure participant use after the intervention or how skill use would be measured
